# Supplementary material for: Genome-Wide Identification and Expression Analysis of the Plant U-Box Protein Gene Family in Phyllostachys edulis
Source: Front Genet. 2021 Nov 30;12:710113. doi: 10.3389/fgene.2021.710113 (PMC8669748; doi:10.3389/fgene.2021.710113)
Supplement: Supplementary file 1 [file DataSheet1.xlsx]

## Sheet: Table S1
Table S1 The details of PUB genes in the Phyllostachys edulis V2 genome
Number	Sub-Class	Gene ID	Protein Sequence	scafflod	Start	End	ORF_Length(bp)	Protein_Length(aa)	Theoretical pI	Molecular weight	strand	Predicted location(s)	Location of U-box domain
PePUB01	ClassⅠ	PH02Gene37990.t1	MASPPQPATSRPQRTPDEVEDIILRKILLVSLTPPSSPNPAVAYLELTAAELLSESRPLLALRDTAERLLIDRLSLPDPPAASPSPLAFLAAAFRRAADEARKISTIRDAALRARLAASIAHLRGLILSYARIVASNPDTFPSPPNAPHPAAELLVFLLAEASDPLDPTPAPSARPPPGFLEEFFGNADYETVETVMGELYERLRQSVEKVSALGDFQRPLRVLRRLVGIPDCAKALVNHPKWIPKNQIMLIGEGRVMEISSVLGAFFHVSAIPDREFASKPDVGQQCFSEASSRRPADLLSSFTTIKSVMNGLYDGLKDVLLILLKNSDTREKVLEYLAEVINKNAGRSRMQVDPLKCASSGMFVNLSAVLLQLCEPFLDRMESKKDKIDVKYLFCND…	15	29059874	29068280	3060	1020	5.46	114661	-	Nucleus	938-1001
PePUB02	ClassⅠ	PH02Gene47888.t1	MASPLQPVLSRPQRTPDEVEDIILRKILLVSLTPPSSPSPAVAYLELTAAELLSESRPLLALRDTSERLLIDRLSLPDPPAASLSPFAFLVAAFRRAADEARKISTIRDAALRARLAASIAHLRGLILSYARIVAGNPDTFPSPPNASHPAAELLVFLLSEASDPLDPTPAPGAPPPPGFLEEFFGNADYEIVEPAMGELYERLRQSVEKVSALGDFQRPLRVLRRLVGIPNCAKALVNHPKWIPKNQIMLIGEGRVMEISSLLGAFFHVSAIPDREFASKPDVGQQCFSEASSRRPADLLSSFTTIKSVMNGLYDGLKDVLLILLKNSDTREKVLEYLAEVINKNAGRSRIQVDPLKCASSGMFVNLSAVMLRLCEPFLDSMESKDRIDVKYLFCNDR…	21	53492747	53501317	3096	1032	5.34	116137	-	Nucleus	942-1005
PePUB03	ClassⅡ	PH02Gene33756.t1	MEGAGELRVATGGGAAQLRTSQMALAGSKRRPGLRYDRLPLPSSLSLYPPTRPDPARPNHRASHTERGRGGESSIGVASQGDPPPRSRSPPSPPPRPPPPPHRGLMENFSPRNLLNSISRLRVLTSDGSTTRPKPIQKYCQNVCDISSIVNPLIEDLCKSPEEQLNEVLRELDTAINKASGLIGNWHQTTSKIYFVSQIESVISDIQGCSLQLCQLVNSLLPSLTGRACTCIEKLQDINYEHMFDLVKDVAMELTEMDAASSENLLKVSSSLSLSTNLELYMEAVSLENLRARAIRGENREELDLVEQMIPLVSYMHERLLRETQLLSINGVPIPADFCCPLSLELMSDPVIVASGQTYERVYIKLWLDEGFTICPKTRQRLGHSNLIPNYTVKALIAN…	3	54740207	54745998	2805	935	6.15	101010	+	Nucleus	337-400
PePUB04	ClassⅡ	PH02Gene23986.t1	MNASPVRKRQTMVARYDLVHACYNHTIVVDASTKAATFSSTEAAARTTTATKVTSCSTTRASAKAAALASSETTPAGSPPMSLPPNQPKRRRLLSLPAVCPCEGIAPAPLLASLLSLAADVASLRAGDASAFPLLRSGVHQAVRIAGILLAFLEEVQDATTAAAAPSSAVLGLTELHVAMQKMRFLLTDCARRGARLWVLVNAGLVASELRVVLGSVAAAMDVLPRSVVDASVEAGQLARLMSDQAWRAGVRPDALDELAARSVRSILEKFKNGVAPDAEDVMRVLDRVGVRCWSECSEEIAFLESELSAWSDAGDENSNDAVLINSLMAFLVYCRVVLFDHIDAKRADAAAPARPARCPEWIKPEELQCPISLDLMTDPVTVSTGQTYDRASISRWIK…	3	29557815	29563499	2319	773	8.73	81317	-	Nucleus	367-430
PePUB05	ClassⅡ	PH02Gene16452.t1	MLSVSTVDVSQENSMESDRAVLERQTACRAPTNVTQMPQSLFASVNLAKDLAARCRGRALQLMDDEIQSITQDLESVIRNICDYLGRIPGTAFGSNAYKDVAIKSLSMRGYSEADMSMNVVSNRPNRRSLHESDTPRLVDFLRGMYHESHEVGGQTFNSLPEVAEYVEPLYDAFFCPLTNEVMTDPVTAESGVTCDRRAVEEHFARFEDSSEPVSCPVTKMPMQSKAVMSNSSLKSVIAEWTMRNEAMRIRIARTALSLSITEAMVLEAIHELKSLAKLRGKNREQMHKIGVTKFLARLLDNHNAQIRCDALELLCLLVEDEEGKDIIGKTKAIARTIKLLSSNATDERHAAISFLLELSKSQLLLENIGSTAGSILILTTMKINDSDDPIAADKAGTV…	3	90029860	90033248	2940	980	6.51	105760	+	Nucleus	173-241
PePUB06	ClassⅡ	PH02Gene27908.t1	MAAHNLDGDSEFEDQSNDGYQEPAFEAFMCPLTKQVMQDPVTIETGQTFEREAILKWFKECRDNGRKATCPLTQRELRSTEISPSIALRNVIEEWRARNEEKELEKACNSLNLHSEDDTLHALVYISQLCQRSSPKKSLVRNEGIIPTIAEMLKSSSRGVRLKSLEVLRVVVEGNDENKEELGKGDTIRTIIKFLSNEHFQERELAVSLLYELSKYEPICERIGAVYGAILLLVGMGSSKSENMVAVEKAENTLRNLEKYETNIKQMAENGRLQPLLTKLFEGTPEVQVAMAEYLGELALANDVKAVVAEQVGALLVSIMKTTGSLPAREATLKALREISSNESSAKVLLQAGILPPLVKHLFSVGVGSLHFPMRLKEVSATILANLVASGAGFRSIPL…	3	103495752	103498704	2502	834	5.37	89603.8	-	Nucleus	27-95
PePUB07	ClassⅡ	PH02Gene27413.t1	MGAGRPRRWKLPFQRTAPSSPSKSPLPYSPARSAAAAEAGGKEEEPVPPEFVCPILGALMADPVILASGQTYERACLQACAELAFLPSGVGSGSVSMIPNSALKAAIGTWCARSGRTVPAPPSTEAAREAVLRAMPPAAAAAAAAKSVRTRRAALASSSNSSYSSPASAASTSSYTSSSEITAAEEDVGVKPVKEAAKEVVLVEMAVDPLEDEVVAKVMDSDEEGEVAAAVTALREATRESAERRRALCTPRLLAALRRVLLLPRHAPARADATAALVNLSLEPANKVCIVRAGAVPALVEVLRSGTSAPEAREHAAGALFGLSLNEDNCAAIGVLGAVPPLLDLLTSPTQPARARRDAGMALYHLSLVAVNQSKVARFPGALKALLTVASSATEPTPT…	3	28937262	28938914	1650	550	7.87	57057.2	+	Nucleus	50-110
PePUB08	ClassⅡ	PH02Gene41954.t1	MMAMMASSSLCPANSRSLPMSMYQEPPACGAQVLDIDAAIKDGILGDPTVSFAAAAAKHHYPADLRRIIDELGAASVADDEEAVPAVFICPISLEPMLDPVTLCTGQTYDRANISRWLALGRRTCPTTMQELWDDALTPNATLKHLIAAWFSRRYAGFKKRSADFDGHAADLVHALRGTKVRSPLKGQARVAALRELRAVAAAHPSAAKAIGEVGGVALLTSLLGPFTSHAVGSEAVAVLVSGVALDADAKAALMQPARVSLVVDMLHEGAVDTKINCICLIRVLMDERGFRPEMVASLSLLVGVMRLVRDKRHPDGVAAGLELLNSICTVHPPARGMVVSIGAVPQLVELLPELGTECVEPALSILDVLAIVPEGRAALKDCPRMIPNAVRLLMRVSE…	5	16446125	16447667	1401	467	6.56	49616.2	-	Nucleus	87-150
PePUB09	ClassⅡ	PH02Gene25846.t1	MARGRRGGGWETSKAAAAVVGRRRGDGREIDYMMRKQARGGFAALRRKLALLAAILESVLDESLAFSDAANLCFRELYVVLFRAELLAAHVASAGRALALIRGPRIAASFRDLDAELAVVLDMLPAASLRLGPDARDHLDLLRSHCLGRRPSQYHDTSEAALRDLLLSVLRRFELSDHPDPSSLQSLLTNIGISDCRAEIEYLEEQIMSQEEDTDLPLIGGVIALLRYCLFLLFDHDHATNPHRWPPAGNRRQSLSWDSADVSTIAVPREFSCPISLELMHDPVVVSTGHTYDRPLIVQWIGEGQSSCPNSRQTVMDNQLVPNRALHSLISQWCLVHNVPYDTLESDVGMAQRVAVAYSGKAAIEANKATARILVGMLAEGSDSTKVVAAREIRLLAKA…	6	50655494	50660520	2061	687	8.84	74607.9	+	Nucleus	270-333
PePUB10	ClassⅡ	PH02Gene34724.t1	MQRSGAQARKASLAESILEAISELTSSVAAADVEQENFMDVGSHLHHVPPATMELQRAQNSPTNVMHVIEYLAANVDLAKDLVARCSAVAQQLMDDDLQSITEDLDNVIKNIGHELSRIPASAFGSNRFADAAVDTQLQVAGNRQHPCDQRSFDGYSEADMSIVVANDRPRRRTLHNSDMPRLVDFLQGMYHEAHEFGGQSFSSLPEVAEYVEPLYDSFFCPLTNKVMFDPVTTESGVTYDRRAIEEYFEKFTDGPEPVICPVTKMAMQSKTLRNNVPLKSTIAEWIMRNEATRVRIARTALSLATTEAMVLEAIHELKLLARLRRRNREQMHKIGITKFLTRLLEHKDALIRCDSLDLLCLLVEDDAGKEIIAKTRAIARTIKLLSSSSPDERHAAIS…	6	22617194	22623135	3060	1020	6	112415	-	Nucleus	218-286
PePUB11	ClassⅡ	PH02Gene49989.t1	MSTGRPRWRPSSTASSPPSSASPSSSFTADPPAEFLCPISGTLMADPVVVPPGQTFERACIQACAALAFSPPAVAADLSALPSSSSPLVLVPNVALRTTILNWCDRLALPHPSPLSPDTARDIVRRLMPPHQEQRSQLQHCPLPSSVRTRNHYGGHDFEQEQPKQTGGSLEEEIMAVLGAADGAGPAEQEAAIASLRQATRENRDMRRQLCTPRLLAALRPMLLSGDAGVQVNAAAAMVNLSLEAENKVRIVRSGAVSPLVDVLRGGHPEARDHAAGAIYSLAVEDENRATIGVLGAIPPLLELFASAGAGHRARREAGMALYHVSLSGMNRSKIARTPGVVRTLLAAADAWDSANETDAAALRRLAVMILANLAGCPEGRVALMDGGAVAAVVRLMRN…	6	19793322	19794863	1539	513	7.15	53846.2	+	Nucleus	35-104
PePUB12	ClassⅡ	PH02Gene36626.t1	MAGAAPPEFICPISGKLMGDPVIVPNGETFERGCVEACFALAFTPATLSPSMDFAASPPPTLIPNANLKKAISSYCDRSGKPRPLPLAPYEAKSIVRRLMSVQQEQPTRTTRINGEQFESPPPSQEFTPLGLTQEEAVLVRLLDGEPSRQEGALEALKQTLRDGKNGQRRALCTPRLLDGLRRLLSLGSAHGGVQLGAAACVVNLSLEPANRVQLVRAELVPVLVELLGAESPELRDHAAGAIYSLSIEEKNRIPIGVLGAVPPLLQLFASTVDGYRARRDAGMALYYLSLAEMNRSRLTRTASTVSILVDAGHAAVEAALRRPALMIMTNLAGCGEGREALIDGGAVAAVTGLMRRAVAPGSTEEEYCLSALHGMSRGNVRFGGLARAAGADTVLRRV…	6	19796417	19797880	1461	487	6.43	51884.4	+	Nucleus	8-75
PePUB13	ClassⅡ	PH02Gene29451.t1	MASARNAAAVASPSSSYSSSAPDGEILRSLHRLAWDLSAAEAPAPFLRAVFASVSRRAKLLVAVFDDIMHCGGLPRSASLCLREVLLVLQRFKAVVADCSARSRMRLLLQSDEVASRVRELQHDLATLLDLLPVSELGLADDVADLLALASRQCRRRSQAAAAEQELKASVLALIQEVEREIVPERERLEGILEEVGINDPASCSDEIEILEREIGDRVAERWTSAMIALVGLLRYAKCVLFSAATPRPLDSKVDLDDDGAEPPALPPDFRCPISLDLMRDPVVVASGQTYDRESITRWFGSGKSTCPKTGQVLPDLELVPNKALKNLISRWCRGNGVAMEGCEPGKPEPAPVVTANKAALEAARMTASFLVKKLSVSFSPDAANRVVHEIRQLSKSGS…	7	35192011	35194029	2016	672	6.75	71773.7	-	Nucleus	269-332
PePUB14	ClassⅡ	PH02Gene07967.t1	MPSRVASEIAALPEPRGPMRRLCADLARRVRLLAPLLDHLRQPPPHDSSSQLPLADALRAALHLLRALQQGSKIYQAMRGDGILDDFATVNKLIQTALDDLAYHTFDMPEEVQEQVALVHSQFERAATRTDSLDTQLSKDLAWALNDKTSDPAVLTRISEKLQLQTMADMKKESVALHEMVISSGGGPDDCVEEMSSLLKKLKDCVIAEAPTDDTLTTRSASIKHRSPIIPDEFRCPISLELMQDPVIVSSGQTYERSCIQKWLDSGHKTCPKTQQPLTHTSLTPNFVLKSLIAQWCEANGIELPKNKANSRDKKAVKSSDYDDASLLSLMNRLRIGNQDEQRAAAGEIRLLAKRNVNNRICIAEAGAIPLLVNLLSSSDPRTQEHAVTALLNLSIHEN…	8	373620	379042	1917	639	7.87	70180	+	Nucleus	233-296
PePUB15	ClassⅡ	PH02Gene50014.t1	MLPTPVVPRPAPEPSEAPSGRHLPDGDLVEELLATVSSARAFQEFRRSQRKECFNLLRWLQLVLPLIQELREAASPLTDDAYRRLALLARAFHAARRLLRCCHDGSKIFLSLESEAVLGRFRGVYEKINLALDGMPYSEMGISDEVKEQVELINAQLKRSKKRTDTQDMELAMDYMVILQNKEDRNADRAILKRLAKKLELQSLADLRAETMAIKKLINERNGQHEESTKHIIELLNKFKEIAGIDEKNILGEVSIPKYLEKCPSLMIPNDFLCPISLEIMTDPVIIASGRTYERRTIQKWLDAGQRTCPKTQQTLAHLSLAPNFALKNLILQWCEKNRVEIQMGEPEPVAEQEERKEDIPSLVKDLSSVHLDVQRKAVKKIRTLSKENPENRVLITDN…	8	78994169	78996480	1911	637	7.56	70857.3	+	Cytoplasm;Nucleus	271-334
PePUB16	ClassⅡ	PH02Gene50299.t1	MGTARPRWRPSSTASSSPPSSASPSSSFTADPPAEFLCPISGTLMADPVVVLPGQTFERTCIQACAALAFSPPAVAADLSALPSSTSPLVLVPNVALRTAILNWCDRLALPHPSPLSPNTARDIVRRLMPPPHREQRSQLQHCAPASSVRTRNQYGDDDFVQEQPKQASGSFEEEIMAVLGAADGAGPAEQEAAMASLRQATRQNREMRRQLCTPRLLAALRPMLLSADAGVQVNAAAAMVNLSLEAENKVRIVRSGAVSPLIDVLRGGHPEARDHAAGAIYSLAVEDENRAAIGVLGAIPPLLELFASAGAGHRARREAGIALYHVSLSGMNRSKIARTPGVVRTLLTAAEARDRAKETDAAALRRLAVMILANLAGCPEGRAALMDVGAVAAVVRLM…	8	22134509	22136056	1545	515	8.85	54153.7	+	Nucleus	34-103
PePUB17	ClassⅡ	PH02Gene21914.t1	MASSVSASPVDFLLLRSPPRRRRAPLLSGALFAPPDLSGAPLLRSLVSLAYELSSASLPPFQRGDFAALRRKLSLLAVILESVLDESPAFSDAASLCFRELYVVLCRAELLVDHVASAGRAWALLRGPRIAASFRDLDAEFAVVLDVLPAASVRLGPDARDHLDLLRAHCRGRRSSQYHDTSDAALRDCLLAVLRRFELSDLPDPSSLQSLLANIGISESDSCRAEIEYLEEQIMSQEGDTDLPLIGGVVALLRYCFFLLFDHDNATNPLRWQSAGNRQQSLSWDSGDDSTIAVPREFSCPISLELMRDPVVVSTGHTYDRPLIVQWIGEGQSCCPNSRQTLMDNQLVPNRALRSLISQWCLVHGVQYDVLDSNVGMAQRVAVAYSGKAAIEVNKATAR…	8	49960085	49961761	1674	558	5.72	60990.1	-	Nucleus	297-360
PePUB18	ClassⅡ	PH02Gene05520.t1	MSPPPNHPKRRRLLTLPAVCPCEGIAPAPLFSSLLSLAADVASRMAADASAFPVLRQGVRQAVRLAGLLLAFLEEVQEATKMMALPSSAVLGLTELHVALQKMRFLLTDCARRGARLWVLVNAGLVASELRLVLGSVAAAMDVLPRSVVDASVEAGELAQLVTDQAWRAGVRPDAGDDLAARSVRSILDQFKSGVAPDAEDVRRVLGRVGVRCWSECSEEIAFLESELSARLEVGDENSSEVVLINILMAFLVYCRVVLFDHIDVNKADSAAPARPARCPEWIRPEALQCPITLDLMTDPVTVSTGQTYDRASISQWIKAGSRKCPVTGERLRTADVVPNAALRGIIELMLLSNGVSLPEPSARLRHGAVGNAGVPFGSAAAGAARLAVAHIVAQLSRG…	8	44358728	44360835	1896	632	7.94	66960.3	+	Nucleus	287-350
PePUB19	ClassⅡ	PH02Gene11795.t1	MQRSGAQARKASLAESILETISELMSSVASADIEQENFMDVGSHLHHASPVTMELQRAHNSPTNVMHVIEYLAANVDLAKDLVARCSAVAQRIMDDDLQSITEDLGNVIKNIGHELSRIPASAFRSNRFADAAVGAHLQVAGNRQHPCDQRSCDGYSEADMSITVANDTPRRRTLHNSDMPRLVDFLQGIYHESHEFGGQSFRSLPEVAEYVEPLYDSFFCPLTNKVMVDPVTTESCVTYDRRAIEEYFEKFTDGSEPVICPVSKMAMQSKTLRSNVPLKSTIAEWIMRNEATRVRIARTALSLATTEAMVLEAIHELKLLARLRTKNREQMHKLGITKFLARLLEHKDALIRCDSLDLLCLLVEDEAGKESIAKTRAIARTIKLLSSSSPDEKHAAIS…	8	28138166	28142638	3054	1018	6.1	111855	-	Nucleus	218-286
PePUB20	ClassⅡ	PH02Gene26319.t1	MASARNAAAAASPSSSYSSSAPDGEILRSLHRLARDLSAAEAPAPFLRAVFASVSRRAKLLVAVFHDLMQCGRLPRSASLCLREVLLVLQRFKAVVAECSARSRMRLLLQSDEVTARVRELQHDLATLLDLLPVPELGLGDDVEDLLALASRQCRRRSTAAAAEQELKASVLALIQEVEREIVPERERLEGILEEVGINDPASCSDEIEILERDIGDRVAERWKSAMIALVGLLRYAKCVLFSAVTPRPLDSKVDLDDDGAEPSAAPPDFRCPISLDLMSDPVVVASGQTYDRESITRWFGSGKSTCPKTGQVLANLELVSNKALKNMISRWCRQNGVAMEGGEPGKPESAPVVTANKAALEAARMTASFLVKKLSVSFSPDAANRVVHEIRQLAKSGS…	9	50151335	50153341	2004	668	8.13	71347.2	+	Nucleus	269-332
PePUB21	ClassⅡ	PH02Gene41007.t1	MAGDREEGEAPAAKRVAAAVEAAAAAGEYRNAFRRQLLALSRRIRLLGPFSEELLERRAPAPEEEERALAPLADALEKALELLRLGREGSRIFLVFERDSVMKKFQEVIGQLEQALCDFPYNKLDISDEVREQVELVHTQLRRAKERVDIPDDELYDDLLSLYNKNYDPSAELAILERLSEKLHLMTITDLTQESLALHEIVASSGGQDPGEHVEKMSMLLKKIKDFVQTQNPEMGPPMASKVIDSNGDARPITVPDEFRCPISLELMKDPVIVATGQTYEREYIEKWLVSRHHTCPITQQRMANTTLTPNYVLRSLIAQWCEANGIEPPKRSSQPNKPAPTCSSSERANIDALLSKLCSPDPEEQRSAAAELRLLAKRNANNRICIAEAGAIPLLLSL…	11	35625282	35633710	2025	675	5.37	74253.1	-	Nucleus	258-321
PePUB22	ClassⅡ	PH02Gene44641.t1	MAEVQDGHYDSSADSLRVEPIYESFLCPLTKQVMRDPVNIESGATFEREAILKWFKECISSGRRLVCPVTKKELSSTELNPSIALRNTIDEWMHRNEAAKLDAARKSLTSESSEIDILQALEYVAEICQRSRSNRHAVRKLGLISLIADLLKNSCTKVRQKALECLRFVAKDDNENKNEIALGDNIRTIVKFLSHGHIQEKEHAVSLLYELSEYKPLSEKIGSVPGAILILVGLSSSKVENLLTIDRAESTLENLESCEKNVRQMAENGRLQPLLRLLLEGSPDTQLSMAAYLGELVLSNDVKVFVAQTAGSALVNIMKSGNREAREAALKALNQISSYDTSAKILIEAGILPPLITDLFTVGSNQLPMRLKEVSATILANVVASGASFESIPLDHNHQ…	11	19694972	19698192	2421	807	5.65	88563.8	-	Nucleus	24-92
PePUB23	ClassⅡ	PH02Gene47621.t1	MAGDREEGEPPLPAEAPASERVAAAVEAVAAAGEYRNAFRRQLLALSRRIRLLGPFAEELRERRAPAPEEEERALAPLADALEKALELLRLGREGSRIFLVFERDSIMKMFQEVIGQLEQALCDFPYNELDISDEVREQVELVHAQLKRAKERVDMPDDEFYNDLLSLYNKNYDPSAELAILESLSEKLHLMTITDLTQESLALHEMVASGGGQDPGEHIEKMSMLLKKIKDFMQTKNPGMGPPMASKVMDSNGDARPITVPDEFRCPISLELMNDPVIVATGQTYERACIEKWLASGHHTCPTTQQRMANTTLTPNYVLRSLIAQWCEANGIEPPKRSSQPNKPTLACSSSERANIDALLFKLCSPDPEEQRSAAAELRLLAKRNANNRICIAEAGAI…	12	41084073	41093687	2043	681	5.19	74406.2	-	Cytoplasm;Nucleus	264-327
PePUB24	ClassⅡ	PH02Gene22462.t1	MAEVQDGHYDSSADSLRVEPIYESFLCPLTKQVMRDPVTIESGATFEREAMLKWFKECNSSGRKLVCPVTKKELSSTELNPSIALRNTIDEWMHRNEAAKLDAARKSLTSESSESDILQALEYVAEICQISRSNRHVVRKLGLISLVADLLKNSSTKVRQKALECLCFVAKDDNENKNEIAVGDNIRTIVKFLSHGHIQEKEQAVSLLHELSEYKPLSEKIGSVSGAILILVGLSSSKVENLLTIDRAEKTLENLESCEKNVRQMAENGRLQPLLRLLLEGSPDTQISMAAYLGELVLSNDVKVFVAQTAGSALVNIMKSGNREAREGALKALNQISSYDASAKILIEAGILPPLITDLFTVGSNQLPMRLKEVSATILVNVVASGANFESIPLDHNRQ…	12	21440413	21443657	2421	807	5.54	88244.5	+	Nucleus	24-92
PePUB25	ClassⅡ	PH02Gene20094.t2	MAMDIGGSVSDRRMRAMDQGGEVIGGVVNSMSRLMHLASCHTTTGRNSQALRSTIAILKQLKPVLDEALNLNLANASSRLTVALQDLDAAVNQSREHLEMWHHKMPKIYTVLQSRSMLFNVHRSSMRICEILKEVLLLSSSTLSLANIQCCIQELHCVEVDPCSDIIEKTLQDIKEKCSPRIEDITKIVNSLGLASNLELLAESIALEKERLKLEVKNGDAELINWLIVFIDHVKYCIQELKQYGYINGIPIPSHFRCPLSLQFMQDPVIVASGQTYERSFIQKWLNNGLRICPKTRQNLVNIDLIPNYTVKALIETWCHANNLKIGKSICHERGNKSFPTNCLEVVQPGNVLDYFPQGESTQNLSAEYSNQPKEREHETPVCGEDPYLVSDPHSTSVC…	13	96117199	96126276	2340	780	6.69	85451.2	+	Nucleus	255-318
PePUB26	ClassⅡ	PH02Gene07884.t2	MPPHERRAPHRRMLALPAVCPCEAISPGTLLASLASLAADVAGRDVATLPALRRGAGEAVRITGVLLAFLEEVREASSAAPLPGAAVLGLSELHVAMQKLRFLLADCARKGARLWVLMKAELVASELRVVLGSVSTAMDVLPGDVVGASAEAEELAGLVSKQAWRAAVRPDADDGRAARSVRSMLAQFKSGVTPDAEDARLVLGRVGITSWWDCAEEVSFFESELLERLEAGGENDNDLVLISGLMAFMVYCRVVLFDRIDSKKADAAVPAPTPASCAAWINKEALQCPITLELMTDPVTVATGQTYDRASIKRWVNNGCRTCPVTGKRLRSAEVVPNIAVRGIIQQLLLSNGASLHESSGKHRCAVDKTAVPFGAAEAGGIRLAVAFLIAMLSRGTPE…	13	68456586	68458652	2064	688	8.41	72789.1	-	Nucleus	285-348
PePUB27	ClassⅡ	PH02Gene03675.t1	MPSRVAAEIAALPEPRGPMRRLCADLARRIRLLAPLLAHLRQPPPDDDSCYSSSSSPLADALRAALHLLRALHHGSKIYQVLQPNPIQSLIWARLGGLQFNFNSIQMFIAPNYSGRCVTFRQAMRGDGILHNFATVNEQIQMALDDLAYHTFDMPEEVQEQVALVHSQFKRAATRTDSPDTQLSKDLAWALSDKTCDPALLTRISEKLQLQTMADMKKESVALHEMVISSGGEPDGCVEEMSSLLKKLKDCVIAEAPTAETLSTRSASIKHRSPIIPDEFRCLISLELMQDPVIVSSGQTYERSCIQKWLDSGHKTCPKTQQPLTHTSLTPNFVLKSLIAQWCEANGIELPKNKSNSRDKKAAKSSDYDHAGLVSLMNRLRSGNQDEQRAAAGEIRLLA…	14	256510	258657	1965	655	7.23	71276.9	+	Nucleus	279-342
PePUB28	ClassⅡ	PH02Gene00170.t1	MEEMQSMSIIDSISNFQVLSSSNASRTELVKRYCRKIDEILDLMKMVLDGAFSHIIPDDKLNKVLEELDATINEASELVGGWNQMMSKIYFVTQVESIITTMQAYVLELCQVVNSLMLPSDTSCVSMYLEKLEHTYCEKISVVIREASRDIAGEVMPKSETLAKIQATLSLSTNQELLMEAVALTKIKMKGNSDDSAELDGINDIVELVNHVLDKHVEEKQIHSINGVPIPADFCCALSLELMSDPVIVASGQTYEQVFIRKWLDMGYNICPKTRQTLGHTKLIPNYTVKQLIENWCEMHGIMLPDPVKLLSLSFPVSLNLTNGTTSDKSHSFDSSPSANKSGSPEHSELSALGPKAQCLSDNSTHDNLIHENSDSDDRVSSFEDTDDSESDSLRLSVA…	14	75700967	75703605	2442	814	5.07	88748.5	+	Nucleus	233-296
PePUB29	ClassⅡ	PH02Gene32622.t1	MANLRAVVASAMSSSGSSSSAFLPPPSPSDGELLRSLHRLACDLSVVETPAPFLRAAFASISRRSKLLAATFDDLLLCAASAGDLPRSALLCLREVLLVLQRFKAVVADCSARSRMRLLLQSDEMNEELRELHHDLATLLDLLPVVELGLAEDVMDLLALASRQCRRCSPAAEAEQALKASVLSLIQEIEREIVPERERLEEILEEVGVNDPASCSGEIESLEREIGDRASERWTPAMIALVGLLRYAKCVLFSATPGPSDSKADIEVQDGEPPAPPPDFRCSISLDLMRDPVLVASGQTYDRESIDRWFGSGKSTCPKTGQVLANLELVPNKALKNLISKWCRENGVSMESCEARKSEPAQAVAANKAALEAARMTASFLVKKLSVSFSPDAANRVVH…	14	67111639	67113687	2046	682	6.35	72735.8	-	Nucleus	279-342
PePUB30	ClassⅡ	PH02Gene09364.t1	MNEEAKPNASEDANTNAAAAAAASATAAEAASPPPPLGSESAEGEAGNLVEQLAELVDEIAAISDFRNAYQRQFCNLSRRIRLLAPMLEEAKEGPRPLSEASEAALQQLREALIGARELLRLGSNGSKIFLVLEREKIIQTFQDITARLEQALASISFDELDISDEVREQVELVHAQFKRAKERSDTSDDDIFNDLMFVYNSSTNANVDLDILLRLSEKLQLVTISDLNQESLTLHEMAIGGDPGAVVEKMSMLLKKIKDFVQTQDPVIGTPASTTDLSPKDNSTSPVVPDDFRCPISLDLMKDPVIVATGQTYERGCIERWLEAGHDTCPKTQQKLPNKSLTPNYVLRSLIAQWCEANGMEPPKRTAQLSNAPASCTASEHSKVIELLQKLSSQNLVD…	15	54009248	54014736	2142	714	5.05	76880.1	-	Nucleus	292-355
PePUB31	ClassⅡ	PH02Gene08110.t1	MANPRAVVASAPSSSGSSSSAFLPPPSPSDGDLLRSLHRLARDLSVVETPAPFLRAAFASISRRSKLLATAFDDLLLCISSVRDLPRSASLCLREVLLVMQRFKAVVADCSARSRMRLLLQSDEMDEELRGLHHDLATLLDLLPVVELGLAEDVTDLFALASRQCRRCSLAAEVEQAFKASVLSLIQEIEREIVPERERLEEILEEVGINDPASCRDEIESLEREIGDRASERWTPAMIALVGLLRYAKCVLFSATPRPSDSKADIEVEDGEPPAPPADFRCPISLDLMRDPVVVASGQTYDRESIDRWFRSDKSTCPKTGQVLANLELVPNKALKNLISKWCRENGVAIEACEASKSEPAPAVAANKAALEAARMTASFLVKKLSVSSSPDAANRVVH…	16	22435515	22437563	2046	682	6.2	73078	+	Nucleus	279-342
PePUB32	ClassⅡ	PH02Gene20682.t1	MDCYTGLMENFSPRNLLNSISRLGVVTSDGSTTRPKPIQKYCQNVFDISSIVNPLIEDLCKSPEEQLNEVLRELDTAINEASGLIGNWHQTTSKIYFVWQIESVISDIQGCSLQLCQLVNSLLPCLTGRACTCIEKLQDINYEHMFDLVKEVAMELTETDAASPENLLKVSSPLSLSTNLELYMEAVSLDSLRARAIRGENREELALVEQMIPLVNYMHERLLRETQLLNINGVPIPADFCCPLSLELMSDPVIVASGQTYERVYIKLWLDEGFTICPKTRQRLGHSNLIPNYTVKALIANWCESHDIRLPDPMKSLKLNFPSAASSLQDLSAAGSSPLHPSVAARANIPGSPEADLYMKSLNRASPPHIVVHQNSHAHVNRSGHEASSNQSAENANGS…	17	43192193	43195999	2508	836	5.47	90731.4	-	Nucleus	239-302
PePUB33	ClassⅡ	PH02Gene28061.t1	MATAEAAAEIVREIAAVGAADLASAAEPLRSDCLRLARKVSLLSHLVAEVAEAGASAWDAESGAWVAELVRALQAARRFVALGRRAPTTGASDQDAICNNIAVQFKYVTWQLQAALTNLPHSCFQISDEVQEEVDLVRGQLRREMEKKGDLDVNIFSKIHDILACHVDNVGSQSQQPHAQPETSQMENFCNDHLELQNIVLLVSEISGVSKSDTKKITSELVEEVENIRVTDSSKPVNVDSQSSAETKGSPDKVKKSDSVAIPEDFRCPISLELMRDPVIVSTGQTYERAFIQRWIDCGNRTCPKTQQKLQNLTLTPNYVLRSLILQWCEEKGIEPPTRSKNDGSSAEFGGDRVAIEALVRNLSSSSLDERKSAAAEIRSLAKKNTDNRILLAESGAIP…	17	14418857	14427847	1911	637	6.09	68958.8	-	Cytoplasm;Nucleus	265-328
PePUB34	ClassⅡ	PH02Gene16560.t1	MAAPASASSPVEFLLRRPPLPRRRPPLAGAFFAPTGLAGAPLLRALASLAAGLLAAPLPPSQPRNLAALVRRLALLSALLDSVLLDAPDSFSDAANLCFRELYVVLFRAELLVSYVASAGRAWALLRGPHLAASFRDLDAELAVVLDVLPDASLRLSPDATGHLELLRTHCRRREPAQYHDLAEAALRDRLLAAHRQFELDQRPDPSPLQSLLSHIGISDAASCCAEIEYMEEQILSQEEDTDLPLVGGVVALLRYCLFSLFDPGNAKAPQGWLSVGNRQRLLSWGSGDDSSFLVPKEFSCPISLDLIRDPVVVSTGQTYDRPSIIQWIEEGHSTCPNSGQALADNRLVLNRALRSLISQWCRVYGFQYDSPESNEGMAECVATACSSKAAIEANKATA…	17	79892861	79895026	2163	721	8.41	77808	-	Nucleus	298-361
PePUB35	ClassⅡ	PH02Gene37022.t1	MNLDGDSDQSNQERAFEAFMCPLTKEVMQDPVTIETGQTFEREAILKWFKECRDNGRKVTCPLTQRELRSTEISPSIALRNVIEEWRARNEEKELEKACNSLKLNLHSESESEDGTLRALALVYISQMCQRSGAKKNLVRSEGIVPTIAEMLKSSSRRVRLKSLQVLGVVVVDSDENKVGALLVSIMRKAGSSLPAREATLKALREISSNESSARMLLQAGILPPLVKHLFSVGVSDLHLPMRLKEVSAAILANLVASGAGFQSIPLDDDESSKRTLLSEDVVHSLLHLISNTGPAIECKLLNTLVGLTSSPATVAHIVSAIKSSGATISLIQFVEAAHREIRVESLKLLRNVSPYMGGEPADVLGGHLSSLVRAITDSTTPGVTEEQAAAVGLLGELP…	17	73385	75992	1878	626	5.61	67942.7	+	Nucleus	18-86
PePUB36	ClassⅡ	PH02Gene22972.t1	MRDPVVLASGQTYDRRFIQEWLSAGNRTCPQTQQVLSNTILIPNHLVRSMISQWCTENGITLPPLENQEEDLVTNNERKAFSEIFDRISSSSNISEQRQAIKDLRLLTKCNSSFRAVIGEKPDSISQMISLVSNSELENNAEVVEDTVTTILNLSIHESNKKIIGDDPKAIPFLIRALQSGAMEARSNAAAAIFSLSALDNNKAKIGELGAMRPLVDLLEHGSMIAKKDAASAIFNLCMLHENKSRATKGGVIDVTLKAISDESLMDESLAILALLSSDHETVEEIGETGGVPCMLRIIREDQCKRNKENAVAVLFSICMYDRTKLREVVEDENLNGSLAWLAQNGTSRARRKSAGILDKLRRTMHNTHYSSTLGLVHKITVSEQVVEVMIMNFSCIFA…	17	55807908	55811828	1227	409	5.8	45354.9	+	Nucleus	1-54
PePUB37	ClassⅡ	PH02Gene41609.t1	MEVSWPDDFRCPISLEVMTDPVILPSGHTFERRSIQRWLDGGHLTCPVTNLPLPPSPPLIPNHALRRLIAAVSPLAVSKAAVAGEKGGDGERQEVAPVSSSVSGLLRLAKSGAAGRREVLESGAAAVLLQHAAAGDEAAARAIVLLSLDGDDARVGLVADGAVDALSAAVSGGGAAAALAATALTSLATVDVNKCTIGAHPSAIPALAALLRRGGPRERREAATTLYELCKLPENRRRAVRARAAPALADLAAAGSARAVEVLGLLAKNRDGRQELSEIPDIVPVLSGVASGGNARAIEQALLVLNWICSESNALAMEAIKLGAFHLCEALVNDDNCKIAKNAVELARTLEKATAGPQPLVAAPVGIITLVTEEIRCALRTGGPCLPLMRAPELKD	18	15455485	15459608	1188	396	6.35	40832.1	-	Nucleus	4-67
PePUB38	ClassⅡ	PH02Gene31951.t1	MEQHRQASLRQAQESLDGYEGGGDGFDDAASEDGVLSAFVCPITMQAMRDPVLIETGHAFEQEAIARWFLECIDHGRRPCCPVTMREVYSTDLKPVMALRAAIEEWTDRWERSHLRKACQWLTKDASEKEALRALCYVMRGWNEGRVGKHVVRSEGMIPMVGAMLRSGSARVRLKALEALHEFAGETDEDREAVLEGDTIRTIMKFIDCEVCQERESAVSTLYELSKSELVCEKISGLNGAILILGKVAGSKADNPTVTKMAEKTLENLDMCEKNVVQMAENGRLEPLLNLLIEGSPEKQLLMASSLEKIVLSNDLKILVAQRVGLLFAGVVEKGSLESKKVAFKVLEHISANAESAKVLIEENVLLPLFRVLSINGIKSLPPRLQEGAAAVLCNLVAS…	18	22340667	22343646	2505	835	6.11	92326.7	-	Cytoplasm;Nucleus	8-72
PePUB39	ClassⅡ	PH02Gene03546.t1	MGARRPRRWKLPFQRSAPSSPSKSPPAPPPYSPARSAAEAEAGGKELEAVPPEFVCPILGALMADPVILPSGQTYERICLQACAELAFLPPGVGSGSDTMIPNSALKAAIGTWCARSGRAVPVPPSAETAREAVLHAMPPAAAAAAKSVRTRRAALASSSNSSYSSPASAASTSSYTSSSEITAAEEEVGVKPVKEAAKEVVQVEMAVDPLEDEVVAKVMDAEEGEVAAAIAALREATRESAERRRALCTPRLLAALRRVLLLPRHAAARAEAAAALVNLSLEPANKVRIVRAGAVPALVEVLRSGASAPEAREHAAGALFGLALNEDNRAAIGVLGAVPPLLDLLTSPAQPARARRDAGMALYHLSLAAINQSKVGRFPGAPKALLTVASSATEPTPI…	19	204218	205867	1647	549	8.46	57059.3	+	Nucleus	53-113
PePUB40	ClassⅡ	PH02Gene24340.t1	MANPTPVATVEEAAVLRRRLRRLVATVTAGGADGDAFDDAASALAALRDAELGRRKDSAGGGGGAGAGGKRASPEAAVPEQFLCPTSSEIMRDPVVLASGQTYDRRFIQEWLSAGNRTCPQTQQVLSNTILIPNHLVRGMISQWCTENGITLPPLENQEEDLVTNNERKASSEIFDRISYSSNISEQRQAIKDLRLLTKCNSSFRAVIGEKPDSISQMISLVSNRELENNAEVLEDTVTTILNLSIHESNKKIIGDDPKAIPFLIRALQSGTMESRSNAAAAIFSLSALDNNKAKIGESGAMRPLVDLLEHGSMIAKKDAASAIFNLCMLHENKSRATKGGVIDVTLKAISDESLIDESLAILALLSSDHETVEEIGETGGVPCMLRIMREDQCKRNKE…	20	6558967	6561339	1386	462	5.81	50132.9	+	Nucleus	81-144
PePUB41	ClassⅡ	PH02Gene26179.t1	MAAPASASSPVEFLLRRLPPRRRRPPLAGAFFAPTGLAGAPLLRALASLTAGLLAAPRPPSQPRNMVAFSRRLALLSALLDSLLLDAPDSFSDAADLCFRELYVVLFRAELLVSYVASAGRAWALLRGQHLAASFRDLDAELAVVLDVLPDASLRLSPDATGHLELLRTHCRRREPAQYHDPAEAALRDRLLAALRQVELGQPPDPSPLQSLLSHIGISDAASCLAEIEYLEEQILSQEDDTDLPLVGGVVALLRYCLFSLFDPGNAKAPRGWPSVDNRQRLLSWGSGDDSSFSVPKEFSCPISLDLMRDPVVVSTGQTYDRPSIIQWIEEGHSTCPNSGQALTDNRLVPNRALRSLISQWCGVYGFQYDSPESNEGMAECVATACSSKAAIEANKATA…	20	30569488	30571668	2178	726	8.11	78068.1	-	Nucleus	298-361
PePUB42	ClassⅡ	PH02Gene15746.t1	MDEESKPNPSEDANTNAAATTTAAAEAASPPPPLCSESAEGEEAPGDLVEQLVQLVDEIAVISDFRNAYRRQFCNLSRRIRLLAPMLEEAKEGPRPLSEASDAALRKLREALAGSRELLRLGSNGSKIFLVIEREKIIQTFQDITARLEQALAGISFDELDISDEVREQVELVHAQFKRAKERTDTSDDDLFNDLMFVYNSSTNANVDPDILRRLSEKLQLVTISDLNQESLTLHEMAIGGDPVAVVEKMSMLLKTIKDFVQTQDPVIGILASTTDLSPKDNSTSPIVPDDFRCPISLDLMKDPVIVATGQTYERVCIERWLEAGHDTCPKTQQKLPNKSLTPNYVLRSLIAQWCEANSMEPPKRTAQPSNAPASCTASEHSKVIELLQKLSSQNLVDQ…	21	85953935	85960251	2241	747	5.43	80511.6	-	Nucleus	291-354
PePUB43	ClassⅡ	PH02Gene23928.t1	MPPDERRSPHRRMLALPAVCPCEAISPGTLLTSLVSLAANVAGRDVDAFPALRRGVGLAGRITGVLLMFLEEVREASSAGTLPGAAVLGLSELHVAMQKLRFLLANCVRKGARLCMLMNSELVASELRVVLCSVAMAMDVLPGTWLGVRRGQGARGASVRASVACGGVPNADDGRAARSVRLMLAQFKSGATPDAMLVLCRVAITSWWDCTEEVSFLESELFERLEASGENGNDLVLISGLKAFMVYCRVVLFDRIDSKKAYAAVPSPRPENCAAWIIKEVLQCPITLELMTDPVTVATGQTYDRASIKRWMKNGCRTCPVTGEKLRSAEVVPNVAVHGIIEKLLVSNGSSLHERSGKHWCAVDKTATPFGAAAAGGVRLAVAFLIANLSQGTPEEQKK…	21	73623582	73627252	1980	660	8.96	70352.5	-	Nucleus	281-344
PePUB44	ClassⅡ	PH02Gene14324.t1	MPPPTLPPPSPADSEPSGAREMDDEDLVEELLATVNSARAFADFRRTQRKECLNLLRWLQLVLPLLEELRDSAPRLTENAYRRLALLGRAFAAARRLLRSCHDGSKIFLALESEAVLGRFRNVYEKMNTALDGMPYSELAISDEVMEQVELMNAQLMRCKRRTDTQDIELSMDLMVILQNKEDDRNADSAILERLAKKLELQTLADLRAETMAIKKLINERNGQHADSTKQMVELLNKFKEIAGIDEKSVLGEVSVPKSLDKCPSLMIPNDFLCPITLEIMTDPVIVASGQTYERRSIQKWLDSGERTCPKTRQPLAHLSLAPNYALKNLILQWCDKNKVELQKREPEPAAEQDEQRREDIPSLVEGLSSIHPDVQRKSAKKIRMLSKECPENRRLIAD…	22	12900449	12903418	1914	638	6.57	70729.8	-	Nucleus	271-334
PePUB45	ClassⅡ	PH02Gene44046.t1	MEVSEQASWPDDFRCPISLEVMTDPVILPSGHTFERRSIQRWLDGGHLTCPVTNLPLPPSPPLIPNHALRRLIAAVSAAAVEKGGDGERQEVVPASSSSVSGLLRLAKSGAAGRREVLESGAAAVLLRHAAAGDEAAARALVHLSLDGDDARVGLVADGAVDALSAAVSGGGAAAALAATALTSLATVDVNKCTIGAHPLAIPALAALLRRGGPRERREAATTLYELCKLSENRRRAVRVGAVPALADLAAAGSARAVEVLGLLAKNREGRHELSKIPDIVSVLSGVASGGNARAIEQALLVLNWICSESNELAMEAIKLGAFHLCEALVNDDNSTIRVDLDHKLSLEVVGLSHADCNHQLSCI	22	54409035	54414113	1092	364	5.9	37771.1	+	Nucleus	12-76
PePUB46	ClassⅡ	PH02Gene50722.t1	MAKPAPAEEEAAALRRRLRRLVATVTAGGAGADAFDEAAAALAALREAEVSGRKGGGGGEDRRSAEEATVPVELLCPISSKIMRDPVVVESGQTYDRRFIEEWFSAGNKMCPQTQQVLLSTTLIPNHLVRSMISQWCTENGFTLPPLENSEQKTFDEIFNKITSSSNIAERKQAIKDLRLLTKRNSEFRAVLGERPNSISQMIFARSTPGLQNDPHVLEDMVTIILNFSIHDSNKTIIGDDPEAIPFLIWALKSGDMGSRSNSAAAIFTLSALDSNKEKIGELGAMGPLIDLLEDGSIIAKKDAASAIFNLCLLYENKSIATRSGIVDVAMRAIEDQSLVEESLAILALLSSSHEMVEMITEFGGAACMLRSIRESECKRSKENAVVVLFSICMYNRTK…	23	50857343	50860732	1338	446	5.87	48704.7	+	Nucleus	73-136
PePUB47	ClassⅡ	PH02Gene34723.t1	MDGGFGPGVYDWSEEGIDEEDEPALRRRWARSPSPQPGLRPSRILGARPAAYSAPPNVDAAEVLDLFAGAETERKAKARDEFLEATMGASAGARTEEIKKGLLLNRKVVDLAGLERWLRRVEAVAELAWFTEMCSDEGKPVPPLDLFECAFRALRGAWSDELHRGADARRFWIGSVAVPEFFLCPVSKKVMENPVVITSGKTVDRSALEKWWNKNKRICPVTGEVLMHSIFIPNILIALCISLWHEANSITDLTTVTDAPVISSEEEVLFKKVTLLAHSPSSSKEAYDAILRLHELVNKDQWSFLHLIGRSPGTIAKLACILPETCLDPDPELDDIVLKIIAKAASYSPNKEVFGDDQYAIPVLIARALLGPVPTRAKCAQILGLLADNYYNKIKIGEL…	23	48864582	48867688	1713	571	5.4	63301.7	+	Nucleus	10-73
PePUB48	ClassⅢ	PH02Gene13751.t2	MDGGFGPGVYDWSEEGIDEEDEPALRRRRRRSRSPSPSPGLRPSRILGARAAAYSVRTNRRSIRLSDVPAGGGSSGGVPGWEDGGVEEIISSLRAMSARPRLFAPPDASASSASITGSGAEEEEEEGAEGEFSFPPFEAPPNVDAAAVLDLFAGAETERKAKARGEFLEATMGASAGARTEEIKKELLLNRKVFDLAGLERWLRRVEAVAELAWFTELCSDEGKPVPPLDLFECAFRALQGAWSDELHHGSDARRFWIGSVAVPEFFLCPVSKKVMENPVVITSGKTVDRSALEKWWNKHKRICPVTGEVLMHSIFIPDILIALCISLWREANSITDLTTVTDPPIISSEEEALFKEVTLLAHSPSNSREAYDAILRLHELVNKEQWSFLHLLGRSPGT…	24	24264164	24267322	1965	655	5.18	71874.8	+	Nucleus	266-329
PePUB49	ClassⅢ	PH02Gene03822.t1	MSPPPNHPKRRRLLTLPAVCPCEGIAPAPLFSSLLSLAADVASRMAADASAFPVLRQGVRQAVRLAGLLLAFLEEVQEATKMMALPSSAVLGLTELHVALQKMRFLLTDCARRGARLWVLVNAGLVASELRLVLGSVAAAMDVLPRSVVDASVEAGELAQLVTDQAWRAGVRPDAGDDLAARSVRSILDQFKSGVAPDAEDVRRVLGRVGVRCWSECSEEIAFLESELSARLEVGDENSSEVVLINILMAFLVYCRVVLFDHIDVNKADSAAPARPARCPEWIRPEALQCPITLDLMTDPVTVSTGQTYDRASISQWIKAGSRKCPVTGERLRTADVVPNAALRGIIELMLLSNGVSLPEPSARLRHGAVGNAGVPFGSAAAGAARLAVAHIVAQLSRG…	7833	5819	7926	1896	632	7.94	66960.3	-	Nucleus	287-350
PePUB50	ClassⅢ	PH02Gene03770.t1	MAMEPPHLFLCPISIELMEDPVTVSTGVTYDRHSIERWLFSYGRTTCPATMQPLANLDLTPNHTLKRVISSWLDRGSPSSSSSSSTSTSSLSSPAHELATPLSRMLEQERLRSALANLEETPFKVTALKNMRTCMAGDLAMQSNFVASGGIQVVGRVMAQALAESGVGGDFSMFTACEEAAAVLAVLPLSDEALVGFVLAPECMKPVMALLQRGSAEARLHAMNILTKISNAGVGIDDWTAGVGVDDVLKSLLELLSDEASTRLSSRAFDVLLDVVKRSRSGRAKAVEIGAVHVLVELLADADDRHVAERILLLLKRLCKCPEGRFAFAEHDLSVAAVARTMLRVSELATQLAVKVLWLVSVVAPLEKVLEDMVLTGAVAKLLGLLHVESTPSTKQKTV…	3	84574202	84577111	1290	430	6.81	46250.8	+	Nucleus	8-72
PePUB51	ClassⅢ	PH02Gene34160.t1	MWSNSANSAYDVAHLARFLLLPLSLTRRPACQYISLYFSAGSSPSFSPILHGALSASAWRRLPLPLAGPAPPLPPAPLSLPPHGLSTASPSPPVGSVPLALELDTAGVQVPWYFRCPISLELMRDPVTIATGQTYNRTSIESWVATGNTTCPITRSPLADFTLIPNHTLYRLIQEWCVAHRSLGVKRIPTPKQPVDPDLIRSLIAQGPGLPALRKLKALGRESDKNRVVMATHETRAALIEVAFGGGSEEVQVEAMAMLILVGMGETEAVEVVGREERMTRLRKVLGGQGTTLEAKGGGCGGRDLLPAHVNDGYFSVTNGILSSLGARNSNRRLQLRRFIVSPYDPRYRLWEHSLVVLVVYSAWVSPFEFGFLQNPDGMLAVADNTVNAFFAVDIALTF…	3	86074015	86083790	1476	492	9.49	54154.6	+	Chloroplast	113-176
PePUB52	ClassⅢ	PH02Gene05257.t1	MSSLLSRRARRVAAAPPAELELPLPPEFRCPISLDLMRDPVVGPTGITYDRAGIEAWLLAAAGRGTCPVTHTELRAEDLVPNHALRRVIQAWCVANRSRGVERIPTPRVPLTAAQAAEVLAEVDDAARAGDAARCSAAARGIRGLAREADRDRRCFASAGAARALAAAFASFSSDSSVLDDVLSALVLVMPLDEEAITAIGSSSASVAWLVSFAKHGDLLRRLQAVVVIQEVVSCSCSTSSLCNGSAIDLSANVEGIIEVLVKTIRDPICPQATKASLVAAYHLARSDEHAAARLAAAGLVPVLIELLVDGDRSTSEKALAALDPILAEATKEKATELLRLMRKYQTRGGECIDTMDFRGLKRVS	5	11539686	11541023	1095	365	6.55	38673.5	-	Nucleus	27-92
PePUB53	ClassⅢ	PH02Gene24791.t1	MVLPMSRTTRPVARLVPEIPLMRQGRQQVATGSEAAELVVPTHFRCPISLELMRDPVTASTGITYDRESVEGWLARGHATCPVTGRPVRLGDLVPNHATRRMIQDWCVANRARGVERVPTPKVPVGEADAAEVVAAMSAAARRGDAAPCGEAAASVRALGKESERNRRCLAAAGAARALSSALRHFAGQPVEGASAVSGVLGEILAALTMFFPLDEESRRCIASPASLKSLVSMLSHGELAARASAAVVLRELSSSADRHTVEAISRTHGMCSALVGLVRNPVSPQATKAALVTAYYLVSAADPAATLFAELGAVPVVVELLVDADKGTSEKAIAVLDGVLSTDAGLGSARAHALAVPVLVKKMLRVSDMATEFAVSALWRLCRAADADAAACRAEALR…	6	20505860	20507215	1353	451	9.1	47226.7	+	Nucleus	43-106
PePUB54	ClassⅢ	PH02Gene07322.t1	MEPAVAGQQARRRIRPPEPLVMAAAPAAFRCPISLEVMRSPVSLPTGATYDRASIQRWLDSGHRTCPATRLPLASTDLVPNLLLRRLIQLHAATLPPSPSPEEVLSQLAAADGEPAAAEKAVRLLAAKIVPEKGKQASVASAVAADLDSAVPALLSFAKGGAGADARVDAVRILATVAQKLVPYLTRDGTEKCGRVKMAVEALAAVLSADGVAEEAKEGLIAALVGGDLSRVVTTLLATGANGVVVLEAILTSPVPDADVKTPIADRSEIFQDLVRILKDAASPAAIRCMAAAVQVRGRPARASMVRAGAVPALALAVAAAPTAAAESALGLLVEAARCSDGKAAIAADAAEVAAAVMGRMIRVGPAGREAAVAVLWLACCAGGGERRMREAVAAAPEV…	7	28366819	28368264	1356	452	9.26	46416	+	Nucleus	28-91
PePUB55	ClassⅢ	PH02Gene22682.t2	MVLSMSRATRSVARVVPEIPLLRRGRQKAVAGSEAAELAVPTHFRCPISLDLMRDPVTAPTGITYDRESVEGWLARGHGMCPVTGRPVRLGDLVPNHVMRRMIQDWSVANRARGVELVPTPRVPVGEADAAEVIAAVSAAARRGDSAACGEVAARARALGKESERNRRCLSAAGAARALSSAFRHLAGEPVEGANAVSGALGEILAALTVFFPLDEESRRCIASPASLKSLVSLMSHGELSARASAAVVLRELASSADRHTVEAISRTHGMCDVLVGLVRNPVSPQATKAALVTAYYLVSAADRAAARFAELGAVPVVMELLVDADKGTSEKALALLDGVLCTDAGLGSARAHALAVPVLVKKMFRVSDMATEFAVSALWRLCSAADASACHAEALRVG…	8	23193390	23195114	1371	457	8.61	48049.5	+	Nucleus	43-106
PePUB56	ClassⅢ	PH02Gene30564.t1	MESLGGNGMPHHFVCPISLQRMQDPVTAPTGITYDRGAIERWLAAGHATCPVTGQPLSLADLTPNHTLRRLIHSWHSTTLAAAAAAPAEKLQQPAPPDPEVAALVAKLLCPSSCPSTDVLREAAAAASESAAARRCMVGAGVLRRVLRLVVSCAKKSSRDQLSLTMPTVEACLSLLDALDVSADELRPLVADNHDLVDALTQVLVTGSHAARESAVRLLEPITEAANAALLERLRPEHFRAVTAVLRDRLSPGATRAALRALLHACPNGKNRTLIAEAGAAHEAIELELAWWPPSPGRRVTELVMALLAQLCACADGRAAVAAHPAGIALVAKRVLRVSAAADACAVRVLAAVGGRAASPEVVWEMARVGAVGKLCCVLQADCDAAVKETARAVLKLHS…	12	7926446	7928313	1419	473	8.86	49480.8	+	Nucleus	12-75
PePUB57	ClassⅢ	PH02Gene19136.t1	MSSLLSRRARRVAELEVPVPAEFRCPISLDLMRDPVAGPTGITYDRASIEAWLFAAGQRGTCPVTHGELSAEDLVPNHTLRRVIQAWCVANSSRGVERIPTPRVPVTAAQAAEALAEVEDAARAGDAVRCAASARGIRSLALEADRDRRCFASAGAARALAAAFASFAPDSCVLDDVLSALVLVMPLDEEAITAIGSSSASVAWLVAVAKDGDLQRRLQAVVVIIEVVSCSCSSSCNGGAIDLSANVEGIIELLVDGDQSTAEKALAALDAALACEDGRAAVSADALAVPVLVKKMFRVSDTATELVVSALWRICKGCRDEEETATAARRRAVVEALQVGAFQKLLMLLQVGCKEATKEKATELLRLMSKHQSRGGECIDNMDFRGLKRVS	13	99268714	99270030	1173	391	5.41	41354.5	-	Nucleus	22-87
PePUB58	ClassⅢ	PH02Gene15462.t1	MALLARRARRAATKAAAAPPLGVELAIPAHFRCPISLDLMRDPVTAPTGITYDRESIEAWLDTGRAVCPVTHGPLRHEDLVPNHAIRRVIQDWALARDSERNRRCFVSIGTGRVLAAAFESLAAAGVPAGGLLEDVLAALVCMMPLDEEAPRILGSPSSLGSLVAIAKHGSLAGRLNAVLMIKEVVSCDGAFTDLSAKVDEIVDALVKIIKAPICLQATKAAMVATYHLARSDERVAARIATTGLVPVLVEVLVDTDKSASEKALAVIDAVLTSEEGRASARDHALTVPVLVKKMFRVSDLATELAVSAMWRLGKGSSDADEEDAVTRCLVEKLRVGAFQKLLLLLQVGCRDATKEKATELLKMLNKHKGVGECVDAVDFRGLNRLS	15	58823355	58824677	1161	387	7.59	41308.2	+	Nucleus	30-93
PePUB59	ClassⅢ	PH02Gene38547.t1	MASVPAEVPSYFLCPISLQLMRDPVTLPTGISYDRAAISRWLAGPARRTCPVTRQPLAPELQLTPNHTLRRLISSWLASLSPGSAVDEEVAALRPVSRNELASLLSDAAAAQVGALKKLRELVSECEDSRAMLESQDGVFDVLSRVVAGGSACSTAREEAVGVLATLRMPEQELVGVVSRHGNLAESLTAVLRSSNLQSREQAVLLVRSLADAAVPAWVIGLNQEFLAGVVRVVRDRISTRATKASLHALAALCPYGRNRAKIASAGAVPALVELLLDEPERRVCELALAVLDRLCTCAEGRAELVAHAAGVAVVGKKVMRVSETASERAVRVLRSVARHAATSAVLQEMAQAGVVGKLCLALRSEQCGVKTKEKAHEVLKLHSRVWRSSPCLSPKFLA…	16	15876488	15877699	1209	403	9.2	43056	+	Nucleus	11-76
PePUB60	ClassⅢ	PH02Gene41592.t1	MGRKEMSGRLSAKYQGLEVKVPTFFRCPNSLDVMRSPVSLCTDVTYDCASIQRWLDSGNTTCPATMLPLPSTDLVPNLTLHRLIALWASTAASSSSPTPSVVGPTPAATAAELLRQVVAPGADPFPALHKPVAFLSDDDVDELDKNALARAGSAAETVASVLRWREVDAAVEEAVRVLAVLAASDCIEEENKKRVATALAADAASSVASLARVMRSRSGLEARVDAARLVESLLRNATLGVKATAVEVGLSCLTAIAGTWCACSEMARLGAILAALCVLATDAGSPGQALRVLEVAVGCADECATICGKAEAAIPTVLSKMMKGGMGGTEAAVLSFSRKRPKGHI	16	83555802	83556918	1035	345	6.35	35817.4	+	Chloroplast;Mitochondrion;Nucleus.	24-87
PePUB61	ClassⅢ	PH02Gene01097.t1	MPGSVQLALELDTAGVQVPWYFRCPISLELMRDPVTVATGQTYDRASIESWVATGNTTCPVTRSPLADFTLIPNHTLRRLIQEWCVAHRSLGVERIPTPKQPADPDLIRSLIAQGPGLPALRKLRALGRESDKNRVVMATHETRAALVEVAFGGGGEEVQAEAMAVLALVGMGEAEAVEVVGREERVTRLGKVLGGQGTTLEAKVNAGAVVEAAASASGAEGRTVLGSAEGVLEGLVALVEEKANARAVRVGIRGLFALCLAKENRPRAVAAGAAAALARRVAEGGGAGETEHTLAAVERLCRTEGGRDAVVAGAGGGAAAVAALVRAMCGRAAEHAAGALVAVVGGSEALQVEAVRAGAMSQLLLMVQGGCSERAKRKAQHLLKLLRSAWPTADCIAN…	17	45666008	45667231	1221	407	8.13	42198.5	+	Nucleus	21-84
PePUB62	ClassⅢ	PH02Gene45472.t1	MVTPASRPRPRTFRGAARLVSEIPLAIRRTRQAEAPAEPAVPGHFLCPISLDMMRDPVTAPTGITYERDSLEGWLERGHATCPVTGRPLRLEELIPNHAMRRMIQEWCVANRALGVERVPTPRVPVSAADASDLLAAVSAAARRGDGPACQELVAKARALGKESDRNRRCFASAGAARVLSSAFCHLSGQPEATAMVASRALEEILAALVVFFPLDEESRRRIASPASLDSVMSILSHGELTARVSAVVVLREIAGSSDSQCLEALSKTNGVYDTLVKLLQKPVSPQATKAALVTAYYLVTNTEHAASRLIDLGMVQLLVELLVDSDKGTTEKALAVLDSLFLTDKGRDKAYEQALAVPVIVNKMQHVFDMATEFAVSALWRLCKNFTADGGCKIEALQ…	17	13576027	13577382	1353	451	8.26	48832.5	+	Nucleus	44-107
PePUB63	ClassⅢ	PH02Gene24221.t1	MEGPSAVEVPPYFLCPISLEIMRDPVTLATGITYDRCSIERWLFSDGRATCPVTQRPLAPPDREATPNHTLRRLIQAWCAAHAVERFPTPRPPVDSCRVAALVDEGRHGGRQQELAALREIKAIVAQSDRNKRCVEATTGAVDFLVSVVKNHSAAAISTSNLAEDFFESVLDSPTSTSSPEEDALSVLYSLKPSEKTLARILERNGDFLDTLASVLRRPTYRSRIYGILLLKAMASVMEPARLMAVSADLLQEVVRVVADRVSSKAVKAALHVLCRLCPWGRNRVKAVQAGAVAVLVELLLDEGGRRATELAVVAVDHLCGCAEGRSELVVHPAGLAIVSKKAMRVSLAATESAVRALHAVARHSATPAVLQEMLSVGVVAKLLLVLQVDSGERAGVRA…	17	46610892	46612485	1239	413	8.82	44649.7	+	Nucleus	12-78
PePUB64	ClassⅢ	PH02Gene45474.t1	MAMEPPHLFLCPISMELMEDPVTVSTGVTYDRRSIKRWLFKYGRTTCPATMQPLANLDLNPNHTLKRVISSWLDRGSPSSSSSSSPSTSSLSSPTHDPATPLSRMLEQERLRSALGNLEETPFKVMALKNMRARMAGDVAMQNDFVASGGIQVVGGVMAQALAESGTGGDFSAFTECEEAAAVLAVLPLSDEASVWFVLAPECMTPVMALIQRGSAEARLHAMDRRLDRGSRALDMLLDVVERSWSDRAKAVEVGAVHVLVELLADANDRHVAERILLLLKRLCKCPEGRLAFRSTTCRWRP	17	20313583	20314561	906	302	6.61	33112.2	-	Nucleus	8-72
PePUB65	ClassⅢ	PH02Gene44072.t1	MEGPSAVEVPPYFLCPISLEIMRDPVTLATGITYDRCSIERWLFSDGRATCPVTQRPLAPPDREATANHTLRRLIQAWCAAHAVERFPSPRLPVDSCRVAALVDEGRHGGRQQELAALREIKAIVAQSDRNKRCVEATTGAVDFLVSVVKNHSAAAISTSNLAEDFFESVLDSPTSTSSPEEDALSVLYSLKPSEKTLARILERNGDFLDTLASVLRRPTYRSRIYGILLLKAMASVMEPARLMAVSTDLLQEVVRVLADRVSSKAVKAALHVLCRLCPWGRNRVKAVQAGAVAVLVELLLDEGGRRATELAVVAVDHLCRCAEGRSELVVHAAGLAIVSKKAMRVSLAATESAVRALHAVARHSATPALLQEMLSVGVVAKLLLVLQVDSGERAGVRA…	17	46642504	46643784	1278	426	8.82	46294.7	+	Cell membrane;Nucleus	12-78
PePUB66	ClassⅢ	PH02Gene30670.t1	MGRKEMSGRLSAEYQGLEVKVPTFFRCPISLDVMRSPVSLCTGVTYDRASIQRWLDSGNTTCPATMLPLPSTDLVPNLTLHRLIALWASTAPSSSSPAPSAVGPSPAAAAAELLRRVAAPGADPFPALHKLAAFLSDDDVDEFDKNALARAGGAAETVASVLRRREADAAVEEAVRVLAVLAASDCIEEENKKRVATALAADAASSVASLARVMRSGSGLEARVDAARLVESLLRNATPDVKATVAEAEELVAELIRLIGPVDEKGSLDKQAVEVGLSCLAAIAGTRRARSEMARLGAVPAALRVLATDAGSPGQALRVLEAAVGCADGRAAICGNAEAAIPAVLSKMMKGGMGGAEAAVSVLWAVCHKYKDRRAVDAAAASKGGLTKLLLLMQSGCSP…	17	46174539	46175840	1299	433	8.29	44908.8	-	Nucleus	24-87
PePUB67	ClassⅢ	PH02Gene30685.t1	MPGSVPLALGLDTAGVQVPWYFRCPISLELMRDPVTVATGQTYDRASIDSWVATGNTTCPVTRAPLADFTLIPNHTLRRLIQEWCVAHRSLGVERIPTPKQPADPDIIRSLIAQGPGLPALRKLRALARESDKNRLVMATHETRAALVEAAFGGGGEEVEAEAMAVLALVGMGEAEAAEVVGREERVTRLGKVFGGQGTTLEAKVNAGAVVEAAAAASGAEARTVLGSAEGVMEGLVALVEEKASARAVRVGIRGLFALCLAKENRPRAVAAGAAAALARRVAEGSGAAEPERALAAVERLCRTEGGRDAVVAGAGGGVAAVCALVRAMSGRAAEHAAGALVAVLGGSEALQVEAVRAGAMSQLLLMVQGGCSERAKRKAQHLLKLLRYAWPTTDSIAN…	20	53332935	53334158	1221	407	7.61	42211.5	-	Nucleus	21-84
PePUB68	ClassⅢ	PH02Gene30681.t1	MEGSSPVEVPPYFLCPISLEIMRDPVTLATGITYDRCSIERWLFSDGRATCPVTQSPLAPPDREATPNHTLRRLIQAWCALHAVERFPTPRQPVDSCRIAALVDEGRHGGRQQELAALREIKAIVAESDRSKRCVEGTSGAVDFLVSVVKNHAAGNICTSKSAEHFFEFVPDSPTSTSSPEEDALSVLYSLKPSEKTLARILERNVDFLDTLLSVLRRPSYRSRTYGVLLLKAIASVMEPARLVAVSADLVQEVVRVVADRVSSKAVKAALHVLCRLCPWGRNRVKAVEAGAVAVLVELLLDEGGRSATELAMVAVDHLCWCAEGRSELVAHPAGLAVVSKKAVRVSPAATESAVRALHAVARHSAVPAVLQEMLAVGVVAKLLLVLQVGAGERARARA…	20	53036665	53038803	1230	410	8.76	44407.4	-	Nucleus	12-78
PePUB69	ClassⅢ	PH02Gene45716.t1	MGRKEISGRLAVEYQGLEVKVPTFFRCPISLDVMRSPVSLCTGVTYDRASIQRWFDSGNTTCPATMLPLPSTDLVPNLTLRRLIAIWASTAASSSSSVPSAIGPTPAAAAAELLRQSAAPSADPCPALRKLAAFLSDDDVDEFDKNALVRAGGAAETVASVLRRREADAAVESVEAAVRVLAVLAASDCIEEDNKKRVAAALAADVASSVASLARVLRSGSGLEARIDAARLVEALLRNATPDVKATVAEAEELVSELIRLVGPVDEKGSSLDKQAVEVGLSCLAAIAGTRRTRSEMVRLGAVPAAVRVLATDAGSPGQALRVLEAAVGCADGRAAICEKAEAAIPAVLSKMMKGGMGGAEAAVSVLWAVCHKYKDRRAVEAAAASKGGLTKLLLLMQS…	20	53186039	53187352	1311	437	8.44	45423.5	+	Nucleus	24-87
PePUB70	ClassⅢ	PH02Gene02301.t1	MSLLAWRARRAAKKAAAAPAPQLGVELAIPAHFRCPISLDLMRDPVTAPTGITYDRESIEAWLDTGRAVCPVTHGALRHEDLVPNHAIRRVIQDWALARDSERNRLCFVSIGTARVLAAAFESLAAAGVPAEGLLEDVLAALVCMMPLDEEAARILGSPSSLGSLVAIAKHGSLAGRLNAVLVIKEVASCDGAFMDLSGKVDEIVDALVKIIKAPICPQATKAAMVATYHLARSDERVAESIATTGFVPVLVEALVDTDKSASEKALAVLDAVLASNEGRASARDHALTMPVLVKKMFRVSDLATELAVSVMWRLGKGSRDADEEDAVTRCLVEALRVGAFQKLLLLLQVGCRDATKEKATELLKMLNKHKGVGECVDAVDFRGLNRLS	21	92376675	92378003	1167	389	6.47	41533.3	+	Nucleus	32-95
PePUB71	ClassⅢ	PH02Gene35046.t1	MAMESPQLFLCPISMELMEDPVTVSTGVTYDRRSIERWFFKYRKMTCPATMQRLASLDLTPNHTLKRVISSWLERASSSSSSRTDALTPLARERLPSVLAGIEETPFKVTALKNLKSCMAGDDAAQDDFVACGGIQMLGRVMTQALVESGAGGDFSAFRTCEEAAAVIATLPLSDDASVELVLKPECMRPLAELVQRGSAEARLHAMSIVAKISKASARDWTADVDVDDMVKSLLELLSDGASAKLSSRALDVLLDVTARSRGARRAKAVEVGTVRVLVELLPDADRHVAERALLLLKRLCKCPEGRLAFAEHGLAVAAVARTMLRASGLATRLAVNVLWQVVCAAAPAERVLDDLVVSGGVAKLLALLQVESSPSTKEKAVMMLRAHGALWRQYPCFP…	23	14156939	14158171	1230	410	8.01	44514.8	-	Nucleus	8-72
PePUB72	ClassⅢ	PH02Gene35051.t1	MVRKETATSMRLLSQYQGLEVKIPSFFRCPISLDVMRSPVSLCTGVTYDRASIQRWLDSGNTTCPATMLPLPSTDLVPNLTLRSLIAHWSTSAASCSPDASSATSAAGPSPARLVRQVATSDADPSTALRELAAYLSDDDVDEFEKNALVTAGRAAETVASVLRRKGEEISVEGVEAAVRVLAAIVASDGIEDANKKRVATGLAVDAAASAASLARVLRGGSGLEARIDAARLAEFLLANAAGEAKAAVAESSELVAELIRLIGPVDEKGSLDKKAVDTGLSCLAAISGSRRAARADMVRLGAVPAAVRALHATTEPGASAKALQILESSVRCAEGRAALCEDAEEAVPAVVGKMMKAGRDGAEAAVAVLWLVCHKYRDRRATDAAAASEGGLTRLLLL…	23	40380850	40382172	1320	440	6.91	45883.6	-	Chloroplast;Nucleus	26-89
PePUB73	ClassⅢ	PH02Gene05210.t1	MEGSPAPVDVPKYFVCPISLEIMRDPVTLSSGITYDRDSIERWVFTDGHGECPVTKQQLGAADRESTPNHTLRRLIQGWCAAHAVERFPTPRPPVDAARVAAILDAARQSGGQQDQLMASLREIADIVAESDRNRRCVEGAPGSVEFLLSVVKKHAASDTSKPLVSQEEMCGVLDSPKASSPEEAALSILHSLKLSEESLKRVLEGGDDFLDTLASVLQRPSYLSRTYAIHLLKAAVSAMPPARLTSVRAELVEGVVRVAADRLSAKAVKVALHVLCRLCPWGRNRVRAVEAGAVAALVELLFDDGCRSGNRACELAVVAMDHLCGCAEGRLELVAHPAGLAVMARAATRLSTAGTESVLRALHAVARHSATPAVLQEMLAVGVVARLLFLVQAGAAGD…	23	40662400	40663797	1248	416	7.61	44697.5	+	Nucleus	13-79
PePUB74	ClassⅢ	PH02Gene00263.t1	MSIPHLFRCPISLDIFTDPVTLCTGQTYDRPCIERWLAAGHRTCPVTMQPLGDTSVLVPNRTLRHLIERWLSTDPHHLPESPMAVDEEEPSLAALMRCLQPDATANAKVGALKKVMTLASESDVGRACMLQLGFLPVLLQLVFHGPVPSECHAEVEDLALQCALSLMPSSAVEPQLDCLNMLKKEANLASFVRLLERGNGRAKAGLCRLLETIATAASTRELALVVAASPRVWQALLPLLQQHDGPASDARASEAAVRAVAAICAAEPARGSAIHHGAVGVLFKHLSWASAANGGGAVSSALAAVEALAASEAGRRALARAPGAMRALVRHVFLMSTSNEGSEHAVAALLVVCRESPAARSEAVGAGVVTQLLLLLQSQCGARAKAKARAAALLKLLKSM	23	37120737	37121939	1200	400	8.24	42187.1	-	Nucleus	6-70
PePUB75	ClassⅢ	PH02Gene44203.t1	MERQVEVPPYFLCPISLHIMRDPVTLPTGITYDRDGIERWLLSAGTCPLTKQPVSPDCEPTPNHTLRRLIQSWCALHADDGVERLPTPKPPADRTCVAALVSQLAAKRSSPQELLASLRELKDVAAESERNRKLIAAVPGVVELLAAVFVASATTSENAAACDEALDVISSLQPSEQCLVRVIGRNETLFDALVATLQRSNTTSRTHAALLLEDVTAVMSPNRLVSLPEQVFREVVQLLRDKASKPATKAALHVMVVTTSWGRNRIKAVDAGAVPVLVDMLAEGPERRACELALGALDRLCGCAEGRAALVAHGAGVAVVGKKVLRVSDVASDKAVRVLRSVAKHAATAAVVQEMAQTSVVRKLCLVAQSEQCGERTRERARETLRLHARAWRNSPCLH…	24	71092865	71094091	1224	408	8.65	44160.1	-	Nucleus	8-72
PePUB76	ClassⅢ	PH02Gene00659.t1	MVRKDTATSMRLPLQHQALEVKIPSFFRCPISLDVMRSPVSLCTGVTYDRASIQRWLDSGNTTCPATMLPLPSTDLVPNLTLRSLIAHWSTSAASCSPAASSATSSAGPSPAGLIRQVASSDADPSPALRELAAYLSDDDVNEFEKNALMGAGRAAETVASVLRRKGEEISVEGVEAAVRVLAAIVASDGIEDANKKRVAAGLAVDAAASAASLARVLRGGSGLEARIDAARLVEFLLANAAGEAKAAVAESSELVTELIRLVGPVDEKGSLDNKAVDSGLSCLAAISRSRRAARADMVRLGAVPAAVRALHATTKPGASAKALRILESAVGCAEGRAALCEDAEEAVPAVVGKMMKAGRDGAEAAVAVLWAVCHKYRDRRAADAAAASEGGLTRLLLL…	24	33318171	33319493	1320	440	8.29	45652.4	+	Nucleus	26-89
PePUB77	ClassⅢ	PH02Gene48818.t1	MAMEPPQLFLCPISMELMEDPVTVSTGVTYDRRSIERWFFKYGKRTCPATMQRLASFDLTPNHTLKRVISSWLDRASSSSSTTDSPTPLARERLLSVLAGIEETPFKVTALKNLKSCMTGDEVAQDDFVACGGIQVLGRVMTQALAESGAGGDFSAFRTCEEAAAVLAMLPLSDGASVELVLKPECMRPVAALVQRGSAEARLHAMSIVANISKASARDWTADADVDDMVKSLLELLSDGASAKLSSRALDVLLDVTARSRGARRAKVVEVGAVGVLVELVPDANRHVSERALLLLKRLCKCPEGRLAFAEHGLAVAAMARTVLRVPGLATRLAVNVLWLVVCAAAPAERVLDDMVMSGGVAKLLALLQVESSPSTKEKAFKCSVGWFFYGADYSTGD	24	59569247	59570759	1194	398	6.48	42681.5	+	Nucleus	8-72
PePUB78	ClassⅢ	PH02Gene26524.t1	MEGSPAPVEVPKYFVCPISLEIMRDPVTLSSGITYDRECIERWVFTDGHGECPVTKLQLEAADREPTPNHTLRRLIQGWCAAHAVERFPTPRPPVEAARVAAIVDAVRHGGGQQDQLMASLRELADIVAESDRNRRCVEGAPGVVEFLVSVVKKHASADTSKPLVSKEDMCGVLESPKASSPEEAALSILHSLKLSEDSLKRVLEGGDDFSDTLASVLRRPSYLSRTYGIHLLKAAVSAMPPARLTSANAELVGGVVRVVADRLSAKVVKVALHVLCRLCLWGQNRVKAVDAGAVAALVDLLLDEGCRSGKRTCELAVVAMDHLCGCAEGRLELVAHPAGLAVVARAATRLSAAGTESAVRALHAVARHSATPTVLQEMLAVGVVARLLFLLQVGAAGD…	24	33148595	33150749	1254	418	7.98	44719.8	-	Nucleus	13-79
PePUB79	ClassⅢ	PH02Gene01972.t1	MGIPHLFRCPISLDIFTDPVTLCTGQTYDRPCIERWLAAGHRTCPVTMQPLGDTTVLVPNRTLRHLIERWLSTDPHHLPESPTAADEEEPSLAALKRCLQPEATANAKVGALKKVMTLASESDVGRACMLQLGFLPVLLQLVFHGPVTSECHAEVEELALQCALSLMPSSAAAPQLDCLNMLKREVNLASFVRLLERGNGRAKAGLCRLLETIATAAATRELALVVASSPRVWQALLPLLQQHDGPASDARASEAAVRTVAAVCAAEPARGSAIHHGAVGALFKHLSWASAAKGGGSVSSALAAVEALAASEAGRRAVARAPGAMRTLVRHVFMMSSSNEGSEHAVAALLDVCRESRAARSEAVGAGVVTQLLLLLQSQCGARAKPKARAAALLKLLKSM	24	37023994	37025196	1200	400	8.71	42251.1	+	Nucleus	6-70
PePUB80	ClassⅢ	PH02Gene24079.t1	MGRKEMSWRLSAEYQGLEVKVPTFFRCPISLDVMRSLVSLYTGVTYDRASIQRWLDSGNTICPATMLPFPSTDLVPNLTLHYLIALWASMAASSSSPAPSAVGPTPAAAAVELLRWAGGATETVASVLWRREVDAVVEEAVRVLAVLATSDCIEEENKKRVATALAADVASSVVSLARVMQSGSGLEARVDAARLVESLLRNATPDVKATITKAEELVVELIRLIGPMDEKGSLDKQAVEVGLSCLATIAGTRRARSEMPRLGAVPAALCAPRTLAPLARPSACWRRPSAAPTGAPRAVPLYAGRRRENSWRGGDADASIQRAAMSNQPGKHLVRLASRAVGSSSLRGGAALTPAAPSGRFCAHTGARTLRATSPPPLPCSIASAACWDSRALRLDGEE…	24	54209278	54212675	1977	659	5.31	70817.8	-	Nucleus	24-87
PePUB81	ClassⅢ	PH02Gene49698.t1	MVRAEPYPSNRPYQKKTPPLTHSHIPPSPTAHHPSPIAMEAVVAGQQARRRIRPPEPLLMAAAPPTPAAFRCPISLEVMRSPVSLPTGATYDRASIQRWLDSGHRTCPTTRMPLATTDLVPNLLLRRLIQLHAATLPPSPSSEEVLSQLAAADGEPAAAEKAVRSLAAKIAPEKGKRASVASAVAADLDSAVPALLSFAKGGAGADARVDAVKILATVAPELVPYLTEDGTEKRGRVKMAVEALAAVLSADGVAEEAKEGLIVALVAGDLSHVVTTLLATGPNGVVILEAILTSPVPDADVKTAIADRAEIFQDLVRILKDAASPAAIRCMAAAVQVRGRPARASMVRAGAVPALALAVAAAPTAAAESALGLLVEAARCSDGKAAIAADAAEVTAAVM…	2757	46149	47697	1470	490	8.94	50778	+	Nucleus	69-132
PePUB82	ClassⅢ	PH02Gene51283.t1	MVRAEPYPSNRPYQKKTPPLTHSHIPPSPTAHHPSPIAMEAVVAGQQARRRIRPPEPLLMAAAPPTPAAFRCPISLEVMRSPVSLPTGATYDRASIQRWLDSGHRTCPTTRMPLATTDLVPNLLLRRLIQLHAATLPPSPSSEEVLSQLAAADGEPAAAEKAVRSLAAKIAPEKGKRASVASAVAADLDSAVPALLSFAKGGAGADARVDAVKILATVAPELVPYLTEDGTEKRGRVKMAVEALAAVLSADGVAEEAKEGLIVALVAGDLSHVVTTLLATGPNGVVILEAILTSPVPDADVKTAIADRAEIFQDLVRILKDAASPAAIRCMAAAVQVRGRPARASMVRAGAVPALALAVAAAPTAAAESALGLLVEAARCSDGKAAIAADAAEVTAAVM…	3384	13844	15392	1470	490	8.94	50778	+	Nucleus	69-132
PePUB83	ClassⅢ	PH02Gene19161.t1	MPGSVPLALGLDTAGVQVPWYFRCPISLELMRDPVTVATGQTYDRASIDSWVATGNTTCPVTRAPLADFTLIPNHTLRRLIQEWCVAHRSLGVERIPTPKQPADPDIIRSLIAQGPGLPALRKLRALARESDKNRLVMATHETRAALVEAAFGGGGEEVEAEAMAVLALVGMGEAEAAEVVGREERVTRLGKVFGGQGTTLEAKVNAGAVVEAAAAASGAEARTVLGSAEGVMEGLVALVEEKASARAVRVGIRGLFALCLAKENRPRAVAAGAAAALARRVAEG	13861	1835	2689	855	285	6.86	29741.2	+	Chloroplast;Nucleus	21-84
PePUB84	ClassⅢ	PH02Gene18855.t1	MATAGSSSPPTPHADDSPEPSFSGEKVFVAVGRESRATLLWALHKFPQAAAFVLVHVYCPPKFLRVLGARIPASQLEEQKLIAYNKMELQRIHDSLDQYLLLCAEEKVRAEKLVVESDDVAKGLVDLISEHYVTVLVMGTAADKHYTKKMKVLKSKKARVVEQQADPVCKLWFICKGTLVYCRKDAPLSHEVMQEGSQKCGKPNLGPQIQRTSPYPSYDNEKEDVNEFDDNVFRHILRESESVRQEAHEEKCRREKAERELFEASQKAQASENLYFGELKQKNEIEEKLTTTMEEVESLTKTTDELCAKLQDEQEKRLALEKRSAHSDRIIKDLMLQRDKAVREAEALRVKKGESTATAEGTTHITELSCSEINEATNYFDHSLKVGESVYGSVYKGFL…	3	330843	335127	2223	741	6.18	83367	+	Nucleus	672-735
PePUB85	ClassⅣ	PH02Gene39022.t1	MMLRQRSLFTDKVFVALPEEPRDGKSILSWVIDHASDNTEIIIIHIVTVPNFESRKQNLDQYLDQCSRKKVKAEKRVFLFTKIDKGLLHLIKIYGVNKLVMGAASDKHYRRKMKAPQSQTAISVMQKAHTHCNIWFVCNGKLIFVREANHCLLTKSKSTRLPCAVDDSNMDLQCLLQPNIEAKRWEHMYIKEMELRKEVEAKLSQEKEGTEALKQATVMLQNELDWFTYQWNESVNRLQEVNQQKCCLEHRISESDSVASYLEESMRATESLVQSLKLEYNKVKLERDDAVKEARDMRIERELIAPCSNGPMSSEFSLMELEQATQNFSGSLNIGRGGFGSVYKGFLRNTTVAIKKLNSESLHGQSQFQQEVAILSRVRHPNLVTLIGACSEVSALVYE…	5	52324630	52330829	2127	709	6.62	79307.7	-	Nucleus	622-685
PePUB86	ClassⅣ	PH02Gene02969.t1	MRVAKTMATQDEAEINDPSPTVGLAVSSSKSSKYPVQWALKNFSGAKERVRFMLIHVLQKVTVVPTPMGNYIPIDKVRCDIASAYEKEIECQAQTMLLFYKNMCDEKVEAEVLAVKGDDVAETISNVVSAYQIHKLVVGVSSQGNFARKSKGTRVSSRICKSVPSFCTVYAVSKGGLSMVYSPGLEGGKCSELFQANESSNSELHSDDKPSTSDITPSRSSRSNLSWENLDSFSSADHDRPRSLHEYLTETENTSISIDDNNRSSIPCVSGQISGSSNLLISDKAPIISSPLRGLMLSEDKDDVNRELEKLRLELTHIKGVCKLVQDESIGASQHMTDLAARRAEEEAQLREVHSRINRVDKAARQEREQRCAVEAQARHVRDLAREEALQKQILQLRA…	5	53545198	53549354	2412	804	6.3	87945.1	+	Nucleus	723-785
PePUB87	ClassⅣ	PH02Gene02907.t1	MEIEEAAAGGEMMEMEAPSVSTVAIAVSGSKNSRHALKWALDKFVSEGRVLYLFRILYVRPTIKTVPTPMGNFIPISQVREDVASAYRKEAEWQASNMLLPFKKMCAQRQVEAEAGLLESDDVPAAISEEINKFNICKLVLGSSSKSIFRRKFKGSKTASKISECIPSFCTAYIVSKGKLSFVRSATSDTSETPKSISASTVSSSSRSFSSGAPSEWADTYGTANVSFCQPSLSSQRDQALANINKLPNRRASPSGSVGSESFYHDDTALTSSYSITSEVQFSSSSSGNSICKSFQRDNLPNQSDQASVSEIATNLTHSHDQDDLKIEIERLRVKLQHIQKLHEFSPVLLCSFQADHLQLILFQLEVLGKIRHPQLLLMLGACPEHGCLVYEYMENGSL…	6	8835546	8841545	2025	675	6.31	74567.2	-	Nucleus	608-670
PePUB88	ClassⅣ	PH02Gene12983.t1	MASSSSGGDPQAVVAVAVRGDGRGSRRAARWAAANLAPGPGRVVLVHVVPPVSFVPSPSGERVLVERMEAEVVEMYAQDRRARAQEVFLPFRRLCGRRSVETVVLEGDSVAEALVTYTAESGVRNLVLGSTSLSWFRRILRIPDVPSTVLKATSCSCNVFVVSRRRLTIKFANQARTGKSNTCVKIQSISNKAFAQIQRNWLQDKQSLHDLPDDETLKSSGDTGSDSCSQACSSLSISTNAGKSSESHGGGLLGSLGRKIPGREGNKDFDAIGQLKEVPHVALSSIEESQPIDEVAILRKELQDTLMMYDKACEDLVHAKKKIQVLSNECSEEASKKVQDAVQREELLKQAVANEKTKHLEAIREVDMAKESFTRKAYSKHKAELVANMVTTKKAKVVD…	6	45609069	45614695	2337	779	8.17	86315	+	Cell membrane;Chloroplast;Cytoplasm;Nucleus	709-771
PePUB89	ClassⅣ	PH02Gene38541.t1	MEIEEATGGGEMTEMEAPSVSTVAIAVSGSKNSRHALKWALDKFVPEGRVLFRILYVRPTIKMVPTPMGNFIPISQVREDVASAYRKEAEWQASNMLLPFKKMCAQRKVEAEAVLLESDDVPAAISKEINKFNICKLVLGSSSKSIFRRKLKGSKTASKISECIPSFCTAYVVSKGKLSFVRSATSDTGETPKSISSSTVSSPSSRSFSSSVPSEWADTYGTANVSFYQPSLSSQRDQTLANINKLSDRRASSSGSAGSERSYHDDTALTSSYSITSEALFSSSSSGNSIYKSFRRDNLSNHSDQASVSEIATNLKYSHEQDDLIERSKVKLRHLQKLHEFAQNESFDATQKLHKLGIQSIQDEIKLKEIELTEEKVRRLVRKKEREEQEAAKREAEFK…	8	4410924	4416544	2445	815	7.02	89450.5	-	Nucleus	735-797
PePUB90	ClassⅣ	PH02Gene20272.t1	MASSSVAGGEVAVAVRGDGRGSRRAARWAAANLAPAPGRVALVHVIPPVSFVPSPSGERVPVEGMEAEVVEMYAQDRRARAQEVFLPFRRLCGRRSVETVVLEGDSVAEALARYTVESGVRNLVLGSASLSWFRRILRLRDVPATVLKAMPCSCNVFIVSRHRITIKFANQARTGKSNTCVRIQSISHKAFAQIQRNWLQDKQSLHDLPEDDTPKSSGDTSSGSCSQVCSSLSTSTNAGKSLVSHGRGLLGSLGRKTPGREGNKDFDAIGQLKEVPYVSLSSVDESQPIDEVAKLRKELQDTLMMYDKVCEDLIHAKKKIQVLPNECSEETKKVQGAVQTEELLKQAVADEKTKHLEAVREVEMAKKSFTREVVDTLLSTGKSCRRYSRHEIYLATDNF…	8	54367000	54371974	2253	751	7.3	83222.4	-	Nucleus	684-746
PePUB91	ClassⅣ	PH02Gene38974.t1	MATARSSSPPTPHADDSPEPSFTGERVYVAVGRESRATLLWALHKFPKDAAFVLVHVYSPPKFLPVLGAMIPAIQMEEQELIAYKKMELQRINDSLDQYLLLCAQEKVQAEKVMVESDDVAKGLVELISKHHVTVLVMGVAADKHYTKKMKVLKSQKARVVEQQADLFCKIWFVCKGTLIYHRKAGPLSHEAMHEGRQKSSAAQSSVERSTSLSKMWCVSNTWLHKPNLGPHIESTSPYPSYDNEKQDVKEFDGSDNKSQHIFMELQSVRQEAYEEKCRREKVERELFEAFQKARDSENLYFGELKQKNEIEEKLTTTMEEVESLTKTTDELGAKLQEEREKTLALEKRSAHSNRIIKDLILQGDKAVREAEALRVKKGESTASAEGTMHITEISCSEI…	13	44266999	44271534	2301	767	6.46	86293.4	-	Nucleus	698-761
PePUB92	ClassⅣ	PH02Gene23333.t1	MVDILSRVRHPNLNLVTLIGSCKDAQALVYEYMPNGSLDYRLACKDNSKPLNWQLRTRIASNICSTLIFLHSSKPHSIVHSDLKASNILLDGNNVAKLSSFGAEQLARVGLRCCEIRRKRRPDLQTEVWTVLEPMLKSASVMLCSLSFKSVSEDLGGVPSYFIWPILQDVMREPLIAADGFTYEAEAIRECVHVLGDGVIYVGGVEPNDLYLCRSWLELSRMQAMEHGQLDGDGQLITYRLVGIHNRRRSLVQ	13	44204831	44207608	750	250	4.65	10800.3	-	Nucleus	27-90
PePUB93	ClassⅣ	PH02Gene23328.t1	MATAGSSSPPTPHADDSPEPSFTGEKVYVAVGRESRATLLWALHKFPKDAAFVLVHVYSTPKFLPVLGAMIPASQMEEQELIAYKKMGLQRINESLDQYLLLCAQEKVQAEKVMVESDDVAKGLVELICEHHVTVLVRGAAADKHYTKGTLIYHWKAGPLSHEAMHEGRQKSGAAQSSVERSTSLSEMWCVSNTWLHKPNLRPHIESTSPYPSYDNEKQDVKEFDESDYKFQHIFMELQSVRQEAYEEKCRREKVERGLFEAFQKARDSENLYFGELKQKNEIEEKLTTTMEEVESLTKTTDELCAKLQEEREKTLALEKRSAHSNHIIKDLMLQRDKAVREAEALRVKKGESTASAEGTMHITEISCSEINEATNNFDHSLKVGESVYGSVYKGFLRH…	13	44234039	44247316	2217	739	6.08	83080.4	-	Nucleus	670-733
PePUB94	ClassⅣ	PH02Gene23331.t1	MEKHLDEYIHQCSKMKVKGEKLVIESENVAKGITELVSLHSVTKLVMGAAADKHYSGKMKVPKSKMAVAVMQKADPSCKIWFVCKEHLISTREVGAPISLNTPSPAAIRSSMSTLSECGGPPNRYASNAVDGCVQRSMSEKVTPTAGRTLLRLPSRSTIRTTLSRLSLEEISVDSWDSVPRGSFPGSYRASSTVTNEVLSDSSSFEVPRDDASMILPSTLSECDFPNPAPYREQGDMDSNVDRFHKPEEDFAETEKYLKQAFDESLRRQKTEEELISYHQKAKKSEDVSLNDAKQRKEVEEALAKANEDIHLLKEEIDALKHNRDDIICKLSEVSEQKAALEQQVTEYGGIVNNLEDMVAASRSLIDARQLKFEQLKHERDNALKDAEELRREKQNMVS…	13	133633406	133637279	2370	790	5.93	88251.6	-	Nucleus	712-775
PePUB95	ClassⅣ	PH02Gene01616.t2	MAVVSARASPHSLPPSSPLPPLSPQSLPPSPQPDHERMFMRGGSGRSSNGTSRSTSLREIDEEAAVADDGGEKLYVAVGKDLKDGKSNLLWAARNIPQGVRQLVLLHVHQPAERIMSGLCKVHASQLEEKELKAYRTIEKEDMNTLMNQYLNYCKVFLKVQAEILVIEKNNAANGIIELIDQHCITNLVMGTSSFSTKRQVPRSRVASMVHQQAKPYCHILFICKEALAFSREANQDSTKADSPRSSSASSPSDQPEFPARSVSLPPGHPGYLSSPDQQVLPRRSNSVSYPSSGLIANNVEKMSPVEVHSIDLAPKNCSPNPSHRSTGESSPSSLKDLFGTDGSPAPVSIVSSEEHQHSMVETGIQNEVFEQLQQVRNDLERSRKEASEGRQKAERELF…	13	44297255	44306536	2622	874	5.86	97702.3	-	Nucleus	805-868
PePUB96	ClassⅣ	PH02Gene23334.t1	MEAAVLTAAAKEKVFVALPAEVKAGRSTLSWALSRFGDSGTTIVIAHVHVPPQMIPVMGVKFHANKLSPEQVSLFRRIERRKVNKLLDDYVHQCLKMKVKCEKLVFEKEDAVAGLVELVALHGVTKLVISAAADRHYSRKLDKPKSRTATEIMQRADPSCKIWFVCKEQLICTRDKEVEIAPPVTPLLPDFGHDILHLSPHQDEDDIELEFGFYDELKEACKAAENLMKRALKESSRRQKADEEVVSFLQKAKEYEELYLEEVNKRKELERALVRANREIAQLRQAIHLPKKQQNTTMEEKQQQNTTMEELQEAITKKLVLEQRIVDMHAELGATGQLIQPQQEYVQTQLDHDNGAREVEALLNQTKLTAFSPSSVIPSPLDEDCVPSYFVCPIFQEVM…	13	133688552	133690945	1383	461	6.02	52549.3	-	Nucleus	389-452
PePUB97	ClassⅣ	PH02Gene01619.t1	MSCRRGASSSSFSTSSLLLDEIDYSDLSSSHGDSSTEYSGYRSELLLALSNAKNISPAEHIQDLAPYHDLAEMDFDSDLQDRLQKAFDEIVKLKRENYEESCQRQQVEKELLMVRKKAKKLQDFLLKEQQHLKETEEARATDQCLIQTLKKENEWLKIRRDEYLEKSREESEHMLLQPLEEAKEAHEKHEQEMEILRKEIKQLKIQRGEYLAKYQEENEQKLTLVKCDSDNDHAGNALENDLAAYKCVLESVQKDYNQLQYEDTAIRDPEILCVNSQFSLAELKQTTENFSESLKIGEGGYGRVYKGSICNMTVAIKILRHNENLQGLLQFQREVLILSKLRHPHLVTLIGSCDEASALVYEYLPNGSLEDRLSCKGNTPALTWQVRTKIIGEICSALI…	13	133646171	133649031	1944	648	5.61	73776.8	-	Nucleus	581-643
PePUB98	ClassⅣ	PH02Gene01617.t1	MPPPLRTIKVARDEDLRSQIARDGHYFDLVDINRVRAFQVPVDTPIWRFKEELAEEFGTPVQFQRLWLWARRQNRTYRPERPLSPQEEKLSVGNLLSQSRCIAGDLELFLEVRNPRSPQILTREDLLLFLKLYDPEQTQLRYVGTLLVKCSSRPSDILPKLRSLADFCADEEIELYEEIAFEPSVMCEAIGIHDTFSYSQIGNGDIICYQKSLKSWNQHTYPYVELFFQHVHDLRDVASQFQRTGSAKKEEEQRKICSLEQEIIMLKRQSDVDRLQIEEAKMECNKLKHERDNAVRQVDELRDQNAQMILEFSFTVLEEATEHFKDLCKVGDTEYGCVYKGIIHNTTVAIKLSSSESLFKQEVSIIRQGRHPNIVTFIGICSEASALVFEWLPKGNLED…	15	29447712	29458949	2028	676	5.54	77114.7	+	Nucleus	604-667
PePUB99	ClassⅣ	PH02Gene20842.t1	MASSHPPPPPSPTVAVAVRPGGSAGRRAARWAAACLPGDGRAVSIAVVHVIPPLSFVPCPTGERVPVARVGREAAEAYARDRHARAQEALLPFRRLCGRANAAVETVVVEGIGVAEALVRYAEESGVRSLVLGSASFRWFRRVLSIPDVPTAVLKTTRNSCNVFVVSKRRLIMKVARHPQMSKANTNLRIQSISHKEFAQTQSSLLFDNFPENETYSDSCSQARNSHSSCSNAGPSSESHGQVLIGSLGAKTTGGAGNKTYGSLSPLMEDPYAASNSSDVCQPIDEVAKLRKELQDTLVMYDKACEDLVHSKKKIQVLSSECFEEARKVEHALQREETLKQVVADEKAKHLEAIKEVEQAKKSFTREAYSRNKAEMVASMISLDKAKIVDAILSTSKSC…	17	83865610	83872529	2349	783	8.46	86540	-	Nucleus	700-762
PePUB100	ClassⅣ	PH02Gene06110.t1	MPAEALNNEFSLFELEQATRGFDEALKIGEGGFGSVYKGSLRNTTVAIKLLHPQSMQGQSEFNQEVAVLSRVRHPNLVTLIGACREVFGLVYEFLPNGSLEDRLACINNTPPLTWQVRTKIIYEMCSALTFLHSDKPHPVVHGDLKPANILLDANFVSKLGDFGMCQLLIQSNTSTTTLYRTTTPKGTFAYMDPEFLSTGELTPRSDVYSFGIIILRLLTGRPPQRIAEVVEDAIEKGELHSVLDPSAGSWPFVQANQLAHLGLRCSEMSRRRRPDLAGEVWKVVEPLMKAASLTAGRPSFAAWSDDASTPSYFVCPIFQEVMSDPHIAADGFTYEAEAIRGWLDSGHDTSPMTNLKLAHCELIPNRGLRSAILEWQQQQHWQQQEGWR	17	25046045	25047438	1167	389	5.6	43361.3	-	Nucleus	313-376
PePUB101	ClassⅣ	PH02Gene43718.t1	MEGVGAIGLGREEEEDDHCAEQGERAARAVYCAVGKEAAKEWKANLQWVLANFPRTRCNRLVLAHVHRPASRINMMGAWVPVSQLAEQEVTAYRQLEEDKISKVLDDLLDICKSQKANASKIIIASDDIARGLVQLVDDHGVAELVMGAASDRGYTRKMRAPRSKKALMMQRKANPSCKIWFVCKGNLICTREVSEGLNRAESSTTSTSSRSSTSDYSGSKSSPRLPSEPFGISRHESTDTTTSSLDRTPSRDDNTTDHSIEDFNHDATVVAGSSTVLVSEIVEAEGESAVMQSLQEVEEDSPTPSQDGSDAGEMDDALYEKLKHVLMDAENLRHEAYEETRLRQKAERDLADASRMAMDAESSCQREAKHRKEIEERLARERSEMEQDRQELDDMLEQ…	17	1086298	1107397	2505	835	5.31	92815.2	-	Nucleus	768-831
PePUB102	ClassⅣ	PH02Gene16289.t1	MEGTGGAVHRRWDTSGSGSQYSFRTSVSRASDIVGEVMEVEEASPPVEDKVFVAVAEEVKYGKSTLLWALQNLAKDGAKVAIAHVHCPAQMIPMMGAKVHFTRMNQKQVNDYREKERGKAEEKLDEYVLICKRLKVSCEKLIIEKDDVAKGLEDLITLHGITKLVMGAAADKHYSRKMKTPKSKTALKLMETAALSCKIWFTCKGYVICTREANTTIPAIPPSPAPTVASTLSASSIFSNMRSMTIHQSESEASSSNGSPMHDLNRSRTEVTRYPSQGAGDTLSRQFEPFELNVNSRLTRTPVNSMDSWDEFGRRSQSSWYDLSRNHDAVSISGSAKRHPMQGSDDGHFSSPSRELENSGVDADMYGRLEEALREAQDSKKEAYEESSKRRKAERELIS…	17	25206756	25213679	2712	904	5.97	101559	-	Nucleus	828-891
PePUB103	ClassⅣ	PH02Gene43728.t1	MASGDPPPPPPSPTVTVAIAVRPGGSASRRAARWAAASLPGDGCAVAIAVVHVIPPLSFVPSPTGERVPVARVGREAAEAYALDRHARAQEALLPFRRLCGRANVTVETVVVEGDGVAEALARYAEESGVRSLVLGSASFRWFRRVLSIPDVPTAFLKTTRNSYNVFVVSKRRLIMKVARHPQMSKSNTSLRIQSISHKAFAQTQRSLLFDNFPENETHSDSCFHARNSHSSCSNAGPSSESDRQVLIGSLGAKTTVGAGNKNHGCLSPLLEDPYAASCSSEQRQSIDEVAKLRKELQDTLVMYDKACEDLVHAKKKIQVLSSECYEEARKVEHALQREEALKQVVADEKAKHLEAIKEVEQAKKSFTQEAYSRNKAEMVATIISLDKAKIVDAILSTS…	20	34438177	34442636	2322	774	7.79	85501.8	-	Nucleus	703-765
PePUB104	ClassⅣ	PH02Gene45728.t1	MDPFLYGVGPLHAAVRREHNDARVHVAVGRSPEKTLALLRWAFRRFACAHIYLLHVHRPSPVIPTLLGKIPAAQATEELVLSHRKSEKDEMNKILLTYLTFCHRAQVQASLLVTENEQIHDGIVTLVKVYGITKLVMGSMPDNCFKLKASYSKASFVAKNAPAFCEIWFVWRGRHIWTKEASAIIDNSISVYNQNDVMTRERIRFSSNSNDAESILEGYIKCGISRPADLHEGTASHNDRSNDYEALRADANHLYNMNISNLPDAESAFNSTFWPDSSVHMETLQLYSKEILDKSLNQVMMEAERSRKEAFAELLKRKETQSKVTNAFARAKASDSAQKREMKMREELAGLLVATRKQHEDLVKNKEKTTAGLDSSMRRLAILDACAKNIGLWMDEAAA…	23	3839283	3846180	2439	813	7.79	92172.7	+	Nucleus	746-809
PePUB105	ClassⅣ	PH02Gene37801.t1	MENMGSSQRNSCPKVHSSMCSELTMMLDKISSILPSIEAARPGCKAGIQELCNLYSIVEKGKLIIQHCIECSKLYLAITGEAIVSRCERIRDSLRRSLFLVQNMVPPALANQIAEVHNDLRDVKFVVDPMEQEAGKTILEMLRQSDATEELELETFLQAASKLNLTSPKAILIERRAIKKLLDKISGTDPKKEGVLKFFLYLVKKYGKKIKPDAGERNESLQTENQSLTPSLSFASDASTPGKCYTPTDFERYEDQSSISGAATLPAEFYCPISTKLMHDPVIIASGQTYERECIEKWFSEGYDTCPRTRIKLENFSMIPNTCMRDLICSWYMEHGSTISDFLPPGKNAYNYLPEQLHGHSVSSLHNVSVPLIAGNARDFVIDNSNSSVVLSDASYVSD…	3	86882235	86886067	2307	769	5.64	86147.9	-	Nucleus	268-331
PePUB106	ClassⅤ	PH02Gene31514.t1	MFALDYLSQVADVHNDLGDVKFIVGPAEEEAGKAILEMLRQSDASQELELQTFLLAASKLNLTSPKAILMERRAIKKLLDKINGSDPKKEGILKFFQYLVRKYGKNIKPETGVKNETVNAANGTLSTDLIASGNNATQRCFSPTNSGTGRFEYQNNLSGVATPPPVFCCPISTKLMSDPVIIASGQTYERENIQRWFNQGYDTCPRTQVKLENFTITPNTCMKAVICNWCKDHELECTYLPEQFNSYSLSSLHNVSAPLIAGENRDYMVDQSSSSFALSGARYISSPMRETEESKANCTQISSNANYQLYLSFCNFDKEMFLSFFHELSELPMELQSKAVKDLRSVLNGENQIWHSMISNGFLEAFLEFLKNDNERCTVQAQKTGMQFFLAFLSNSRTR…	6	65621364	65623586	1965	655	5.51	72370.8	-	Nucleus	166-229
PePUB107	ClassⅤ	PH02Gene37243.t1	MTVMAYCTKLKIIADNLRDLGSPSPVTEKDLVLNLLCGTRVSLHNAIPVLTMQSPFPSFLKTRSCLLLEEHHVAQSARMAQAAAFMAQAASGVIPPGFPIPAYFGLASQTPFSHAMPLPARSSRCGHFHQLLVHSSMCGELTLMLDKVSSILPSIEAARPGCKAGMEELCNLYNIVDKGKLIIQNCIECSSLYLAITGEATAMRCERIRNSLRRSLFLIQNMVADVHNDLRDVKFIADPAEDEAGKAILEMLRRSDASQELELQKFLLAASQLNLTSPKAILIERRAIKKLLDKINGNDPKKEGILKYFQYLVRKYGKNIKPETGVKNETVNAANGTLSTDLIASGANTPQKCFSPTNSGSRRFEDQNNLSGVATPPPEFFCPISMKLMCDPVIIASGQ…	8	38221215	38224217	3255	1085	5.78	73479	+	Nucleus	175-238
PePUB108	ClassⅤ	PH02Gene46287.t1	MDAMEAEEGPFLANDAKLHAGMCRAFHPAVSKLLAIFPFIEASRPRSKSGIQALCSLHVALDKAKGLLQHCADCSRLYLAITAETVLLKFEKSRSQLQESLRRVESIVTEDIGCKIVEIAGELEEVVFTLDQSEKEAGDEVINLLQRNRKLNSSSDSGELEVFHMAALKLGITSSRAALTERRALKKLIEKARSDEDKRKESVVSYVYNLMRKYSKIFRSEAGDDTDSQGSSPCSPTVLGMDDMYGPCGNGRAFSRQFSSIQSSNSRFGSFNSRLGSFNCRRSGPRSENMSIPPEELRCPISLQLMYDPVIISSGQTYERVCIEKWFNDGHSTCPKTQQQLAHLSLTPNYCVKALIASWCEQNDFPVPDAPPGSFDVNWRLAFSDSEATGCVSVESFDS…	14	77793796	77796985	2385	795	6.1	87443.3	-	Nucleus	296-359
PePUB109	ClassⅤ	PH02Gene40392.t1	MPQYQELPCGGQVLDIDTALKDGILGFGPEPGDGAAADGGKQPVELRKMMDELDPAGDGGGDETVPAVFICPISLEPMMDPVTLCTGQTYERANISRWLALGHRTCPTTMQELWDDALTPNATLQQLIAAWFSRRYTRFKKRSADFHGRAVELVHGLRGTAVPKKQPLKGQARVAALRELRSLASTHQSVTKAIAEAGGVALLTSLLGPFTSHAVGSEAVAILVSGVPLDAGAKAALMQPAKVSLVVDMLNEGAVDTKINCVRLIRILMDEKDFRPETVASLSLLAGAMRLVRDKRHPDGLAAGLELLNSICAVHKPARSMIVSIGAVPQLVGLLPELATECVEPALDILDALGAVPEGRMALKDCPRTIPNAVRLLMRVSEACTRRALSMLWVVCRMV…	15	61179489	61180868	1377	459	7.01	48970.3	-	Nucleus	68-131
PePUB110	ClassⅤ	PH02Gene29837.t1	MDAMEAEECPFRANDAKLHAGMCRAFHPAVSKLLAIFPFIEASRPRSKSGIQALCSLHVALDKAKCLLQHCADCSRLYLAITAETVLLKFEKSRSQLQESLRRVESIVTEDIGCKIVEIVGELEEVVFTLDHSEKEAGDELINLLQRNRNLNGSSDSGELEVFHMAALKLGITSSRAALTERRALKKLIEKARSDEDKRKEFVVSYLYNLMRKYSKIFRSEAGDDIDSQGSSPCSPTVLGMDDMYGPCGNGRAFSRQLSSIQSFNSRFGSFNSRLGSFNCRRSGPRSENMSVPPEELRCPISLQLMYDPVIISSGQTYERVCIEKWFNDGHSTCPKTQQQLAHMSLTPNYCVKALIASWCEQNDFPIPDAPPGSFDVNWRLAFSGSEATGCVSVESFDS…	16	10706814	10709985	2385	795	6.41	87845.1	+	Nucleus	296-359
PePUB111	ClassⅤ	PH02Gene09465.t1	MENMGSSQRNPCPKVHSSMCSELTMMLDKISPILPSIEAARPGCKAGIQELCNLYNIVEKGKLIIQHCIECSKLYLAITGEATVSRCERIRDSLRRSLFLIQNMVPPALANQIAEVHNDLRDVKFVVDPMEEEAGKTILEMLRQSETTEELELETFMQAASKLNLTSPKAILIERRAIKKLFDKISGTDPKKEGVLKFCFHLVKKYGKNITGERNENLQAENQSLTPSLRFASDASTPGKCYTPTDFQRYEDQSSISGAATPPAEFCCPISTKLMQDPVIITSGQTYERECIEKWFSEGYDTCPRTHIKLENFSMIPNTCMRDLICNWCKEHGSTTSDFFPPSKNTYSYLPEQLHGHSVSSLHNVSVPLIAGNARDFVIDHSNSSIALSDASYVSDSSH…	17	18002288	18005927	2298	766	5.37	85937.4	+	Nucleus	265-328
PePUB112	ClassⅤ	PH02Gene22033.t1	MEELLDAVEKEIQESYRARDRAEGSQDSSSSAPPSPSRLWRGAREAAKRILGIAKNSSPAPRSAARILHEEQASPDVAGTSRSAAEEAARTGSEDEARSQSAQQPVALTRSEYAAMMRSALAKIQEGAAAGDEGEAAFAEMERAMTGLMDLTYGNVVEPPKLPYEFATKWPHADADPLHGRVMDDPVILASGYSVDQSYQQWFSPQKNTCPVTNHSLPHSLTVPNHLLHDMIAAWCLDHSILPQSTTADTLAVPLAPSEEQIQDILENFSGNSTLQQEALHLIQLLSKTSKGVQPCLDKWPDLIPVVIDLKKKWKSTWTRDLEEERLTVVLNLSMHRPNRVILAGQNKLPGVLKKVVEKADRLGSSASCLAKVASLVSILSEFEMFRKRMLDIGGMKML…	17	55422769	55434327	3204	1068	5.96	117536	-	Nucleus	176-235
PePUB113	ClassⅤ	PH02Gene39367.t1	MPQYQELPCGGQVLDIDTALKDGILGCGPEPGDGAAGDGGKQPVELRKMMDELDAAGDGGGDEAVPAVFICPISLEPMVDPVTLCTGQTYERANISRWLALGHRTCPTTMQELWDDALTPNATLRQLIAAWFSRRYTRFKKRSADFHGRAAELVHGLRGTAVPKRQPLKGQARVAALRELRSLASTHHSVTKAIAEAGGVALLTSLFGPFTSHAVGSEAVAILVSGVPLDADAKAALMQPAKVSLVVDMLNEGAVDTKINCVRLIRILMDEKGFRPETVASLSLLAGAMRLVRDKRHPDGVAAGLELLNSICAVHRPARSMIVRIGAVPQLVELLPELATECVEPALDILDALAAVPEGRTALKDCPRTIPNAVRLLMRVSEACTRRALSMLWVVCRMV…	21	96047840	96049219	1377	459	7.47	49033.3	-	Nucleus	68-131
PePUB114	ClassⅤ	PH02Gene43585.t1	MSPAADGAAASKRQAELLKQEGNVFFKKDRISAAIDAYTGAHYMLGLALLNKQELAKGIKELEKSLELGRGAHPASYMVEEIWQELSKAKYIEWESLSTERASQLHKLKVACKEALRNYNSLDNPAADVSEEQLNELEEVFRKAAKTDTPIEVPDHLCCKITLDVFRDPVITPSGITYERAVLLDHLHRVGKFDPVTREALEPHQLVPNLAIKEAVHAFLSEHGWAYKMRTKGHYDSKDRFGLGGRDKVRWIRDDLGSLDYSIDAVLATRPKGTVRIGLDIGGGSGTFAAHRGDTHHVHEQLDRVAGARADAPQRRAPAALLRQHARNRALDARAQQLDPRRDVRVHAIRHLPGAPAPGGLFWLDRFFCLGTQLDANYVPMFDRIGFNKLRWNTGRKLD…	22	57450583	57457605	1281	427	8.41	47700.3	-	Chloroplast;Nucleus	156-219
PePUB115	ClassⅤ	PH02Gene11349.t1	MGLRVGDWEESGSWNLEVYVWLALTAECALTKFEKARNALLESLHQVEETLPEAINSQIPDIAHELENVVFALDQSEKQVGDEVNQLIQNEKKSNGFLDDNELDFFRQTAFRVGIASSAAALTERRALRRLLERARAEEDTKKESIASYLLHLMRKYSNLFRSETTDYTNSQCSSPSCSSSSVSSSLDLHGNSHALERHLPRAGSFNLRQIKGLSGSMPLPPEELRCPISLQLMYDPVVIASGQTYERACIEKWFNSGNTTCPKTRKQLSQLSMTPNYCIKGLIASWCEQNGVLVPSAPPESPKLKYLRIASLKSSQCLVTNGVSTVLFEDTGAKDDVKLDSEVALEKRSRQNSEEAVSEICEVEVSPEKCSHQNSGEAAPERCERWLSVLNKNGGCIH…	23	29813606	29820717	2139	713	5.9	79004.1	-	Nucleus	224-287
PePUB116	ClassⅤ	PH02Gene03219.t1	MERVDVDGDFIIAGNWKLHGALCKKLYTVVHEVLDVVPALETTRPGSSSGLLALSSLRIAVENAKNLLQYCSECSKLYLALTAESVLTKFEKARHALLESLHQVEETLPEAINSQIPEIAHELENAVFALHQSEKQVGDEVNQLIQSEKKSNGFLDDNELELFRQTAFRVGIASSAAALTERRALRRLLESAHAEEDTKKESIASYLLHLMTKYSNLFRSETTDYTNSQCSSPSRSSSSVSSSIDLHGNGHPPERHLPRAGSFNLRHIKGLSGSMPLPPEELRCPISLQLMYDPVVIASGQTYERACIEKWFNSGNTTCPKTRKQLSQLSMTPNYCIKGLIASWCEQNGVLVPSAPPESPKLKYLRIASLKSSQCLVTNGVSTVLFEDIGAKDDVKLDS…	24	45649883	45657850	2397	799	6.25	88123.6	+	Nucleus	281-344
PePUB117	ClassⅥ	PH02Gene10845.t1	MAGPTPTYSAVVAHTAAFLADLIADPLLRRHLLSAAAAADGGGGHQHPAATLQALSLVSDALDTTASASPSPASLRAAERLLQSLPAANPLSCLLLALASAARRRGGAPAAAAAVLDLFALDPALARHELAPAAFEALFAPRLLPVMRHFASRRTSAAAAAAAASQDDEEKSVEAAALSAMRVLSLMSGAQAQEMRALEREYEKVLDVNCKAYALYLKKILEAGEAARVSSPPPPPPELVFTVGDGLDHNADEDATAETDEAVSSQNGVRNNPIWAELDEPGDLYPRQGSGKGRRELMRPPSLYPQRVPPHLIVKQQQSIGRGSPTSGLQAEHSTVAPSDDSMEDSSSELYAGKEEKHTASPLSTPRGAQPRGDDDGTRLSPDTASSPMGGDADLARQQ…	14	89850023	89871148	4077	1359	5.65	146453	-	Nucleus	407-471
PePUB118	ClassⅦ	PH02Gene07653.t1	MGELEGRSGFLLGLEEEKFRQSQARIRELKKQVANLGDGLTMEVKLMKRREEMLVRREVQRFRGLYGFDYGAIRFLATQVLFMYDLKEGEQCKLLSEVFTKVTLVNTPTDVPGYLCCQITFEIFRDPVITPSGVTYERAILLEHLRKVGNFDLVTREPLKEHQFVPNLAIKEVVQAYLKEHSWAYKLT	13	30015800	30019455	564	188	8.38	21881.5	-	Nucleus	114-177
PePUB119	ClassⅦ	PH02Gene04759.t1	MGELEGRSGFLIGEMPPINRLNSILGLEEEKFRQSEARIRELEKQVANLGDGLSMEVKLMKRREEMLVRKEPINVRLCYVKDGMREGGDACKKGDSDETTNEYSEQCKLLSEVLTKVTLADTPTDVPGYLCCQITFEIFRDPVITPSGVTYERAILLEHLRKVGNFDPVTREPLKEHQLVPNLAIKEAVQAYLKEHSWAYKLT	17	88554881	88558650	609	203	5.44	23114.6	-	Nucleus	129-192
PePUB120	ClassⅧ	PH02Gene12681.t1	MEAAGDERVAEAQREKKAGTAAYRKHFFETAVDHYTRGASLDPRDISFLTNRAAAYLHLAKYKECVRDCDEAVERGRELRTDNRLVARALSRKASALLKLAGCSGDYAPAIRALQQSLAEHYSEETRAKLDEAESARKELEEQERLDQEAADHHREKGNEFFKQKKYQEAAAQYTKAMKKNPNDPRVFSNRAQCHIYLGALPEGLEDADKCIELNPTFLKGYARKAKVQFLMNNYENALATYLEGLKCDPNNLEVLDGLRRCAACIKRDNGGNVGPENLEEILGDFCSDDDLRNKLQKSMEEAAVFKKEASDERLRRIESERMARTLEDLYLSQVQQRKETEESLSRVEQELEQLKIQKDELAEKLQKADEHNEHLQGQLSESREHYDWLLSEHDHLLH…	8	7394545	7399272	2409	803	5.64	91023.7	-	Nucleus	732-795
PePUB121	ClassⅧ	PH02Gene25744.t1	MAAADGVARQAELRRIEGNACFNKARLGAAIDCYTEAIALCPDVAVYWTNRGLCHFRRKDWAKVEEDSRRALALDGSLVKGHYLLGCALLEKDECPLAVKEFEKALDLLKSSNSRDKMAEDIWQLLAKAKYLEWEKHSTQRVWKMQTLKEACENALQEHHFLSGTLVEDSDGTTNEYSEQCKLLSEVFTKVTLADTPTDVPDYLCCQVTFEIFRDPVITPSGVTYERAILLEHLRKVGNFDPVTREPLKEHQLVPNLAIKEAVQAYLKEHSWAYKLTAMAAPESSRAAGSVLLFPSSSPSPSSARVEAVVVFNICDSYGRRPDQAERVIGTLLGSVLPDGTVHVRNSYVVPHSESADQVALDIEYHHNMYASHHKVNPKEVIVGWFSTGFGVSGGSTLI…	9	581388	587746	1707	569	5.48	63413.1	-	Nucleus	203-266

## Sheet: Table S2
Table S2 Accession numbers used in the phylogenetic analysis
Sub-Class	Protein Name	Genomic Locus	Accession
Class I	AtPUB1/AtUFD2	AT5G15400	NP_568313
Class II	AtPUB2	AT5G67340	NP_201535
Class II	AtPUB3	AT3G54790	NP_191039
Class II	AtPUB4	AT2G23140	AAB87116
Class II	AtPUB5	AT4G36550	CAB80321
Class II	AtPUB6	AT1G24330	NP_173843
Class II	AtPUB7	AT1G67530	NP_176920
Class II	AtPUB8	AT4G21350	CAB79134
Class II	AtPUB9	AT3G07360	AAL91644
Class II	AtPUB10	AT1G71020	AAL91637
Class II	AtPUB11	AT1G23030	AAO00878
Class II	AtPUB12	AT2G28830	AAC79587
Class II	AtPUB13	AT3G46510	AAM91213
Class II	AtPUB14	AT3G54850	AAM20180
Class II	AtPUB15	AT5G42340	NP_199049
Class II	AtPUB16	AT5G01830	NP_195803
Class II	AtPUB17	AT1G29340	AAL36401
Class II	AtPUB18	AT1G10560	AAL77690
Class II	AtPUB19	AT1G60190	NP_176225
Class III	AtPUB20	AT1G66160	AAL34278
Class III	AtPUB21	AT5G37490	NP_198565
Class III	AtPUB22	AT3G52450	NP_190813
Class III	AtPUB23	AT2G35930	AAD21464
Class III	AtPUB24	AT3G11840	NP_566402
Class III	AtPUB25	AT3G19380	NP_566632
Class III	AtPUB26	AT1G49780	NP_175400
Class III	AtPUB27	AT5G64660	NP_201271
Class III	AtPUB28	AT5G09800	NP_196542
Class III	AtPUB29	AT3G18710	AAO63423
Class III	AtPUB30	AT3G49810	NP_566927
Class III	AtPUB31	AT5G65920	AAM13258
Class IV	AtPUB32	AT3G49060	AAK91387
Class IV	AtPUB33	AT2G45910	AAC28534
Class IV	AtPUB34	AT2G19410	AAM14871
Class IV	AtPUB35	AT4G25160	CAB79425
Class V	AtPUB36	AT3G61390	AAO63431
Class V	AtPUB37	AT2G45920	AAC28533
Class II	AtPUB38	AT5G65200	NP_201323
Class II	AtPUB39	AT3G47820	AAM14040
Class II	AtPUB40	AT5G40140	NP_198830
Class II	AtPUB41	AT5G62560	AAM91572
Class II	AtPUB42	AT1G68940	NP_177060
Class II	AtPUB43	AT1G76390	NP_177765
Class II	AtPUB44	AT1G20780	AAM20387
Class II	AtPUB45	AT1G27910	AAM19837
Class II	AtPUB46	AT5G18320	NP_197333
Class II	AtPUB47	AT5G18330	NP_197334
Class II	AtPUB48	AT5G18340	NP_197335
Class II	AtPUB49	AT5G67530	AAN46760
Class IV	AtPUB50	AT5G65500	NP_201353
Class IV	AtPUB51	AT5G61560	NP_200964
Class IV	AtPUB52	AT5G61550	NP_200963
Class IV	AtPUB53	AT5G51270	NP_199940
Class V	AtPUB54	AT1G01680	NP_171674
Class V	AtPUB55	AT1G01660	NP_171672
Class V	AtPUB56	AT1G01670	NP_171673
Class V	AtPUB57	AT1G56030	NP_175999
Class V	AtPUB58	AT1G56040	NP_176000
Class VI	AtPUB59	AT1G04510	AAN13133
Class VI	AtPUB60	AT2G33340	AAB80652
Class VII	AtCHIP	AT3G07370	NP_566305

## Sheet: Table S3
Table S3 Collinearity relationship among PUB genes in Phyllostachys edulis
Gene name	Gene identifier
PePUB01	WGD or Segmental
PePUB02	WGD or Segmental
PePUB03	WGD or Segmental
PePUB04	WGD or Segmental
PePUB05	WGD or Segmental
PePUB06	WGD or Segmental
PePUB07	WGD or Segmental
PePUB08	WGD or Segmental
PePUB09	WGD or Segmental
PePUB10	WGD or Segmental
PePUB11	WGD or Segmental
PePUB12	Tandem
PePUB13	WGD or Segmental
PePUB14	WGD or Segmental
PePUB15	WGD or Segmental
PePUB16	WGD or Segmental
PePUB17	WGD or Segmental
PePUB18	Dispersed
PePUB19	WGD or Segmental
PePUB20	WGD or Segmental
PePUB21	WGD or Segmental
PePUB22	WGD or Segmental
PePUB23	WGD or Segmental
PePUB24	WGD or Segmental
PePUB25	Dispersed
PePUB26	WGD or Segmental
PePUB27	WGD or Segmental
PePUB28	WGD or Segmental
PePUB29	WGD or Segmental
PePUB30	WGD or Segmental
PePUB31	WGD or Segmental
PePUB32	WGD or Segmental
PePUB33	WGD or Segmental
PePUB34	WGD or Segmental
PePUB35	WGD or Segmental
PePUB36	WGD or Segmental
PePUB37	WGD or Segmental
PePUB38	Dispersed
PePUB39	WGD or Segmental
PePUB40	WGD or Segmental
PePUB41	WGD or Segmental
PePUB42	WGD or Segmental
PePUB43	WGD or Segmental
PePUB44	Dispersed
PePUB45	WGD or Segmental
PePUB46	WGD or Segmental
PePUB47	Dispersed
PePUB48	WGD or Segmental
PePUB49	Dispersed
PePUB50	WGD or Segmental
PePUB51	Tandem
PePUB52	WGD or Segmental
PePUB53	WGD or Segmental
PePUB54	Dispersed
PePUB55	WGD or Segmental
PePUB56	WGD or Segmental
PePUB57	WGD or Segmental
PePUB58	WGD or Segmental
PePUB59	WGD or Segmental
PePUB60	Dispersed
PePUB61	WGD or Segmental
PePUB62	WGD or Segmental
PePUB63	WGD or Segmental
PePUB64	WGD or Segmental
PePUB65	Proximal
PePUB66	WGD or Segmental
PePUB67	WGD or Segmental
PePUB68	WGD or Segmental
PePUB69	WGD or Segmental
PePUB70	WGD or Segmental
PePUB71	WGD or Segmental
PePUB72	WGD or Segmental
PePUB73	WGD or Segmental
PePUB74	WGD or Segmental
PePUB75	Dispersed
PePUB76	WGD or Segmental
PePUB77	WGD or Segmental
PePUB78	WGD or Segmental
PePUB79	WGD or Segmental
PePUB80	WGD or Segmental
PePUB81	Dispersed
PePUB82	Dispersed
PePUB83	Dispersed
PePUB84	WGD or Segmental
PePUB85	WGD or Segmental
PePUB86	WGD or Segmental
PePUB87	WGD or Segmental
PePUB88	WGD or Segmental
PePUB89	WGD or Segmental
PePUB90	WGD or Segmental
PePUB91	Tandem
PePUB92	WGD or Segmental
PePUB93	Proximal
PePUB94	WGD or Segmental
PePUB95	Tandem
PePUB96	Dispersed
PePUB97	WGD or Segmental
PePUB98	Dispersed
PePUB99	WGD or Segmental
PePUB100	Proximal
PePUB101	Dispersed
PePUB102	WGD or Segmental
PePUB103	WGD or Segmental
PePUB104	Dispersed
PePUB105	WGD or Segmental
PePUB106	WGD or Segmental
PePUB107	WGD or Segmental
PePUB108	WGD or Segmental
PePUB109	WGD or Segmental
PePUB110	WGD or Segmental
PePUB111	WGD or Segmental
PePUB112	WGD or Segmental
PePUB113	WGD or Segmental
PePUB114	WGD or Segmental
PePUB115	WGD or Segmental
PePUB116	WGD or Segmental
PePUB117	Dispersed
PePUB118	Dispersed
PePUB119	Dispersed
PePUB120	Dispersed
PePUB121	WGD or Segmental

## Sheet: Table S4
Table S4 Collinearity relationship among all genes in Phyllostachys edulis with Arabidopsis thaliana and Oryza sativa, respectively
tair/rice Gene name	Phyllostachys edulis Gene name
LOC_Os01g47650.1	PH02Gene40959.t1
LOC_Os01g47780.1	PH02Gene22926.t1
LOC_Os01g48000.1	PH02Gene22928.t3
LOC_Os01g48060.2	PH02Gene22930.t1
LOC_Os01g48130.1	PH02Gene22932.t2
LOC_Os01g48140.1	PH02Gene22933.t1
LOC_Os01g48170.1	PH02Gene22935.t4
LOC_Os01g48190.1	PH02Gene22936.t1
LOC_Os01g48200.1	PH02Gene22938.t1
LOC_Os01g48210.1	PH02Gene22939.t1
LOC_Os01g48220.1	PH02Gene22940.t3
LOC_Os01g48270.1	PH02Gene22942.t1
LOC_Os01g48280.1	PH02Gene22943.t1
LOC_Os01g48300.1	PH02Gene22944.t1
LOC_Os01g48310.1	PH02Gene22945.t1
LOC_Os01g48320.1	PH02Gene22946.t1
LOC_Os01g48330.1	PH02Gene22947.t1
LOC_Os01g48360.2	PH02Gene22948.t1
LOC_Os01g48370.1	PH02Gene22949.t1
LOC_Os01g48380.2	PH02Gene22950.t1
LOC_Os01g48390.1	PH02Gene22952.t1
LOC_Os01g48410.1	PH02Gene22953.t1
LOC_Os01g48420.1	PH02Gene22954.t1
LOC_Os01g48440.1	PH02Gene38222.t1
LOC_Os01g48444.1	PH02Gene39645.t1
LOC_Os01g48446.1	PH02Gene39646.t1
LOC_Os01g48500.1	PH02Gene39647.t1
LOC_Os01g48530.1	PH02Gene39648.t1
LOC_Os01g48540.1	PH02Gene39649.t1
LOC_Os01g48550.1	PH02Gene39650.t1
LOC_Os01g48570.1	PH02Gene39652.t1
LOC_Os01g48580.1	PH02Gene39653.t1
LOC_Os01g48610.1	PH02Gene39654.t1
LOC_Os01g48700.1	PH02Gene39656.t1
LOC_Os01g48710.1	PH02Gene39658.t1
LOC_Os01g48720.1	PH02Gene39659.t1
LOC_Os01g48740.1	PH02Gene39660.t1
LOC_Os01g48760.1	PH02Gene36444.t1
LOC_Os01g48770.2	PH02Gene36445.t1
LOC_Os01g48790.1	PH02Gene36446.t3
LOC_Os01g48800.1	PH02Gene36447.t1
LOC_Os01g48810.1	PH02Gene36448.t1
LOC_Os01g48830.2	PH02Gene36449.t1
LOC_Os01g48850.1	PH02Gene36450.t1
LOC_Os01g48874.1	PH02Gene36451.t1
LOC_Os01g48910.2	PH02Gene36453.t1
LOC_Os01g48920.1	PH02Gene36454.t1
LOC_Os01g48930.1	PH02Gene36456.t1
LOC_Os01g48940.1	PH02Gene36457.t1
LOC_Os01g48960.1	PH02Gene36458.t1
LOC_Os01g48980.1	PH02Gene36461.t1
LOC_Os01g48990.1	PH02Gene36462.t1
LOC_Os01g49000.1	PH02Gene20042.t1
LOC_Os01g49024.1	PH02Gene20041.t1
LOC_Os01g49026.1	PH02Gene20039.t1
LOC_Os01g49120.1	PH02Gene20037.t1
LOC_Os01g49150.1	PH02Gene20036.t1
LOC_Os01g49160.1	PH02Gene20034.t1
LOC_Os01g49180.1	PH02Gene20033.t1
LOC_Os01g49190.1	PH02Gene20032.t1
LOC_Os01g49200.1	PH02Gene20031.t1
LOC_Os01g49210.1	PH02Gene20030.t1
LOC_Os01g49280.1	PH02Gene20027.t1
LOC_Os01g49310.1	PH02Gene20024.t1
LOC_Os01g49340.1	PH02Gene20023.t1
LOC_Os01g49350.1	PH02Gene20022.t1
LOC_Os01g49380.1	PH02Gene20021.t1
LOC_Os01g49390.1	PH02Gene20020.t1
LOC_Os01g49410.1	PH02Gene20017.t2
LOC_Os01g49430.1	PH02Gene20014.t1
LOC_Os01g49440.1	PH02Gene20013.t1
LOC_Os01g49470.1	PH02Gene20012.t1
LOC_Os01g49490.1	PH02Gene20011.t2
LOC_Os01g49510.1	PH02Gene20010.t3
LOC_Os01g49529.1	PH02Gene20009.t1
LOC_Os01g49560.1	PH02Gene20008.t2
LOC_Os01g49660.1	PH02Gene06593.t1
LOC_Os01g49670.1	PH02Gene06592.t1
LOC_Os01g49680.1	PH02Gene06591.t1
LOC_Os01g49690.1	PH02Gene06590.t1
LOC_Os01g49710.1	PH02Gene06588.t1
LOC_Os01g49740.1	PH02Gene06587.t1
LOC_Os01g49760.1	PH02Gene06586.t1
LOC_Os01g49770.1	PH02Gene06585.t1
LOC_Os01g49800.1	PH02Gene06584.t1
LOC_Os01g49820.1	PH02Gene06580.t1
LOC_Os01g49830.1	PH02Gene06579.t1
LOC_Os01g49930.1	PH02Gene06578.t2
LOC_Os01g49940.1	PH02Gene06577.t1
LOC_Os01g50010.1	PH02Gene06575.t1
LOC_Os01g50030.1	PH02Gene06574.t1
LOC_Os01g50040.1	PH02Gene06572.t1
LOC_Os01g50050.1	PH02Gene06571.t1
LOC_Os01g50060.1	PH02Gene06569.t1
LOC_Os01g50070.1	PH02Gene06568.t4
LOC_Os01g50100.1	PH02Gene06567.t1
LOC_Os01g50110.1	PH02Gene06565.t1
LOC_Os01g50120.1	PH02Gene06564.t1
LOC_Os01g50160.1	PH02Gene48283.t2
LOC_Os01g50170.1	PH02Gene48281.t1
LOC_Os01g50200.1	PH02Gene48280.t1
LOC_Os01g50310.1	PH02Gene06562.t1
LOC_Os01g50320.1	PH02Gene06560.t2
LOC_Os01g50330.1	PH02Gene06558.t1
LOC_Os01g50340.1	PH02Gene06557.t1
LOC_Os01g50370.1	PH02Gene06554.t1
LOC_Os01g50440.1	PH02Gene06550.t1
LOC_Os01g50450.1	PH02Gene06549.t1
LOC_Os01g50480.1	PH02Gene06547.t1
LOC_Os01g50616.1	PH02Gene06543.t1
LOC_Os01g50622.1	PH02Gene06542.t1
LOC_Os01g50700.1	PH02Gene06540.t1
LOC_Os01g50720.1	PH02Gene06536.t1
LOC_Os01g50750.1	PH02Gene06535.t1
LOC_Os01g50760.1	PH02Gene06534.t1
LOC_Os01g50770.1	PH02Gene06533.t1
LOC_Os01g50810.1	PH02Gene06532.t1
LOC_Os01g50820.1	PH02Gene06531.t1
LOC_Os01g50830.2	PH02Gene06530.t1
LOC_Os01g50840.1	PH02Gene06529.t1
LOC_Os01g50860.1	PH02Gene06527.t1
LOC_Os01g50870.1	PH02Gene06526.t1
LOC_Os01g50900.1	PH02Gene06525.t1
LOC_Os01g50910.1	PH02Gene06524.t1
LOC_Os01g50930.1	PH02Gene06522.t1
LOC_Os01g50940.1	PH02Gene06521.t1
LOC_Os01g51010.1	PH02Gene06520.t1
LOC_Os01g51020.1	PH02Gene06519.t1
LOC_Os01g51040.1	PH02Gene06517.t1
LOC_Os01g51050.1	PH02Gene06516.t1
LOC_Os01g51060.1	PH02Gene06515.t1
LOC_Os01g51120.1	PH02Gene06512.t1
LOC_Os01g51140.2	PH02Gene06511.t1
LOC_Os01g51154.1	PH02Gene16982.t1
LOC_Os01g51170.1	PH02Gene16981.t1
LOC_Os01g51190.1	PH02Gene16979.t1
LOC_Os01g51200.2	PH02Gene16978.t1
LOC_Os01g51210.1	PH02Gene16977.t5
LOC_Os01g51230.1	PH02Gene16976.t2
LOC_Os01g51250.1	PH02Gene16975.t1
LOC_Os01g51260.1	PH02Gene16974.t1
LOC_Os01g51280.1	PH02Gene16973.t1
LOC_Os01g51290.1	PH02Gene16972.t1
LOC_Os01g51300.1	PH02Gene16971.t1
LOC_Os01g51310.1	PH02Gene16970.t1
LOC_Os01g51320.1	PH02Gene16969.t1
LOC_Os01g51360.1	PH02Gene16968.t1
LOC_Os01g51380.1	PH02Gene16967.t1
LOC_Os01g51390.1	PH02Gene16966.t1
LOC_Os01g51410.1	PH02Gene16965.t1
LOC_Os01g51430.1	PH02Gene16964.t1
LOC_Os01g51460.1	PH02Gene33352.t1
LOC_Os01g51530.1	PH02Gene33353.t1
LOC_Os01g51540.1	PH02Gene33354.t1
LOC_Os01g51620.1	PH02Gene33359.t2
LOC_Os01g51630.1	PH02Gene33360.t1
LOC_Os01g51640.1	PH02Gene33361.t1
LOC_Os01g51690.1	PH02Gene33364.t1
LOC_Os01g51700.1	PH02Gene33365.t1
LOC_Os01g51840.1	PH02Gene33368.t2
LOC_Os01g51850.1	PH02Gene33369.t1
LOC_Os01g51860.1	PH02Gene33370.t1
LOC_Os01g51870.1	PH02Gene46692.t1
LOC_Os01g51890.1	PH02Gene27425.t1
LOC_Os01g51920.1	PH02Gene27426.t1
LOC_Os01g51980.1	PH02Gene27427.t1
LOC_Os01g52030.1	PH02Gene27428.t1
LOC_Os01g52070.1	PH02Gene27430.t1
LOC_Os01g52090.2	PH02Gene27433.t1
LOC_Os01g52100.1	PH02Gene27434.t1
LOC_Os01g52110.1	PH02Gene27435.t1
LOC_Os01g52130.1	PH02Gene27436.t1
LOC_Os01g52160.1	PH02Gene27437.t1
LOC_Os01g52180.1	PH02Gene27438.t1
LOC_Os01g52190.1	PH02Gene27439.t1
LOC_Os01g52230.1	PH02Gene27440.t1
LOC_Os01g52240.1	PH02Gene27441.t1
LOC_Os01g52260.1	PH02Gene27443.t1
LOC_Os01g52270.1	PH02Gene27446.t1
LOC_Os01g52390.1	PH02Gene45371.t1
LOC_Os01g52400.1	PH02Gene45372.t1
LOC_Os01g52410.1	PH02Gene45373.t1
LOC_Os01g52480.1	PH02Gene45375.t1
LOC_Os01g52490.1	PH02Gene45376.t1
LOC_Os01g52500.2	PH02Gene18767.t1
LOC_Os01g52514.1	PH02Gene18768.t1
LOC_Os01g52530.1	PH02Gene18769.t1
LOC_Os01g52550.1	PH02Gene18770.t1
LOC_Os01g52560.1	PH02Gene18771.t1
LOC_Os01g52570.1	PH02Gene18773.t1
LOC_Os01g52630.1	PH02Gene18775.t1
LOC_Os01g52640.3	PH02Gene18777.t1
LOC_Os01g52650.1	PH02Gene18780.t1
LOC_Os01g52680.1	PH02Gene18783.t1
LOC_Os01g52690.1	PH02Gene18784.t1
LOC_Os01g52710.1	PH02Gene18785.t1
LOC_Os01g52720.1	PH02Gene18786.t1
LOC_Os01g52730.1	PH02Gene18787.t1
LOC_Os01g52750.1	PH02Gene18788.t1
LOC_Os01g52760.1	PH02Gene18789.t1
LOC_Os01g52770.1	PH02Gene18790.t1
LOC_Os01g52780.1	PH02Gene18791.t1
LOC_Os01g52864.1	PH02Gene18792.t3
LOC_Os01g52880.1	PH02Gene18793.t1
LOC_Os01g52920.1	PH02Gene18795.t1
LOC_Os01g52970.1	PH02Gene18796.t1
LOC_Os01g53000.1	PH02Gene18798.t1
LOC_Os01g53020.1	PH02Gene18800.t1
LOC_Os01g53040.1	PH02Gene18801.t1
LOC_Os01g53060.1	PH02Gene18802.t1
LOC_Os01g53070.1	PH02Gene18803.t1
LOC_Os01g53090.1	PH02Gene18804.t1
LOC_Os01g53140.1	PH02Gene18806.t1
LOC_Os01g53150.1	PH02Gene18807.t1
LOC_Os01g53160.1	PH02Gene18808.t1
LOC_Os01g53200.1	PH02Gene18809.t1
LOC_Os01g53220.1	PH02Gene18810.t1
LOC_Os01g53240.1	PH02Gene48609.t1
LOC_Os01g53250.1	PH02Gene48608.t1
LOC_Os01g53260.1	PH02Gene45458.t1
LOC_Os01g53280.1	PH02Gene45457.t1
LOC_Os01g53294.1	PH02Gene45456.t1
LOC_Os01g53330.1	PH02Gene45455.t1
LOC_Os01g53380.1	PH02Gene45454.t1
LOC_Os01g53470.1	PH02Gene34610.t1
LOC_Os01g53500.1	PH02Gene34608.t1
LOC_Os01g53520.1	PH02Gene34606.t1
LOC_Os01g53560.1	PH02Gene34605.t1
LOC_Os01g53570.1	PH02Gene34604.t1
LOC_Os01g53580.1	PH02Gene34603.t1
LOC_Os01g53600.1	PH02Gene34602.t2
LOC_Os01g53610.1	PH02Gene34601.t1
LOC_Os01g53620.1	PH02Gene34600.t1
LOC_Os01g53630.1	PH02Gene34599.t4
LOC_Os01g53640.1	PH02Gene34598.t3
LOC_Os01g53650.1	PH02Gene34597.t1
LOC_Os01g53660.1	PH02Gene34596.t1
LOC_Os01g53670.1	PH02Gene36928.t2
LOC_Os01g53680.1	PH02Gene36929.t1
LOC_Os01g53710.1	PH02Gene36930.t1
LOC_Os01g53720.1	PH02Gene36931.t1
LOC_Os01g53730.1	PH02Gene36932.t1
LOC_Os01g53750.1	PH02Gene36933.t1
LOC_Os01g53790.1	PH02Gene36935.t1
LOC_Os01g53810.1	PH02Gene36936.t1
LOC_Os01g53880.1	PH02Gene36939.t3
LOC_Os01g53890.1	PH02Gene36940.t1
LOC_Os01g53900.1	PH02Gene36941.t1
LOC_Os01g53910.1	PH02Gene36942.t1
LOC_Os01g53930.1	PH02Gene15132.t1
LOC_Os01g53980.1	PH02Gene15131.t1
LOC_Os01g53990.1	PH02Gene15130.t2
LOC_Os01g54050.1	PH02Gene15129.t4
LOC_Os01g54080.1	PH02Gene15128.t1
LOC_Os01g54090.1	PH02Gene15126.t1
LOC_Os01g54100.2	PH02Gene15125.t1
LOC_Os01g54119.1	PH02Gene15124.t1
LOC_Os01g54140.1	PH02Gene15123.t1
LOC_Os01g54210.1	PH02Gene15122.t1
LOC_Os01g54240.1	PH02Gene15120.t1
LOC_Os01g54270.1	PH02Gene15116.t2
LOC_Os01g54300.1	PH02Gene15114.t1
LOC_Os01g54340.1	PH02Gene15111.t1
LOC_Os01g54350.1	PH02Gene15110.t1
LOC_Os01g54370.1	PH02Gene15109.t1
LOC_Os01g54380.1	PH02Gene15108.t1
LOC_Os01g54390.1	PH02Gene15107.t1
LOC_Os01g54400.1	PH02Gene15105.t1
LOC_Os01g54420.1	PH02Gene15104.t1
LOC_Os01g54440.1	PH02Gene15102.t1
LOC_Os01g54450.1	PH02Gene15101.t1
LOC_Os01g54480.1	PH02Gene15098.t2
LOC_Os01g54510.1	PH02Gene15096.t1
LOC_Os01g54515.1	PH02Gene15093.t1
LOC_Os01g54530.1	PH02Gene15092.t1
LOC_Os01g54540.1	PH02Gene15091.t1
LOC_Os01g54550.1	PH02Gene15090.t1
LOC_Os01g54560.1	PH02Gene15089.t1
LOC_Os01g54570.1	PH02Gene15088.t1
LOC_Os01g54580.1	PH02Gene15086.t1
LOC_Os01g54600.1	PH02Gene15084.t1
LOC_Os01g54620.1	PH02Gene15083.t1
LOC_Os01g54630.1	PH02Gene15079.t1
LOC_Os01g54670.1	PH02Gene15078.t1
LOC_Os01g54700.1	PH02Gene15076.t2
LOC_Os01g54784.1	PH02Gene15072.t1
LOC_Os01g54810.1	PH02Gene15071.t1
LOC_Os01g54860.1	PH02Gene15069.t1
LOC_Os01g54870.1	PH02Gene15068.t1
LOC_Os01g54880.1	PH02Gene15067.t1
LOC_Os01g54890.1	PH02Gene15066.t1
LOC_Os01g54900.1	PH02Gene17552.t1
LOC_Os01g54910.1	PH02Gene17553.t1
LOC_Os01g54920.1	PH02Gene17554.t2
LOC_Os01g54930.1	PH02Gene17555.t1
LOC_Os01g54969.1	PH02Gene17556.t1
LOC_Os01g54990.1	PH02Gene17557.t1
LOC_Os01g55000.1	PH02Gene17558.t1
LOC_Os01g55020.4	PH02Gene17560.t1
LOC_Os01g55030.1	PH02Gene17561.t1
LOC_Os01g55050.1	PH02Gene17562.t1
LOC_Os01g55070.1	PH02Gene17563.t1
LOC_Os01g55094.2	PH02Gene17564.t1
LOC_Os01g55100.1	PH02Gene17565.t1
LOC_Os01g55110.1	PH02Gene17566.t1
LOC_Os01g55120.1	PH02Gene17567.t1
LOC_Os01g55150.1	PH02Gene17568.t1
LOC_Os01g55160.1	PH02Gene17569.t1
LOC_Os01g55170.1	PH02Gene17570.t1
LOC_Os01g55190.1	PH02Gene17572.t1
LOC_Os01g55200.1	PH02Gene17574.t1
LOC_Os01g55240.1	PH02Gene17576.t1
LOC_Os01g55260.1	PH02Gene17577.t1
LOC_Os01g55280.1	PH02Gene17578.t1
LOC_Os01g55290.2	PH02Gene17579.t1
LOC_Os01g55300.1	PH02Gene17580.t1
LOC_Os01g55320.1	PH02Gene17581.t1
LOC_Os01g55340.1	PH02Gene17583.t1
LOC_Os01g55350.1	PH02Gene17585.t1
LOC_Os01g55360.1	PH02Gene17586.t1
LOC_Os01g55370.1	PH02Gene17587.t1
LOC_Os01g55410.1	PH02Gene17589.t1
LOC_Os01g55560.1	PH02Gene42652.t1
LOC_Os01g55650.1	PH02Gene24655.t1
LOC_Os01g55700.1	PH02Gene24654.t1
LOC_Os01g55720.1	PH02Gene24653.t1
LOC_Os01g55730.1	PH02Gene24650.t1
LOC_Os01g55740.1	PH02Gene24649.t1
LOC_Os01g55750.1	PH02Gene24648.t1
LOC_Os01g55770.1	PH02Gene24647.t1
LOC_Os01g55780.1	PH02Gene24646.t1
LOC_Os01g55799.1	PH02Gene24645.t1
LOC_Os01g55795.1	PH02Gene24644.t1
LOC_Os01g55820.1	PH02Gene24643.t1
LOC_Os01g55830.1	PH02Gene24642.t1
LOC_Os01g55860.1	PH02Gene24641.t1
LOC_Os01g55870.1	PH02Gene24639.t1
LOC_Os01g55890.1	PH02Gene24637.t1
LOC_Os01g55940.1	PH02Gene24636.t1
LOC_Os01g55974.2	PH02Gene24635.t1
LOC_Os01g56000.1	PH02Gene24634.t1
LOC_Os01g56020.1	PH02Gene24633.t1
LOC_Os01g56030.1	PH02Gene24632.t1
LOC_Os01g56050.1	PH02Gene24630.t1
LOC_Os01g56080.1	PH02Gene24629.t1
LOC_Os01g56100.1	PH02Gene24628.t1
LOC_Os01g56130.1	PH02Gene24627.t1
LOC_Os01g56140.1	PH02Gene12862.t1
LOC_Os01g56150.1	PH02Gene12861.t2
LOC_Os01g56180.1	PH02Gene12860.t1
LOC_Os01g56190.1	PH02Gene12859.t1
LOC_Os01g56200.1	PH02Gene12858.t1
LOC_Os01g56230.1	PH02Gene12856.t1
LOC_Os01g56235.1	PH02Gene12855.t1
LOC_Os01g56240.1	PH02Gene12854.t1
LOC_Os01g56300.1	PH02Gene12853.t1
LOC_Os01g56310.1	PH02Gene12852.t1
LOC_Os01g56320.1	PH02Gene12851.t1
LOC_Os01g56350.1	PH02Gene12845.t1
LOC_Os01g56380.1	PH02Gene12843.t1
LOC_Os01g56390.1	PH02Gene12841.t1
LOC_Os01g56400.1	PH02Gene12839.t1
LOC_Os01g56450.1	PH02Gene12838.t1
LOC_Os01g56460.1	PH02Gene12837.t1
LOC_Os01g56470.1	PH02Gene12836.t1
LOC_Os01g56490.1	PH02Gene12835.t1
LOC_Os01g56510.1	PH02Gene12833.t1
LOC_Os01g56520.1	PH02Gene12831.t1
LOC_Os01g56530.1	PH02Gene12829.t1
LOC_Os01g56550.1	PH02Gene12828.t1
LOC_Os01g56560.1	PH02Gene12827.t1
LOC_Os01g56570.1	PH02Gene12826.t1
LOC_Os01g56580.1	PH02Gene12825.t1
LOC_Os01g56590.1	PH02Gene12824.t1
LOC_Os01g56600.1	PH02Gene12822.t1
LOC_Os01g56630.2	PH02Gene43337.t2
LOC_Os01g56660.1	PH02Gene43336.t1
LOC_Os01g56670.1	PH02Gene43334.t1
LOC_Os01g56680.1	PH02Gene43333.t1
LOC_Os01g56690.1	PH02Gene43332.t1
LOC_Os01g56764.1	PH02Gene43329.t1
LOC_Os01g56780.3	PH02Gene17869.t2
LOC_Os01g56790.1	PH02Gene17868.t1
LOC_Os01g56800.2	PH02Gene17867.t2
LOC_Os01g56810.1	PH02Gene17863.t1
LOC_Os01g56820.1	PH02Gene17862.t4
LOC_Os01g56860.1	PH02Gene17861.t1
LOC_Os01g56880.1	PH02Gene17860.t1
LOC_Os01g56890.1	PH02Gene17858.t2
LOC_Os01g56910.1	PH02Gene17857.t1
LOC_Os01g56930.1	PH02Gene17856.t1
LOC_Os01g56940.1	PH02Gene17855.t2
LOC_Os01g56960.1	PH02Gene17854.t1
LOC_Os01g56990.1	PH02Gene17853.t2
LOC_Os01g57004.1	PH02Gene17852.t1
LOC_Os01g57020.1	PH02Gene17850.t1
LOC_Os01g57050.1	PH02Gene17849.t1
LOC_Os01g57066.1	PH02Gene17848.t1
LOC_Os01g57073.1	PH02Gene17847.t1
LOC_Os01g57100.1	PH02Gene17844.t1
LOC_Os01g57110.1	PH02Gene17843.t2
LOC_Os01g57150.1	PH02Gene17842.t1
LOC_Os01g57210.1	PH02Gene17841.t1
LOC_Os01g57220.2	PH02Gene17840.t1
LOC_Os01g57230.1	PH02Gene17839.t1
LOC_Os01g57240.1	PH02Gene17837.t1
LOC_Os01g57260.1	PH02Gene17836.t1
LOC_Os01g57360.1	PH02Gene17835.t1
LOC_Os01g57390.1	PH02Gene17833.t1
LOC_Os01g57410.1	PH02Gene17832.t1
LOC_Os01g57420.1	PH02Gene17831.t2
LOC_Os01g57450.1	PH02Gene17830.t1
LOC_Os01g57460.1	PH02Gene17829.t1
LOC_Os01g57470.1	PH02Gene17828.t1
LOC_Os01g57480.1	PH02Gene17827.t1
LOC_Os01g57510.1	PH02Gene17826.t1
LOC_Os01g57570.1	PH02Gene46745.t1
LOC_Os01g57580.1	PH02Gene46746.t1
LOC_Os01g57610.1	PH02Gene03928.t1
LOC_Os01g57620.1	PH02Gene03927.t1
LOC_Os01g57630.1	PH02Gene03926.t1
LOC_Os01g57650.1	PH02Gene03925.t1
LOC_Os01g57690.1	PH02Gene03924.t1
LOC_Os01g57720.1	PH02Gene03922.t1
LOC_Os01g57730.1	PH02Gene03921.t1
LOC_Os01g57740.1	PH02Gene03920.t1
LOC_Os01g57770.1	PH02Gene03919.t1
LOC_Os01g57854.1	PH02Gene03917.t1
LOC_Os01g57870.1	PH02Gene03916.t1
LOC_Os01g57880.1	PH02Gene03915.t1
LOC_Os01g57890.1	PH02Gene03913.t1
LOC_Os01g57900.1	PH02Gene03912.t1
LOC_Os01g57910.1	PH02Gene03911.t1
LOC_Os01g58070.1	PH02Gene03906.t1
LOC_Os01g58114.1	PH02Gene03904.t2
LOC_Os01g58130.1	PH02Gene03903.t1
LOC_Os01g58194.1	PH02Gene03900.t1
LOC_Os01g58220.1	PH02Gene03899.t1
LOC_Os01g58240.1	PH02Gene03897.t1
LOC_Os01g58290.2	PH02Gene03896.t1
LOC_Os01g58380.1	PH02Gene03895.t1
LOC_Os01g58400.1	PH02Gene03892.t1
LOC_Os01g58420.1	PH02Gene03889.t1
LOC_Os01g58470.1	PH02Gene03887.t1
LOC_Os01g58490.1	PH02Gene03885.t1
LOC_Os01g58500.1	PH02Gene03884.t1
LOC_Os01g58510.1	PH02Gene03883.t1
LOC_Os01g58520.1	PH02Gene03882.t1
LOC_Os01g58530.1	PH02Gene03881.t1
LOC_Os01g58550.1	PH02Gene03880.t1
LOC_Os01g58580.1	PH02Gene03878.t1
LOC_Os01g58610.1	PH02Gene03877.t1
LOC_Os01g58620.1	PH02Gene03875.t1
LOC_Os01g58640.1	PH02Gene03873.t1
LOC_Os01g58650.1	PH02Gene03872.t1
LOC_Os01g58680.1	PH02Gene03871.t1
LOC_Os01g58700.1	PH02Gene03867.t1
LOC_Os01g58730.1	PH02Gene03866.t1
LOC_Os01g58740.1	PH02Gene03865.t1
LOC_Os01g58750.1	PH02Gene03864.t1
LOC_Os01g58760.1	PH02Gene49751.t1
LOC_Os01g58800.1	PH02Gene03859.t1
LOC_Os01g58850.1	PH02Gene03858.t1
LOC_Os01g58860.1	PH02Gene03857.t1
LOC_Os01g58890.1	PH02Gene03850.t1
LOC_Os01g58910.1	PH02Gene47001.t1
LOC_Os01g58950.1	PH02Gene47002.t1
LOC_Os01g59060.1	PH02Gene47003.t1
LOC_Os01g59080.1	PH02Gene47004.t1
LOC_Os01g59090.1	PH02Gene47006.t1
LOC_Os01g59100.1	PH02Gene37930.t1
LOC_Os01g59120.1	PH02Gene37929.t1
LOC_Os01g59130.1	PH02Gene37928.t1
LOC_Os01g59150.1	PH02Gene37926.t1
LOC_Os01g59160.1	PH02Gene37925.t1
LOC_Os01g59180.1	PH02Gene37924.t1
LOC_Os01g59200.1	PH02Gene37923.t1
LOC_Os01g59320.1	PH02Gene37922.t1
LOC_Os01g59340.1	PH02Gene37920.t1
LOC_Os01g59350.1	PH02Gene37919.t1
LOC_Os01g59360.1	PH02Gene37918.t1
LOC_Os01g59410.1	PH02Gene37917.t1
LOC_Os01g59440.1	PH02Gene37916.t1
LOC_Os01g59490.1	PH02Gene37915.t1
LOC_Os01g59500.1	PH02Gene37914.t2
LOC_Os01g59510.1	PH02Gene37913.t1
LOC_Os01g59520.1	PH02Gene37912.t1
LOC_Os01g59530.1	PH02Gene37911.t1
LOC_Os01g59550.1	PH02Gene03756.t1
LOC_Os01g59600.1	PH02Gene03755.t1
LOC_Os01g59660.2	PH02Gene03750.t1
LOC_Os01g59690.1	PH02Gene03747.t1
LOC_Os01g59740.1	PH02Gene03745.t1
LOC_Os01g59750.1	PH02Gene03744.t2
LOC_Os01g59760.1	PH02Gene03743.t1
LOC_Os01g59790.1	PH02Gene03742.t1
LOC_Os01g59800.1	PH02Gene03741.t1
LOC_Os01g59850.1	PH02Gene03740.t1
LOC_Os01g59860.1	PH02Gene03739.t1
LOC_Os01g59870.1	PH02Gene03738.t1
LOC_Os01g59880.1	PH02Gene03737.t1
LOC_Os01g59890.1	PH02Gene03736.t1
LOC_Os01g59900.1	PH02Gene03735.t1
LOC_Os01g59910.1	PH02Gene03734.t1
LOC_Os01g59920.1	PH02Gene03733.t1
LOC_Os01g59930.1	PH02Gene03732.t1
LOC_Os01g59950.1	PH02Gene03731.t1
LOC_Os01g59970.1	PH02Gene03730.t1
LOC_Os01g59980.1	PH02Gene03729.t1
LOC_Os01g59990.1	PH02Gene03728.t1
LOC_Os01g60000.1	PH02Gene03727.t1
LOC_Os01g60010.1	PH02Gene03726.t1
LOC_Os01g60020.1	PH02Gene03725.t1
LOC_Os01g60040.1	PH02Gene03724.t1
LOC_Os01g60060.1	PH02Gene03722.t1
LOC_Os01g60080.1	PH02Gene03721.t1
LOC_Os01g60110.1	PH02Gene03720.t1
LOC_Os01g60140.1	PH02Gene03716.t1
LOC_Os01g60170.1	PH02Gene03714.t1
LOC_Os01g60200.1	PH02Gene03712.t1
LOC_Os01g60230.4	PH02Gene03710.t1
LOC_Os01g60250.1	PH02Gene03709.t1
LOC_Os01g60260.1	PH02Gene03708.t1
LOC_Os01g60270.1	PH02Gene03707.t1
LOC_Os01g60280.1	PH02Gene03706.t1
LOC_Os01g60309.1	PH02Gene03705.t1
LOC_Os01g60330.1	PH02Gene03703.t1
LOC_Os01g60360.1	PH02Gene03701.t1
LOC_Os01g60420.1	PH02Gene03700.t1
LOC_Os01g60440.1	PH02Gene03699.t1
LOC_Os01g60450.1	PH02Gene03697.t1
LOC_Os01g60490.1	PH02Gene03694.t1
LOC_Os01g60520.1	PH02Gene03693.t1
LOC_Os01g60540.1	PH02Gene03692.t1
LOC_Os01g60650.1	PH02Gene03690.t1
LOC_Os01g60660.1	PH02Gene03689.t1
LOC_Os01g60670.1	PH02Gene03688.t1
LOC_Os01g60700.1	PH02Gene03687.t3
LOC_Os01g60730.1	PH02Gene03685.t1
LOC_Os01g60740.1	PH02Gene03684.t1
LOC_Os01g60770.1	PH02Gene03683.t1
LOC_Os01g60780.1	PH02Gene03682.t1
LOC_Os01g60790.1	PH02Gene03681.t1
LOC_Os01g60800.1	PH02Gene03680.t1
LOC_Os01g60810.1	PH02Gene03679.t1
LOC_Os01g60830.1	PH02Gene03678.t1
LOC_Os01g60850.1	PH02Gene03677.t1
LOC_Os01g60860.1	PH02Gene03675.t1
LOC_Os01g60900.1	PH02Gene03673.t2
LOC_Os01g60910.1	PH02Gene03672.t1
LOC_Os01g60930.1	PH02Gene03670.t1
LOC_Os01g60940.1	PH02Gene03668.t1
LOC_Os01g60960.1	PH02Gene03666.t1
LOC_Os01g61010.1	PH02Gene03665.t1
LOC_Os01g61020.1	PH02Gene48736.t1
LOC_Os01g61030.1	PH02Gene48735.t1
LOC_Os01g61044.1	PH02Gene48734.t1
LOC_Os01g61060.1	PH02Gene03663.t1
LOC_Os01g61070.1	PH02Gene03661.t1
LOC_Os01g61080.1	PH02Gene03660.t1
LOC_Os01g61120.1	PH02Gene03658.t1
LOC_Os01g61150.1	PH02Gene03657.t1
LOC_Os01g61160.1	PH02Gene03656.t1
LOC_Os01g61170.1	PH02Gene03655.t1
LOC_Os01g61180.1	PH02Gene03654.t1
LOC_Os01g61210.1	PH02Gene03652.t1
LOC_Os01g61230.1	PH02Gene03651.t1
LOC_Os01g61240.1	PH02Gene03650.t1
LOC_Os01g61250.1	PH02Gene03649.t1
LOC_Os01g61310.1	PH02Gene03648.t1
LOC_Os01g61320.1	PH02Gene03647.t1
LOC_Os01g61330.1	PH02Gene03646.t1
LOC_Os01g61350.1	PH02Gene03645.t1
LOC_Os01g61370.1	PH02Gene03644.t1
LOC_Os01g61390.1	PH02Gene03643.t1
LOC_Os01g61400.1	PH02Gene03642.t1
LOC_Os01g61410.1	PH02Gene03641.t1
LOC_Os01g61420.1	PH02Gene03640.t1
LOC_Os01g61430.1	PH02Gene42566.t1
LOC_Os01g61440.1	PH02Gene42567.t1
LOC_Os01g61460.1	PH02Gene42568.t1
LOC_Os01g61480.1	PH02Gene23845.t1
LOC_Os01g61500.1	PH02Gene23843.t1
LOC_Os01g61510.1	PH02Gene23841.t1
LOC_Os01g61570.1	PH02Gene23839.t1
LOC_Os01g61580.3	PH02Gene23838.t1
LOC_Os01g61590.1	PH02Gene23837.t1
LOC_Os01g61610.1	PH02Gene23836.t1
LOC_Os01g61620.1	PH02Gene23834.t1
LOC_Os01g61640.1	PH02Gene23833.t1
LOC_Os01g61670.1	PH02Gene23832.t1
LOC_Os01g61690.1	PH02Gene23831.t1
LOC_Os01g61710.2	PH02Gene23830.t1
LOC_Os01g61720.1	PH02Gene23829.t1
LOC_Os01g61760.1	PH02Gene23828.t2
LOC_Os01g61780.1	PH02Gene23827.t1
LOC_Os01g61810.2	PH02Gene23826.t2
LOC_Os01g61814.1	PH02Gene23825.t1
LOC_Os01g61830.1	PH02Gene23823.t1
LOC_Os01g61860.1	PH02Gene23822.t1
LOC_Os01g61880.1	PH02Gene23821.t1
LOC_Os01g61900.1	PH02Gene23819.t1
LOC_Os01g61910.1	PH02Gene23817.t3
LOC_Os01g61920.1	PH02Gene23815.t1
LOC_Os01g61930.1	PH02Gene23814.t1
LOC_Os01g61940.1	PH02Gene23813.t1
LOC_Os01g61960.1	PH02Gene23812.t1
LOC_Os01g61990.1	PH02Gene23811.t1
LOC_Os01g62000.1	PH02Gene23810.t1
LOC_Os01g62010.1	PH02Gene23808.t1
LOC_Os01g62060.1	PH02Gene49266.t1
LOC_Os01g62130.1	PH02Gene32595.t1
LOC_Os01g62160.1	PH02Gene32597.t2
LOC_Os01g62200.1	PH02Gene32599.t1
LOC_Os01g62210.1	PH02Gene32600.t1
LOC_Os01g62244.1	PH02Gene32602.t1
LOC_Os01g62260.1	PH02Gene32603.t1
LOC_Os01g62290.1	PH02Gene32604.t1
LOC_Os01g62300.1	PH02Gene32605.t1
LOC_Os01g62310.1	PH02Gene32607.t1
LOC_Os01g62350.1	PH02Gene32609.t1
LOC_Os01g62360.1	PH02Gene32611.t1
LOC_Os01g62370.1	PH02Gene32612.t1
LOC_Os01g62380.2	PH02Gene32613.t1
LOC_Os01g62390.1	PH02Gene32614.t1
LOC_Os01g62400.1	PH02Gene32616.t1
LOC_Os01g62410.1	PH02Gene32617.t1
LOC_Os01g62430.2	PH02Gene32618.t1
LOC_Os01g62460.2	PH02Gene32619.t1
LOC_Os01g62480.1	PH02Gene32621.t1
LOC_Os01g62500.1	PH02Gene45332.t1
LOC_Os01g62510.1	PH02Gene45331.t1
LOC_Os01g62605.1	PH02Gene11437.t1
LOC_Os01g62610.1	PH02Gene11436.t1
LOC_Os01g62620.1	PH02Gene11435.t1
LOC_Os01g62630.1	PH02Gene11434.t1
LOC_Os01g62640.1	PH02Gene11432.t1
LOC_Os01g62650.1	PH02Gene11431.t1
LOC_Os01g62660.1	PH02Gene11430.t1
LOC_Os01g62670.1	PH02Gene11429.t1
LOC_Os01g62780.1	PH02Gene11428.t1
LOC_Os01g62800.1	PH02Gene11425.t2
LOC_Os01g62810.1	PH02Gene11424.t2
LOC_Os01g62820.1	PH02Gene11423.t2
LOC_Os01g62830.1	PH02Gene11422.t1
LOC_Os01g62840.1	PH02Gene11421.t1
LOC_Os01g62850.1	PH02Gene11420.t1
LOC_Os01g62860.1	PH02Gene11418.t1
LOC_Os01g62870.2	PH02Gene11417.t1
LOC_Os01g62890.1	PH02Gene11416.t1
LOC_Os01g62900.1	PH02Gene11414.t1
LOC_Os01g62910.1	PH02Gene11413.t1
LOC_Os01g62920.1	PH02Gene11412.t1
LOC_Os01g62950.1	PH02Gene11411.t1
LOC_Os01g62970.2	PH02Gene11410.t1
LOC_Os01g62980.1	PH02Gene11409.t1
LOC_Os01g62990.1	PH02Gene11408.t1
LOC_Os01g63050.1	PH02Gene11406.t2
LOC_Os01g63060.1	PH02Gene11405.t1
LOC_Os01g63150.1	PH02Gene11404.t1
LOC_Os01g63160.1	PH02Gene11403.t1
LOC_Os01g63190.1	PH02Gene11402.t1
LOC_Os01g63210.1	PH02Gene11401.t1
LOC_Os01g63230.1	PH02Gene11400.t1
LOC_Os01g63240.1	PH02Gene11399.t1
LOC_Os01g63250.1	PH02Gene11398.t1
LOC_Os01g63260.1	PH02Gene11396.t1
LOC_Os01g63270.1	PH02Gene11395.t1
LOC_Os01g63290.1	PH02Gene11393.t1
LOC_Os01g63310.1	PH02Gene11391.t1
LOC_Os01g63354.1	PH02Gene11390.t3
LOC_Os01g63400.1	PH02Gene11389.t1
LOC_Os01g63420.1	PH02Gene11388.t1
LOC_Os01g63460.1	PH02Gene11386.t1
LOC_Os01g63480.1	PH02Gene11385.t1
LOC_Os01g63500.1	PH02Gene11384.t1
LOC_Os01g63510.1	PH02Gene11383.t1
LOC_Os01g63580.1	PH02Gene11382.t1
LOC_Os01g63620.1	PH02Gene37519.t1
LOC_Os01g63680.1	PH02Gene37520.t1
LOC_Os01g63690.1	PH02Gene37521.t1
LOC_Os01g63710.3	PH02Gene37522.t1
LOC_Os01g63770.1	PH02Gene37523.t1
LOC_Os01g63780.1	PH02Gene37524.t1
LOC_Os01g63790.1	PH02Gene37525.t1
LOC_Os01g63800.1	PH02Gene37526.t1
LOC_Os01g63810.1	PH02Gene37527.t1
LOC_Os01g63820.1	PH02Gene37528.t1
LOC_Os01g63830.1	PH02Gene37529.t1
LOC_Os01g63840.1	PH02Gene37530.t1
LOC_Os01g63854.1	PH02Gene37531.t1
LOC_Os01g63870.1	PH02Gene37535.t1
LOC_Os01g63880.1	PH02Gene37536.t1
LOC_Os01g63890.1	PH02Gene37537.t1
LOC_Os01g63900.1	PH02Gene37538.t1
LOC_Os01g63910.1	PH02Gene37539.t1
LOC_Os01g63930.1	PH02Gene42493.t1
LOC_Os01g63940.1	PH02Gene33155.t1
LOC_Os01g63950.1	PH02Gene33154.t1
LOC_Os01g63980.1	PH02Gene33153.t1
LOC_Os01g63990.1	PH02Gene33152.t2
LOC_Os01g64000.1	PH02Gene33151.t1
LOC_Os01g64010.1	PH02Gene33149.t1
LOC_Os01g64020.1	PH02Gene33148.t1
LOC_Os01g64030.1	PH02Gene33147.t1
LOC_Os01g64100.1	PH02Gene33146.t1
LOC_Os01g64110.1	PH02Gene33145.t1
LOC_Os01g64120.1	PH02Gene33144.t1
LOC_Os01g64170.1	PH02Gene33143.t1
LOC_Os01g64250.1	PH02Gene33142.t1
LOC_Os01g64270.1	PH02Gene33141.t1
LOC_Os01g64280.1	PH02Gene33140.t1
LOC_Os01g64300.1	PH02Gene33139.t1
LOC_Os01g64310.1	PH02Gene33138.t1
LOC_Os01g64360.1	PH02Gene33136.t1
LOC_Os01g64370.1	PH02Gene33135.t1
LOC_Os01g64410.1	PH02Gene38179.t1
LOC_Os01g64430.1	PH02Gene38180.t1
LOC_Os01g64450.1	PH02Gene38181.t1
LOC_Os01g64490.1	PH02Gene38184.t1
LOC_Os01g64520.1	PH02Gene38186.t1
LOC_Os01g64540.1	PH02Gene38188.t1
LOC_Os01g64560.1	PH02Gene38189.t1
LOC_Os01g64590.1	PH02Gene38190.t1
LOC_Os01g64630.1	PH02Gene38192.t1
LOC_Os01g64650.1	PH02Gene38193.t1
LOC_Os01g64660.1	PH02Gene38194.t1
LOC_Os01g64680.1	PH02Gene38195.t1
LOC_Os01g64690.1	PH02Gene38196.t1
LOC_Os01g64700.2	PH02Gene38198.t1
LOC_Os01g64720.1	PH02Gene38199.t2
LOC_Os01g64730.1	PH02Gene38200.t1
LOC_Os01g64750.1	PH02Gene22329.t1
LOC_Os01g64760.1	PH02Gene22324.t1
LOC_Os01g64770.1	PH02Gene22323.t1
LOC_Os01g64780.1	PH02Gene22322.t3
LOC_Os01g64790.1	PH02Gene22321.t1
LOC_Os01g64810.1	PH02Gene22320.t1
LOC_Os01g64820.1	PH02Gene22319.t1
LOC_Os01g64850.1	PH02Gene22318.t1
LOC_Os01g64870.1	PH02Gene22317.t1
LOC_Os01g64890.1	PH02Gene22316.t1
LOC_Os01g64900.1	PH02Gene22315.t1
LOC_Os01g64920.1	PH02Gene22314.t1
LOC_Os01g64960.1	PH02Gene22313.t1
LOC_Os01g64970.1	PH02Gene22312.t1
LOC_Os01g64980.1	PH02Gene22311.t8
LOC_Os01g64990.1	PH02Gene22306.t1
LOC_Os01g65000.1	PH02Gene22305.t1
LOC_Os01g65070.1	PH02Gene22304.t1
LOC_Os01g65080.1	PH02Gene22302.t1
LOC_Os01g65090.1	PH02Gene22301.t1
LOC_Os01g65100.3	PH02Gene22300.t1
LOC_Os01g65220.1	PH02Gene27849.t1
LOC_Os01g65230.1	PH02Gene27848.t1
LOC_Os01g65260.1	PH02Gene27847.t1
LOC_Os01g65310.1	PH02Gene27845.t1
LOC_Os01g65320.1	PH02Gene27844.t1
LOC_Os01g65330.1	PH02Gene27843.t1
LOC_Os01g65350.1	PH02Gene27842.t1
LOC_Os01g65370.1	PH02Gene27841.t1
LOC_Os01g65380.1	PH02Gene27840.t1
LOC_Os01g65400.4	PH02Gene27839.t6
LOC_Os01g65410.1	PH02Gene27836.t1
LOC_Os01g65420.1	PH02Gene27835.t1
LOC_Os01g65450.1	PH02Gene27834.t1
LOC_Os01g65460.1	PH02Gene27833.t1
LOC_Os01g65480.1	PH02Gene07840.t1
LOC_Os01g65490.1	PH02Gene07841.t1
LOC_Os01g65500.1	PH02Gene07842.t1
LOC_Os01g65510.1	PH02Gene07843.t1
LOC_Os01g65520.1	PH02Gene07844.t1
LOC_Os01g65530.1	PH02Gene07845.t1
LOC_Os01g65550.1	PH02Gene07846.t1
LOC_Os01g65580.1	PH02Gene07847.t1
LOC_Os01g65590.1	PH02Gene07848.t1
LOC_Os01g65600.1	PH02Gene07849.t1
LOC_Os01g65620.1	PH02Gene07851.t1
LOC_Os01g65650.1	PH02Gene07853.t1
LOC_Os01g65660.1	PH02Gene07854.t1
LOC_Os01g65680.1	PH02Gene07855.t1
LOC_Os01g65720.1	PH02Gene07856.t1
LOC_Os01g65730.1	PH02Gene07857.t1
LOC_Os01g65780.1	PH02Gene07859.t3
LOC_Os01g65790.1	PH02Gene07860.t1
LOC_Os01g65800.1	PH02Gene07861.t1
LOC_Os01g65830.1	PH02Gene07862.t1
LOC_Os01g65840.1	PH02Gene07863.t1
LOC_Os01g65860.1	PH02Gene07865.t1
LOC_Os01g65880.1	PH02Gene07867.t1
LOC_Os01g65890.1	PH02Gene07868.t2
LOC_Os01g65900.1	PH02Gene07869.t1
LOC_Os01g65920.1	PH02Gene07872.t3
LOC_Os01g65940.1	PH02Gene07873.t1
LOC_Os01g65986.1	PH02Gene07874.t1
LOC_Os01g65992.1	PH02Gene07875.t1
LOC_Os01g66000.1	PH02Gene07876.t2
LOC_Os01g66010.1	PH02Gene07877.t1
LOC_Os01g66020.1	PH02Gene07878.t1
LOC_Os01g66030.1	PH02Gene07879.t1
LOC_Os01g66050.1	PH02Gene07880.t1
LOC_Os01g66100.1	PH02Gene07881.t1
LOC_Os01g66110.1	PH02Gene07882.t1
LOC_Os01g66120.1	PH02Gene07883.t1
LOC_Os01g66130.1	PH02Gene07884.t2
LOC_Os01g66140.1	PH02Gene07885.t3
LOC_Os01g66150.1	PH02Gene07887.t1
LOC_Os01g66160.1	PH02Gene07888.t1
LOC_Os01g66170.1	PH02Gene07889.t1
LOC_Os01g66180.1	PH02Gene07891.t1
LOC_Os01g66190.1	PH02Gene07892.t1
LOC_Os01g66200.1	PH02Gene07893.t1
LOC_Os01g66240.1	PH02Gene07894.t1
LOC_Os01g66250.1	PH02Gene07895.t1
LOC_Os01g66280.1	PH02Gene07897.t1
LOC_Os01g66290.1	PH02Gene07900.t1
LOC_Os01g66300.1	PH02Gene07901.t1
LOC_Os01g66330.1	PH02Gene07902.t1
LOC_Os01g66350.1	PH02Gene07904.t1
LOC_Os01g66360.1	PH02Gene07905.t2
LOC_Os01g66379.1	PH02Gene07906.t2
LOC_Os01g66420.1	PH02Gene07907.t2
LOC_Os01g66490.1	PH02Gene07908.t1
LOC_Os01g66500.1	PH02Gene07909.t1
LOC_Os01g66520.1	PH02Gene07912.t1
LOC_Os01g66530.1	PH02Gene07914.t1
LOC_Os01g66544.1	PH02Gene07916.t1
LOC_Os01g66560.1	PH02Gene07919.t1
LOC_Os01g66580.1	PH02Gene07921.t1
LOC_Os01g66590.1	PH02Gene07923.t1
LOC_Os01g66600.1	PH02Gene07924.t1
LOC_Os01g66610.1	PH02Gene48601.t1
LOC_Os01g66690.1	PH02Gene27104.t1
LOC_Os01g66700.1	PH02Gene27106.t1
LOC_Os01g66710.1	PH02Gene27107.t1
LOC_Os01g66860.2	PH02Gene27111.t1
LOC_Os01g66900.1	PH02Gene27117.t1
LOC_Os01g67000.1	PH02Gene27120.t1
LOC_Os01g67090.1	PH02Gene27127.t1
LOC_Os01g67100.1	PH02Gene27129.t1
LOC_Os01g67120.1	PH02Gene27130.t1
LOC_Os01g67134.1	PH02Gene29817.t1
LOC_Os01g67170.1	PH02Gene29818.t1
LOC_Os01g67180.1	PH02Gene29819.t1
LOC_Os01g67210.1	PH02Gene29821.t1
LOC_Os01g67240.1	PH02Gene29822.t1
LOC_Os01g67250.1	PH02Gene29823.t1
LOC_Os01g67290.1	PH02Gene29824.t2
LOC_Os01g67300.1	PH02Gene29825.t1
LOC_Os01g67310.1	PH02Gene29826.t1
LOC_Os01g67330.1	PH02Gene29828.t2
LOC_Os01g67340.1	PH02Gene29829.t2
LOC_Os01g67360.1	PH02Gene29830.t1
LOC_Os01g67370.1	PH02Gene29831.t1
LOC_Os01g67390.1	PH02Gene29832.t1
LOC_Os01g67410.1	PH02Gene29833.t1
LOC_Os01g67420.1	PH02Gene29834.t1
LOC_Os01g67430.1	PH02Gene29835.t1
LOC_Os01g67480.1	PH02Gene29836.t1
LOC_Os01g67500.1	PH02Gene29837.t1
LOC_Os01g67510.1	PH02Gene29838.t1
LOC_Os01g67530.1	PH02Gene45698.t1
LOC_Os01g67550.1	PH02Gene45699.t1
LOC_Os01g67560.2	PH02Gene45700.t2
LOC_Os01g67580.1	PH02Gene45702.t1
LOC_Os01g67590.1	PH02Gene45703.t1
LOC_Os01g67600.1	PH02Gene45704.t1
LOC_Os01g67630.1	PH02Gene45705.t1
LOC_Os01g67650.1	PH02Gene45706.t1
LOC_Os01g67720.1	PH02Gene13614.t1
LOC_Os01g67740.1	PH02Gene13613.t1
LOC_Os01g67770.1	PH02Gene13612.t1
LOC_Os01g67810.1	PH02Gene13611.t1
LOC_Os01g67830.1	PH02Gene13610.t1
LOC_Os01g67850.1	PH02Gene13609.t1
LOC_Os01g67860.1	PH02Gene13607.t1
LOC_Os01g67870.1	PH02Gene13605.t1
LOC_Os01g67880.1	PH02Gene13604.t1
LOC_Os01g67920.1	PH02Gene13602.t1
LOC_Os01g67950.1	PH02Gene13601.t1
LOC_Os01g67970.1	PH02Gene13600.t1
LOC_Os01g67980.1	PH02Gene13599.t1
LOC_Os01g68000.1	PH02Gene13598.t1
LOC_Os01g68010.1	PH02Gene13597.t1
LOC_Os01g68020.1	PH02Gene13595.t1
LOC_Os01g68040.1	PH02Gene13594.t1
LOC_Os01g68050.2	PH02Gene13592.t1
LOC_Os01g68060.1	PH02Gene13591.t1
LOC_Os01g68070.1	PH02Gene13589.t1
LOC_Os01g68120.1	PH02Gene13588.t2
LOC_Os01g68140.1	PH02Gene13586.t1
LOC_Os01g68290.1	PH02Gene13581.t1
LOC_Os01g68300.1	PH02Gene13580.t1
LOC_Os01g68320.1	PH02Gene13579.t1
LOC_Os01g68324.3	PH02Gene13578.t1
LOC_Os01g68330.1	PH02Gene13577.t1
LOC_Os01g68380.1	PH02Gene13576.t1
LOC_Os01g68390.1	PH02Gene13575.t1
LOC_Os01g68420.1	PH02Gene13574.t1
LOC_Os01g68440.1	PH02Gene13573.t2
LOC_Os01g68460.1	PH02Gene13572.t1
LOC_Os01g68480.1	PH02Gene13571.t1
LOC_Os01g68490.1	PH02Gene13570.t1
LOC_Os01g68500.1	PH02Gene13569.t1
LOC_Os01g68510.1	PH02Gene04919.t1
LOC_Os01g68524.1	PH02Gene04918.t3
LOC_Os01g68540.1	PH02Gene04917.t1
LOC_Os01g68560.1	PH02Gene04916.t1
LOC_Os01g68570.1	PH02Gene04915.t1
LOC_Os01g68580.1	PH02Gene04914.t1
LOC_Os01g68598.2	PH02Gene04912.t1
LOC_Os01g68620.1	PH02Gene04911.t1
LOC_Os01g68630.1	PH02Gene04910.t1
LOC_Os01g68650.1	PH02Gene04909.t1
LOC_Os01g68660.1	PH02Gene04908.t1
LOC_Os01g68680.1	PH02Gene04907.t1
LOC_Os01g68700.1	PH02Gene04905.t1
LOC_Os01g68710.1	PH02Gene48265.t1
LOC_Os01g68740.1	PH02Gene48263.t1
LOC_Os01g68750.1	PH02Gene48261.t1
LOC_Os01g68760.1	PH02Gene48260.t1
LOC_Os01g68770.1	PH02Gene42366.t1
LOC_Os01g68800.1	PH02Gene42367.t1
LOC_Os01g68810.1	PH02Gene42368.t1
LOC_Os01g68830.1	PH02Gene42369.t1
LOC_Os01g68840.1	PH02Gene42370.t1
LOC_Os01g68860.1	PH02Gene42371.t1
LOC_Os01g68870.2	PH02Gene42372.t1
LOC_Os01g68890.1	PH02Gene42373.t1
LOC_Os01g68900.1	PH02Gene42374.t1
LOC_Os01g68930.1	PH02Gene42375.t1
LOC_Os01g68940.1	PH02Gene42376.t1
LOC_Os01g68960.1	PH02Gene42378.t1
LOC_Os01g68970.2	PH02Gene42379.t1
LOC_Os01g69030.1	PH02Gene07232.t1
LOC_Os01g69040.1	PH02Gene07234.t1
LOC_Os01g69050.1	PH02Gene07235.t1
LOC_Os01g69070.1	PH02Gene07236.t1
LOC_Os01g69080.1	PH02Gene07237.t1
LOC_Os01g69090.1	PH02Gene07238.t1
LOC_Os01g69100.1	PH02Gene07239.t1
LOC_Os01g69110.1	PH02Gene07240.t3
LOC_Os01g69120.1	PH02Gene07241.t1
LOC_Os01g69130.1	PH02Gene07242.t1
LOC_Os01g69140.1	PH02Gene07244.t1
LOC_Os01g69160.1	PH02Gene07245.t1
LOC_Os01g69210.1	PH02Gene07246.t1
LOC_Os01g69230.1	PH02Gene07247.t1
LOC_Os01g69240.1	PH02Gene07248.t1
LOC_Os01g69250.1	PH02Gene07249.t1
LOC_Os01g69270.1	PH02Gene07250.t1
LOC_Os01g69290.1	PH02Gene07252.t1
LOC_Os01g69830.1	PH02Gene07253.t1
LOC_Os01g69840.1	PH02Gene07254.t1
LOC_Os01g69850.1	PH02Gene07255.t1
LOC_Os01g69900.1	PH02Gene07257.t1
LOC_Os01g69910.3	PH02Gene07259.t1
LOC_Os01g69920.1	PH02Gene07260.t1
LOC_Os01g69930.1	PH02Gene07261.t1
LOC_Os01g69940.1	PH02Gene07262.t1
LOC_Os01g69950.1	PH02Gene07263.t1
LOC_Os01g69970.1	PH02Gene07264.t1
LOC_Os01g69990.1	PH02Gene07268.t2
LOC_Os01g70010.1	PH02Gene07269.t1
LOC_Os01g70020.1	PH02Gene07271.t1
LOC_Os01g70060.1	PH02Gene07272.t1
LOC_Os01g70100.1	PH02Gene07273.t1
LOC_Os01g70110.1	PH02Gene07274.t1
LOC_Os01g70130.1	PH02Gene07275.t1
LOC_Os01g70140.1	PH02Gene07277.t1
LOC_Os01g70150.1	PH02Gene07278.t1
LOC_Os01g70160.1	PH02Gene07279.t1
LOC_Os01g70170.1	PH02Gene07280.t1
LOC_Os01g70180.1	PH02Gene07281.t1
LOC_Os01g70210.1	PH02Gene07284.t3
LOC_Os01g70220.1	PH02Gene07287.t1
LOC_Os01g70230.1	PH02Gene07288.t1
LOC_Os01g70240.1	PH02Gene07289.t1
LOC_Os01g70250.1	PH02Gene07290.t1
LOC_Os01g70260.1	PH02Gene07291.t1
LOC_Os01g70270.1	PH02Gene07292.t1
LOC_Os01g70310.1	PH02Gene07293.t1
LOC_Os01g70320.1	PH02Gene07294.t1
LOC_Os01g70330.1	PH02Gene07295.t1
LOC_Os01g70340.1	PH02Gene07296.t1
LOC_Os01g70360.1	PH02Gene07297.t1
LOC_Os01g70390.1	PH02Gene14221.t1
LOC_Os01g70410.1	PH02Gene14222.t1
LOC_Os01g70430.1	PH02Gene14223.t2
LOC_Os01g70470.1	PH02Gene14224.t1
LOC_Os01g70500.1	PH02Gene14225.t1
LOC_Os01g70520.1	PH02Gene14226.t1
LOC_Os01g70525.1	PH02Gene14227.t1
LOC_Os01g70550.1	PH02Gene14228.t1
LOC_Os01g70560.1	PH02Gene14229.t1
LOC_Os01g70580.1	PH02Gene14230.t1
LOC_Os01g70590.1	PH02Gene14231.t1
LOC_Os01g70660.1	PH02Gene14233.t1
LOC_Os01g70670.1	PH02Gene14234.t1
LOC_Os01g70690.1	PH02Gene14235.t1
LOC_Os01g70710.1	PH02Gene14236.t1
LOC_Os01g70770.1	PH02Gene14237.t1
LOC_Os01g70780.1	PH02Gene14238.t1
LOC_Os01g70790.1	PH02Gene14239.t1
LOC_Os01g70800.1	PH02Gene14241.t1
LOC_Os01g70810.1	PH02Gene14245.t1
LOC_Os01g70820.1	PH02Gene14246.t1
LOC_Os01g70830.1	PH02Gene14247.t1
LOC_Os01g70870.1	PH02Gene14249.t1
LOC_Os01g70880.1	PH02Gene14250.t1
LOC_Os01g70920.2	PH02Gene09196.t1
LOC_Os01g70930.1	PH02Gene09195.t1
LOC_Os01g70940.1	PH02Gene09194.t1
LOC_Os01g70960.2	PH02Gene09192.t1
LOC_Os01g70970.1	PH02Gene09190.t1
LOC_Os01g70980.1	PH02Gene09189.t2
LOC_Os01g70990.1	PH02Gene09188.t1
LOC_Os01g71000.1	PH02Gene09187.t1
LOC_Os01g71010.1	PH02Gene09186.t1
LOC_Os01g71040.1	PH02Gene09185.t1
LOC_Os01g71050.1	PH02Gene09184.t1
LOC_Os01g71060.1	PH02Gene09183.t1
LOC_Os01g71090.1	PH02Gene09182.t1
LOC_Os01g71200.1	PH02Gene29903.t1
LOC_Os01g71210.1	PH02Gene29902.t1
LOC_Os01g71220.1	PH02Gene29901.t1
LOC_Os01g71230.1	PH02Gene29900.t1
LOC_Os01g71240.1	PH02Gene29898.t1
LOC_Os01g71256.1	PH02Gene29897.t1
LOC_Os01g71262.1	PH02Gene29896.t1
LOC_Os01g71270.1	PH02Gene29895.t1
LOC_Os01g71300.1	PH02Gene29894.t2
LOC_Os01g71310.1	PH02Gene29893.t1
LOC_Os01g71320.1	PH02Gene29892.t1
LOC_Os01g71330.1	PH02Gene29891.t1
LOC_Os01g71340.1	PH02Gene29890.t1
LOC_Os01g71350.1	PH02Gene29887.t1
LOC_Os01g38950.1	PH02Gene22171.t1
LOC_Os01g38970.1	PH02Gene22172.t1
LOC_Os01g38980.2	PH02Gene22173.t1
LOC_Os01g38990.1	PH02Gene22174.t1
LOC_Os01g39000.1	PH02Gene22175.t1
LOC_Os01g39020.1	PH02Gene22176.t1
LOC_Os01g39100.1	PH02Gene22177.t3
LOC_Os01g39110.1	PH02Gene22178.t1
LOC_Os01g39150.1	PH02Gene22183.t1
LOC_Os01g39250.1	PH02Gene22184.t1
LOC_Os01g39270.1	PH02Gene22185.t2
LOC_Os01g39290.1	PH02Gene22186.t1
LOC_Os01g39310.1	PH02Gene28273.t1
LOC_Os01g39330.1	PH02Gene28274.t1
LOC_Os01g39380.1	PH02Gene28275.t1
LOC_Os01g39600.1	PH02Gene28276.t1
LOC_Os01g39690.1	PH02Gene28279.t1
LOC_Os01g39790.1	PH02Gene28280.t1
LOC_Os01g39830.1	PH02Gene28282.t1
LOC_Os01g39890.1	PH02Gene28283.t2
LOC_Os01g39960.1	PH02Gene28284.t1
LOC_Os01g39970.1	PH02Gene28285.t1
LOC_Os01g40050.2	PH02Gene28287.t1
LOC_Os01g40070.1	PH02Gene28289.t1
LOC_Os01g40094.1	PH02Gene28290.t1
LOC_Os01g40110.1	PH02Gene28291.t2
LOC_Os01g40190.1	PH02Gene28292.t1
LOC_Os01g40200.1	PH02Gene11962.t4
LOC_Os01g40240.1	PH02Gene11966.t1
LOC_Os01g40250.1	PH02Gene11968.t1
LOC_Os01g40260.1	PH02Gene11970.t1
LOC_Os01g40280.1	PH02Gene11971.t1
LOC_Os01g40310.1	PH02Gene11972.t1
LOC_Os01g40330.1	PH02Gene11973.t2
LOC_Os01g40340.1	PH02Gene11974.t1
LOC_Os01g40420.2	PH02Gene11975.t1
LOC_Os01g40430.1	PH02Gene11976.t1
LOC_Os01g40450.1	PH02Gene11978.t1
LOC_Os01g40470.1	PH02Gene11979.t1
LOC_Os01g40480.1	PH02Gene11980.t1
LOC_Os01g40530.1	PH02Gene11981.t1
LOC_Os01g40560.1	PH02Gene11983.t1
LOC_Os01g40570.1	PH02Gene11984.t1
LOC_Os01g40590.1	PH02Gene11986.t1
LOC_Os01g40600.1	PH02Gene11987.t1
LOC_Os01g40630.1	PH02Gene11990.t1
LOC_Os01g40640.1	PH02Gene11991.t3
LOC_Os01g40660.1	PH02Gene11992.t1
LOC_Os01g40670.1	PH02Gene11994.t1
LOC_Os01g40680.1	PH02Gene11995.t1
LOC_Os01g40700.1	PH02Gene11996.t2
LOC_Os01g40710.1	PH02Gene11997.t1
LOC_Os01g40720.1	PH02Gene11998.t1
LOC_Os01g40840.1	PH02Gene12001.t1
LOC_Os01g40860.1	PH02Gene12002.t1
LOC_Os01g40970.1	PH02Gene12003.t1
LOC_Os01g40980.1	PH02Gene12004.t1
LOC_Os01g40990.2	PH02Gene12005.t1
LOC_Os01g41010.1	PH02Gene12006.t3
LOC_Os01g41030.1	PH02Gene12007.t1
LOC_Os01g41040.1	PH02Gene12008.t1
LOC_Os01g41120.1	PH02Gene12009.t1
LOC_Os01g41190.1	PH02Gene12011.t1
LOC_Os01g41200.1	PH02Gene12012.t1
LOC_Os01g41220.1	PH02Gene12013.t1
LOC_Os01g41260.1	PH02Gene30590.t1
LOC_Os01g41290.1	PH02Gene30588.t1
LOC_Os01g41340.1	PH02Gene30587.t1
LOC_Os01g41400.1	PH02Gene34870.t1
LOC_Os01g41510.1	PH02Gene34865.t1
LOC_Os01g41530.1	PH02Gene34857.t1
LOC_Os01g41550.1	PH02Gene34856.t1
LOC_Os01g41600.1	PH02Gene34855.t1
LOC_Os01g41610.1	PH02Gene34854.t2
LOC_Os01g41630.1	PH02Gene34853.t2
LOC_Os01g41640.1	PH02Gene45536.t1
LOC_Os01g41660.1	PH02Gene45537.t2
LOC_Os01g41710.1	PH02Gene45538.t1
LOC_Os01g41720.1	PH02Gene45539.t1
LOC_Os01g41730.1	PH02Gene45540.t1
LOC_Os01g41750.1	PH02Gene45544.t1
LOC_Os01g41870.1	PH02Gene45548.t1
LOC_Os01g41880.1	PH02Gene36757.t1
LOC_Os01g41900.1	PH02Gene36756.t1
LOC_Os01g41950.1	PH02Gene36755.t1
LOC_Os01g41990.1	PH02Gene36751.t1
LOC_Os01g42010.1	PH02Gene36750.t1
LOC_Os01g42030.1	PH02Gene36749.t1
LOC_Os01g42050.1	PH02Gene36748.t1
LOC_Os01g42040.1	PH02Gene36747.t1
LOC_Os01g42060.1	PH02Gene36746.t1
LOC_Os01g42070.1	PH02Gene36745.t1
LOC_Os01g42080.1	PH02Gene36744.t1
LOC_Os01g42090.1	PH02Gene36743.t1
LOC_Os01g42120.1	PH02Gene36739.t3
LOC_Os01g42140.1	PH02Gene36738.t1
LOC_Os01g42190.1	PH02Gene13533.t1
LOC_Os01g42210.1	PH02Gene13532.t1
LOC_Os01g42234.1	PH02Gene13528.t1
LOC_Os01g42260.1	PH02Gene21483.t1
LOC_Os01g42280.1	PH02Gene21485.t1
LOC_Os01g42294.1	PH02Gene21486.t1
LOC_Os01g42350.1	PH02Gene21488.t1
LOC_Os01g42410.1	PH02Gene21492.t1
LOC_Os01g42460.1	PH02Gene13538.t1
LOC_Os01g42470.1	PH02Gene13539.t1
LOC_Os01g42480.1	PH02Gene13540.t2
LOC_Os01g42500.1	PH02Gene13541.t1
LOC_Os01g42520.1	PH02Gene13542.t1
LOC_Os01g42620.1	PH02Gene13544.t1
LOC_Os01g42650.1	PH02Gene13551.t1
LOC_Os01g42690.1	PH02Gene13552.t1
LOC_Os01g42700.1	PH02Gene13553.t1
LOC_Os01g42710.1	PH02Gene13554.t1
LOC_Os01g42730.1	PH02Gene13556.t1
LOC_Os01g42780.1	PH02Gene13557.t1
LOC_Os01g42800.1	PH02Gene13558.t2
LOC_Os01g42810.1	PH02Gene13559.t1
LOC_Os01g42820.2	PH02Gene13560.t1
LOC_Os01g42830.1	PH02Gene13562.t1
LOC_Os01g42870.1	PH02Gene13563.t1
LOC_Os01g42900.1	PH02Gene13565.t1
LOC_Os01g42950.1	PH02Gene13566.t1
LOC_Os01g42960.1	PH02Gene13567.t1
LOC_Os01g42970.1	PH02Gene19983.t1
LOC_Os01g42980.1	PH02Gene19984.t1
LOC_Os01g42990.1	PH02Gene19985.t1
LOC_Os01g43020.1	PH02Gene19986.t1
LOC_Os01g43030.1	PH02Gene19987.t1
LOC_Os01g43050.1	PH02Gene19988.t2
LOC_Os01g43060.1	PH02Gene19989.t1
LOC_Os01g43090.1	PH02Gene19990.t3
LOC_Os01g43100.1	PH02Gene19991.t1
LOC_Os01g43120.1	PH02Gene19992.t1
LOC_Os01g43140.1	PH02Gene19993.t1
LOC_Os01g43150.2	PH02Gene19994.t1
LOC_Os01g43160.1	PH02Gene19996.t1
LOC_Os01g43170.1	PH02Gene33664.t1
LOC_Os01g43180.1	PH02Gene33665.t1
LOC_Os01g43250.1	PH02Gene33667.t1
LOC_Os01g43320.1	PH02Gene33673.t1
LOC_Os01g43330.1	PH02Gene33674.t1
LOC_Os01g43350.1	PH02Gene33675.t1
LOC_Os01g43360.1	PH02Gene33677.t1
LOC_Os01g43370.1	PH02Gene33678.t1
LOC_Os01g43380.1	PH02Gene33679.t2
LOC_Os01g43390.1	PH02Gene33680.t2
LOC_Os01g43410.1	PH02Gene48423.t1
LOC_Os01g43440.1	PH02Gene48422.t1
LOC_Os01g43460.1	PH02Gene48421.t1
LOC_Os01g43480.1	PH02Gene40334.t1
LOC_Os01g43490.1	PH02Gene40335.t1
LOC_Os01g43510.1	PH02Gene40336.t1
LOC_Os01g43520.1	PH02Gene40337.t1
LOC_Os01g43530.1	PH02Gene40338.t1
LOC_Os01g43540.1	PH02Gene40339.t1
LOC_Os01g43550.2	PH02Gene40340.t1
LOC_Os01g43580.1	PH02Gene40341.t1
LOC_Os01g43590.2	PH02Gene40343.t1
LOC_Os01g43610.1	PH02Gene40344.t1
LOC_Os01g43630.3	PH02Gene40346.t1
LOC_Os01g43650.1	PH02Gene40347.t1
LOC_Os01g43700.2	PH02Gene35573.t1
LOC_Os01g43720.1	PH02Gene35574.t1
LOC_Os01g43760.1	PH02Gene35575.t1
LOC_Os01g43844.1	PH02Gene35579.t1
LOC_Os01g43870.1	PH02Gene43824.t1
LOC_Os01g43910.1	PH02Gene43823.t1
LOC_Os01g43940.1	PH02Gene43822.t1
LOC_Os01g43950.1	PH02Gene43821.t1
LOC_Os01g44040.1	PH02Gene46620.t1
LOC_Os01g44069.1	PH02Gene39283.t1
LOC_Os01g44090.1	PH02Gene39281.t1
LOC_Os01g44110.1	PH02Gene39280.t1
LOC_Os01g44120.1	PH02Gene39279.t1
LOC_Os01g44130.1	PH02Gene39278.t1
LOC_Os01g44140.1	PH02Gene39277.t1
LOC_Os01g44210.1	PH02Gene39276.t1
LOC_Os01g44310.1	PH02Gene39275.t2
LOC_Os01g44330.1	PH02Gene39274.t1
LOC_Os01g44340.1	PH02Gene39273.t1
LOC_Os01g44360.1	PH02Gene39272.t1
LOC_Os01g44370.1	PH02Gene39271.t1
LOC_Os01g44394.1	PH02Gene39270.t2
LOC_Os01g44430.1	PH02Gene39269.t1
LOC_Os01g44960.1	PH02Gene39268.t1
LOC_Os01g45060.1	PH02Gene39267.t1
LOC_Os01g45070.1	PH02Gene39266.t1
LOC_Os01g45090.1	PH02Gene39265.t1
LOC_Os01g45110.1	PH02Gene30524.t1
LOC_Os01g45200.1	PH02Gene30525.t1
LOC_Os01g45250.1	PH02Gene30527.t1
LOC_Os01g45274.2	PH02Gene30528.t1
LOC_Os01g45350.1	PH02Gene30529.t1
LOC_Os01g45370.1	PH02Gene30531.t2
LOC_Os01g45380.1	PH02Gene30532.t1
LOC_Os01g45390.2	PH02Gene30533.t1
LOC_Os01g45400.1	PH02Gene30534.t1
LOC_Os01g45439.1	PH02Gene30535.t6
LOC_Os01g45450.1	PH02Gene30536.t1
LOC_Os01g45460.1	PH02Gene30539.t1
LOC_Os01g45470.1	PH02Gene30541.t1
LOC_Os01g45510.1	PH02Gene30542.t1
LOC_Os01g45530.1	PH02Gene30543.t1
LOC_Os01g45550.1	PH02Gene30544.t1
LOC_Os01g45570.1	PH02Gene40879.t1
LOC_Os01g45620.1	PH02Gene40878.t1
LOC_Os01g45650.1	PH02Gene40876.t1
LOC_Os01g45730.1	PH02Gene40873.t1
LOC_Os01g45750.1	PH02Gene50351.t1
LOC_Os01g45760.1	PH02Gene42797.t1
LOC_Os01g45830.1	PH02Gene42795.t1
LOC_Os01g45840.1	PH02Gene42794.t1
LOC_Os01g45860.1	PH02Gene42793.t1
LOC_Os01g45960.1	PH02Gene30981.t1
LOC_Os01g45990.1	PH02Gene30982.t1
LOC_Os01g46020.1	PH02Gene30985.t1
LOC_Os01g46030.1	PH02Gene30986.t1
LOC_Os01g46080.1	PH02Gene30990.t1
LOC_Os01g46240.1	PH02Gene30994.t1
LOC_Os01g46260.1	PH02Gene30996.t1
LOC_Os01g46270.1	PH02Gene30998.t1
LOC_Os01g46340.1	PH02Gene31000.t1
LOC_Os01g46350.1	PH02Gene31001.t1
LOC_Os01g46380.1	PH02Gene17345.t1
LOC_Os01g46400.1	PH02Gene17344.t1
LOC_Os01g46430.1	PH02Gene17342.t1
LOC_Os01g46440.1	PH02Gene17341.t1
LOC_Os01g46510.1	PH02Gene17340.t1
LOC_Os01g46570.1	PH02Gene17339.t3
LOC_Os01g46580.1	PH02Gene17338.t1
LOC_Os01g46600.1	PH02Gene17337.t1
LOC_Os01g46610.1	PH02Gene17336.t1
LOC_Os01g46700.1	PH02Gene17335.t1
LOC_Os01g46710.1	PH02Gene17334.t1
LOC_Os01g46720.1	PH02Gene17333.t1
LOC_Os01g46750.1	PH02Gene39954.t1
LOC_Os01g46760.1	PH02Gene39952.t2
LOC_Os01g46800.1	PH02Gene39950.t1
LOC_Os01g46810.1	PH02Gene39949.t3
LOC_Os01g46860.1	PH02Gene39948.t1
LOC_Os01g46870.1	PH02Gene07654.t1
LOC_Os01g46926.1	PH02Gene07655.t1
LOC_Os01g46932.1	PH02Gene07656.t3
LOC_Os01g46940.1	PH02Gene07657.t1
LOC_Os01g46950.1	PH02Gene07658.t1
LOC_Os01g46970.1	PH02Gene07659.t1
LOC_Os01g46980.1	PH02Gene07660.t1
LOC_Os01g47040.1	PH02Gene07662.t1
LOC_Os01g47050.1	PH02Gene07663.t1
LOC_Os01g47080.1	PH02Gene07664.t1
LOC_Os01g47180.1	PH02Gene07665.t1
LOC_Os01g47360.1	PH02Gene40962.t1
LOC_Os01g47430.1	PH02Gene31834.t1
LOC_Os01g47450.1	PH02Gene31835.t1
LOC_Os01g47460.1	PH02Gene31838.t1
LOC_Os01g47470.1	PH02Gene31839.t3
LOC_Os01g47490.2	PH02Gene49848.t1
LOC_Os01g47530.1	PH02Gene31840.t1
LOC_Os01g47540.1	PH02Gene31842.t1
LOC_Os01g71650.1	PH02Gene29890.t1
LOC_Os01g71680.1	PH02Gene29889.t1
LOC_Os01g71690.3	PH02Gene29882.t1
LOC_Os01g71700.1	PH02Gene29880.t1
LOC_Os01g71770.1	PH02Gene37891.t1
LOC_Os01g71930.1	PH02Gene37890.t1
LOC_Os01g71960.1	PH02Gene37889.t1
LOC_Os01g71970.1	PH02Gene37888.t1
LOC_Os01g71980.1	PH02Gene37887.t1
LOC_Os01g71990.1	PH02Gene37886.t1
LOC_Os01g72000.1	PH02Gene37885.t1
LOC_Os01g72009.1	PH02Gene37884.t1
LOC_Os01g72020.1	PH02Gene37883.t1
LOC_Os01g72080.1	PH02Gene37879.t1
LOC_Os01g72090.1	PH02Gene37878.t1
LOC_Os01g72120.1	PH02Gene37876.t1
LOC_Os01g72130.1	PH02Gene37874.t1
LOC_Os01g72190.1	PH02Gene21037.t1
LOC_Os01g72200.1	PH02Gene21038.t1
LOC_Os01g72220.1	PH02Gene21041.t1
LOC_Os01g72240.1	PH02Gene21042.t2
LOC_Os01g72260.1	PH02Gene21043.t1
LOC_Os01g72290.1	PH02Gene21048.t1
LOC_Os01g72310.1	PH02Gene21051.t1
LOC_Os01g72320.1	PH02Gene21052.t1
LOC_Os01g72330.1	PH02Gene21053.t1
LOC_Os01g72340.1	PH02Gene21055.t1
LOC_Os01g72350.1	PH02Gene21056.t2
LOC_Os01g72360.1	PH02Gene21057.t1
LOC_Os01g72420.1	PH02Gene21060.t1
LOC_Os01g72430.1	PH02Gene21061.t1
LOC_Os01g72470.1	PH02Gene21064.t1
LOC_Os01g72480.1	PH02Gene21065.t1
LOC_Os01g72490.1	PH02Gene21066.t1
LOC_Os01g72510.1	PH02Gene48636.t1
LOC_Os01g72520.1	PH02Gene48637.t1
LOC_Os01g72530.1	PH02Gene48873.t1
LOC_Os01g72560.1	PH02Gene48870.t1
LOC_Os01g72570.1	PH02Gene06804.t1
LOC_Os01g72600.1	PH02Gene06805.t1
LOC_Os01g72610.1	PH02Gene06806.t1
LOC_Os01g72680.1	PH02Gene06807.t1
LOC_Os01g72690.1	PH02Gene06808.t1
LOC_Os01g72700.1	PH02Gene06809.t1
LOC_Os01g72710.1	PH02Gene06810.t1
LOC_Os01g72730.1	PH02Gene06815.t1
LOC_Os01g72780.1	PH02Gene06816.t1
LOC_Os01g72790.1	PH02Gene06817.t1
LOC_Os01g72800.1	PH02Gene06818.t1
LOC_Os01g72810.1	PH02Gene06819.t1
LOC_Os01g72820.1	PH02Gene06821.t1
LOC_Os01g72834.1	PH02Gene06822.t1
LOC_Os01g72860.1	PH02Gene06823.t1
LOC_Os01g72870.1	PH02Gene06824.t1
LOC_Os01g72880.1	PH02Gene06825.t1
LOC_Os01g72890.1	PH02Gene06826.t1
LOC_Os01g72930.1	PH02Gene06827.t1
LOC_Os01g72940.1	PH02Gene06828.t1
LOC_Os01g72950.1	PH02Gene06830.t1
LOC_Os01g72970.1	PH02Gene06833.t1
LOC_Os01g72980.1	PH02Gene06834.t1
LOC_Os01g73000.1	PH02Gene06835.t1
LOC_Os01g73040.1	PH02Gene06840.t3
LOC_Os01g73120.1	PH02Gene06843.t1
LOC_Os01g73130.1	PH02Gene48534.t1
LOC_Os01g73140.1	PH02Gene48535.t1
LOC_Os01g73150.1	PH02Gene48536.t1
LOC_Os01g73170.1	PH02Gene06848.t1
LOC_Os01g73230.1	PH02Gene06851.t2
LOC_Os01g73234.2	PH02Gene06852.t1
LOC_Os01g73250.1	PH02Gene06853.t1
LOC_Os01g73300.1	PH02Gene06857.t1
LOC_Os01g73310.1	PH02Gene06858.t1
LOC_Os01g73390.1	PH02Gene06861.t1
LOC_Os01g73410.1	PH02Gene06862.t1
LOC_Os01g73420.1	PH02Gene06863.t1
LOC_Os01g73430.1	PH02Gene06864.t1
LOC_Os01g73450.1	PH02Gene06865.t1
LOC_Os01g73460.1	PH02Gene06866.t1
LOC_Os01g73470.1	PH02Gene06867.t1
LOC_Os01g73480.1	PH02Gene06868.t1
LOC_Os01g73490.1	PH02Gene06870.t1
LOC_Os01g73500.1	PH02Gene06871.t1
LOC_Os01g73530.2	PH02Gene06872.t1
LOC_Os01g73540.1	PH02Gene06873.t1
LOC_Os01g73550.1	PH02Gene06874.t1
LOC_Os01g73560.1	PH02Gene06875.t1
LOC_Os01g73580.1	PH02Gene06876.t1
LOC_Os01g73630.1	PH02Gene06877.t1
LOC_Os01g73680.1	PH02Gene06881.t1
LOC_Os01g73690.1	PH02Gene06882.t2
LOC_Os01g73700.1	PH02Gene06883.t1
LOC_Os01g73760.1	PH02Gene06887.t1
LOC_Os01g73780.1	PH02Gene06888.t1
LOC_Os01g73790.1	PH02Gene06889.t1
LOC_Os01g73800.1	PH02Gene06890.t1
LOC_Os01g73880.1	PH02Gene39009.t1
LOC_Os01g18670.1	PH02Gene37590.t1
LOC_Os01g18744.1	PH02Gene35077.t1
LOC_Os01g18800.1	PH02Gene35076.t1
LOC_Os01g18840.1	PH02Gene35075.t1
LOC_Os01g18850.1	PH02Gene35071.t2
LOC_Os01g18860.1	PH02Gene35072.t1
LOC_Os01g18870.1	PH02Gene35069.t1
LOC_Os01g18880.2	PH02Gene35068.t1
LOC_Os01g18910.1	PH02Gene35065.t1
LOC_Os01g19130.1	PH02Gene49920.t1
LOC_Os01g19150.1	PH02Gene41686.t1
LOC_Os01g19170.1	PH02Gene41682.t1
LOC_Os01g19220.1	PH02Gene29738.t1
LOC_Os01g19240.1	PH02Gene29740.t1
LOC_Os01g19330.1	PH02Gene29742.t1
LOC_Os01g19380.1	PH02Gene29746.t1
LOC_Os01g19390.1	PH02Gene29747.t1
LOC_Os01g19400.1	PH02Gene29748.t1
LOC_Os01g19450.1	PH02Gene29749.t1
LOC_Os01g19470.1	PH02Gene29750.t1
LOC_Os01g19480.1	PH02Gene29751.t1
LOC_Os01g19490.1	PH02Gene48550.t3
LOC_Os01g19610.1	PH02Gene31876.t1
LOC_Os01g19694.1	PH02Gene31875.t1
LOC_Os01g19740.1	PH02Gene31874.t1
LOC_Os01g19760.1	PH02Gene31870.t1
LOC_Os01g19770.1	PH02Gene31869.t1
LOC_Os01g19800.1	PH02Gene31868.t1
LOC_Os01g19820.2	PH02Gene31867.t1
LOC_Os01g19840.1	PH02Gene31866.t1
LOC_Os01g19850.1	PH02Gene31865.t1
LOC_Os01g19940.1	PH02Gene31864.t1
LOC_Os01g19970.1	PH02Gene31863.t1
LOC_Os01g19990.1	PH02Gene31862.t1
LOC_Os01g20120.1	PH02Gene31861.t1
LOC_Os01g20730.1	PH02Gene31858.t1
LOC_Os01g20830.1	PH02Gene36339.t1
LOC_Os01g20840.1	PH02Gene36340.t1
LOC_Os01g20860.1	PH02Gene36341.t1
LOC_Os01g20910.1	PH02Gene36343.t1
LOC_Os01g20930.1	PH02Gene36344.t1
LOC_Os01g20940.1	PH02Gene36345.t1
LOC_Os01g20970.1	PH02Gene36346.t1
LOC_Os01g20980.1	PH02Gene36347.t1
LOC_Os01g21034.2	PH02Gene36348.t1
LOC_Os01g21070.1	PH02Gene36349.t1
LOC_Os01g21120.1	PH02Gene31767.t1
LOC_Os01g21160.1	PH02Gene31768.t1
LOC_Os01g21180.1	PH02Gene31769.t1
LOC_Os01g21240.1	PH02Gene31773.t1
LOC_Os01g21250.1	PH02Gene38042.t1
LOC_Os01g21300.1	PH02Gene38043.t1
LOC_Os01g21320.1	PH02Gene38044.t1
LOC_Os01g21380.1	PH02Gene38045.t1
LOC_Os01g21450.3	PH02Gene08088.t1
LOC_Os01g21520.1	PH02Gene08087.t1
LOC_Os01g21590.1	PH02Gene08084.t1
LOC_Os01g21610.1	PH02Gene08081.t1
LOC_Os01g21630.1	PH02Gene08079.t2
LOC_Os01g21820.1	PH02Gene08078.t1
LOC_Os01g21850.1	PH02Gene08077.t1
LOC_Os01g21860.1	PH02Gene08076.t1
LOC_Os01g21940.1	PH02Gene08075.t1
LOC_Os01g21960.1	PH02Gene08074.t1
LOC_Os01g21970.1	PH02Gene08073.t1
LOC_Os01g21990.1	PH02Gene08072.t1
LOC_Os01g22010.1	PH02Gene08070.t1
LOC_Os01g22230.1	PH02Gene08069.t1
LOC_Os01g22390.2	PH02Gene08064.t1
LOC_Os01g22490.1	PH02Gene08062.t1
LOC_Os01g22500.1	PH02Gene08061.t1
LOC_Os01g22510.1	PH02Gene08060.t1
LOC_Os01g22520.1	PH02Gene08059.t1
LOC_Os01g22590.1	PH02Gene08052.t1
LOC_Os01g22600.1	PH02Gene08051.t1
LOC_Os01g22630.1	PH02Gene08049.t1
LOC_Os01g22640.1	PH02Gene08048.t1
LOC_Os01g22780.1	PH02Gene08047.t1
LOC_Os01g22870.1	PH02Gene08044.t1
LOC_Os01g22900.1	PH02Gene08042.t1
LOC_Os01g22910.1	PH02Gene45465.t1
LOC_Os01g22954.1	PH02Gene35461.t1
LOC_Os01g23070.1	PH02Gene46258.t1
LOC_Os01g31940.1	PH02Gene45379.t1
LOC_Os01g31980.1	PH02Gene32890.t1
LOC_Os01g32130.1	PH02Gene32887.t1
LOC_Os01g32184.1	PH02Gene22662.t1
LOC_Os01g32280.1	PH02Gene22658.t1
LOC_Os01g32300.1	PH02Gene22657.t1
LOC_Os01g32330.1	PH02Gene22655.t1
LOC_Os01g32350.1	PH02Gene22654.t1
LOC_Os01g32364.1	PH02Gene22653.t9
LOC_Os01g32460.1	PH02Gene22652.t1
LOC_Os01g32640.1	PH02Gene22646.t2
LOC_Os01g32660.1	PH02Gene22645.t1
LOC_Os01g32770.1	PH02Gene22644.t1
LOC_Os01g32780.1	PH02Gene22643.t1
LOC_Os01g32870.1	PH02Gene22642.t1
LOC_Os01g32880.1	PH02Gene38375.t1
LOC_Os01g32920.1	PH02Gene38376.t1
LOC_Os01g32964.1	PH02Gene38377.t1
LOC_Os01g32980.1	PH02Gene38378.t1
LOC_Os01g33000.1	PH02Gene38379.t1
LOC_Os01g33020.2	PH02Gene38380.t1
LOC_Os01g33040.1	PH02Gene38381.t1
LOC_Os01g33050.1	PH02Gene38382.t1
LOC_Os01g33070.1	PH02Gene44500.t1
LOC_Os01g33080.1	PH02Gene48020.t1
LOC_Os01g33090.1	PH02Gene48021.t1
LOC_Os01g33230.1	PH02Gene33322.t1
LOC_Os01g33300.1	PH02Gene33320.t1
LOC_Os01g33420.1	PH02Gene33312.t1
LOC_Os01g33490.1	PH02Gene41846.t1
LOC_Os01g33650.1	PH02Gene35788.t1
LOC_Os01g02680.1	PH02Gene19679.t1
LOC_Os01g02710.1	PH02Gene44067.t1
LOC_Os01g02750.1	PH02Gene44061.t1
LOC_Os01g02860.1	PH02Gene38566.t1
LOC_Os01g02870.1	PH02Gene38567.t1
LOC_Os01g02880.1	PH02Gene38568.t1
LOC_Os01g02884.1	PH02Gene38569.t1
LOC_Os01g02890.1	PH02Gene38570.t1
LOC_Os01g02900.1	PH02Gene47132.t1
LOC_Os01g02910.1	PH02Gene47133.t2
LOC_Os01g02940.1	PH02Gene42256.t1
LOC_Os01g03020.1	PH02Gene41151.t1
LOC_Os01g03030.1	PH02Gene41152.t1
LOC_Os01g03050.1	PH02Gene41153.t1
LOC_Os01g03070.1	PH02Gene41155.t1
LOC_Os01g03080.1	PH02Gene41156.t1
LOC_Os01g03090.1	PH02Gene41158.t1
LOC_Os01g03100.1	PH02Gene48708.t1
LOC_Os01g03180.1	PH02Gene20240.t1
LOC_Os01g03250.1	PH02Gene20239.t2
LOC_Os01g03490.1	PH02Gene20238.t1
LOC_Os01g03510.1	PH02Gene20237.t1
LOC_Os01g03520.1	PH02Gene20236.t1
LOC_Os01g03570.1	PH02Gene20232.t1
LOC_Os01g03620.1	PH02Gene20231.t1
LOC_Os01g03650.1	PH02Gene20230.t2
LOC_Os01g03660.2	PH02Gene20229.t1
LOC_Os01g03670.1	PH02Gene20228.t1
LOC_Os01g03680.1	PH02Gene20224.t1
LOC_Os01g03690.1	PH02Gene20222.t1
LOC_Os01g03720.1	PH02Gene20221.t1
LOC_Os01g03740.1	PH02Gene20219.t1
LOC_Os01g03750.1	PH02Gene20218.t1
LOC_Os01g03760.1	PH02Gene20217.t1
LOC_Os01g03820.1	PH02Gene20216.t1
LOC_Os01g03840.1	PH02Gene20215.t1
LOC_Os01g03870.1	PH02Gene20214.t1
LOC_Os01g03890.1	PH02Gene20213.t1
LOC_Os01g03914.1	PH02Gene20212.t1
LOC_Os01g03950.1	PH02Gene20211.t1
LOC_Os01g03980.1	PH02Gene20210.t1
LOC_Os01g04010.1	PH02Gene41093.t1
LOC_Os01g04020.1	PH02Gene41094.t1
LOC_Os01g04030.1	PH02Gene17022.t1
LOC_Os01g04070.1	PH02Gene17012.t1
LOC_Os01g04090.1	PH02Gene39486.t1
LOC_Os01g04100.1	PH02Gene39484.t1
LOC_Os01g04110.1	PH02Gene39483.t1
LOC_Os01g04160.1	PH02Gene39481.t1
LOC_Os01g04170.1	PH02Gene39480.t1
LOC_Os01g04190.3	PH02Gene39479.t1
LOC_Os01g04210.1	PH02Gene39478.t1
LOC_Os01g04230.1	PH02Gene39477.t1
LOC_Os01g04260.1	PH02Gene39476.t1
LOC_Os01g04280.1	PH02Gene39475.t1
LOC_Os01g04290.1	PH02Gene22226.t1
LOC_Os01g04330.1	PH02Gene22224.t1
LOC_Os01g04340.1	PH02Gene22220.t1
LOC_Os01g04390.1	PH02Gene22219.t1
LOC_Os01g04470.1	PH02Gene22216.t1
LOC_Os01g04540.1	PH02Gene22211.t1
LOC_Os01g04560.1	PH02Gene22203.t1
LOC_Os01g04570.1	PH02Gene22199.t1
LOC_Os01g04620.1	PH02Gene22198.t1
LOC_Os01g04630.1	PH02Gene22197.t1
LOC_Os01g04650.1	PH02Gene22196.t1
LOC_Os01g04660.1	PH02Gene22195.t1
LOC_Os01g04710.1	PH02Gene22193.t1
LOC_Os01g04720.1	PH02Gene22192.t1
LOC_Os01g04750.1	PH02Gene22188.t1
LOC_Os01g04814.1	PH02Gene22187.t1
LOC_Os01g04860.1	PH02Gene26373.t1
LOC_Os01g04870.1	PH02Gene26372.t1
LOC_Os01g04880.1	PH02Gene26369.t1
LOC_Os01g04900.2	PH02Gene26368.t1
LOC_Os01g04910.1	PH02Gene26367.t1
LOC_Os01g04920.2	PH02Gene26366.t1
LOC_Os01g04930.1	PH02Gene26363.t1
LOC_Os01g04950.3	PH02Gene26362.t1
LOC_Os01g04990.1	PH02Gene28735.t1
LOC_Os01g05010.1	PH02Gene28738.t1
LOC_Os01g05070.1	PH02Gene28739.t1
LOC_Os01g05090.1	PH02Gene28746.t1
LOC_Os01g05100.1	PH02Gene28747.t1
LOC_Os01g05120.1	PH02Gene28749.t1
LOC_Os01g05130.1	PH02Gene28750.t1
LOC_Os01g05140.1	PH02Gene28751.t1
LOC_Os01g05150.1	PH02Gene28752.t1
LOC_Os01g05420.1	PH02Gene28758.t1
LOC_Os01g05460.1	PH02Gene28760.t1
LOC_Os01g05480.1	PH02Gene28762.t1
LOC_Os01g05490.1	PH02Gene28763.t1
LOC_Os01g05500.1	PH02Gene28764.t1
LOC_Os01g05600.1	PH02Gene28765.t1
LOC_Os01g05660.1	PH02Gene28768.t1
LOC_Os01g05670.1	PH02Gene28769.t1
LOC_Os01g05680.1	PH02Gene28770.t1
LOC_Os01g05694.1	PH02Gene28772.t1
LOC_Os01g05790.1	PH02Gene28773.t1
LOC_Os01g05800.1	PH02Gene28774.t1
LOC_Os01g05810.1	PH02Gene48540.t2
LOC_Os01g05840.2	PH02Gene42272.t1
LOC_Os01g05850.1	PH02Gene42273.t1
LOC_Os01g05860.1	PH02Gene42274.t1
LOC_Os01g05870.1	PH02Gene44361.t1
LOC_Os01g06000.1	PH02Gene44358.t1
LOC_Os01g06020.1	PH02Gene44356.t1
LOC_Os01g06030.1	PH02Gene44354.t1
LOC_Os01g06230.1	PH02Gene44353.t1
LOC_Os01g06250.1	PH02Gene44352.t1
LOC_Os01g06280.2	PH02Gene44349.t1
LOC_Os01g06290.2	PH02Gene44348.t2
LOC_Os01g06310.1	PH02Gene44347.t1
LOC_Os01g06320.1	PH02Gene44346.t1
LOC_Os01g06360.1	PH02Gene44344.t1
LOC_Os01g06400.1	PH02Gene39878.t1
LOC_Os01g06454.1	PH02Gene39877.t1
LOC_Os01g06460.1	PH02Gene39875.t1
LOC_Os01g06470.1	PH02Gene39874.t1
LOC_Os01g06490.1	PH02Gene39871.t1
LOC_Os01g06500.1	PH02Gene39869.t1
LOC_Os01g06560.1	PH02Gene39868.t1
LOC_Os01g06580.1	PH02Gene39867.t1
LOC_Os01g06590.1	PH02Gene39866.t1
LOC_Os01g06630.1	PH02Gene39865.t1
LOC_Os01g06640.1	PH02Gene39864.t1
LOC_Os01g06720.1	PH02Gene39861.t1
LOC_Os01g06800.1	PH02Gene39860.t1
LOC_Os01g06940.1	PH02Gene39369.t1
LOC_Os01g07070.1	PH02Gene39370.t1
LOC_Os01g07080.1	PH02Gene39371.t1
LOC_Os01g07090.1	PH02Gene39372.t1
LOC_Os01g07100.1	PH02Gene39373.t3
LOC_Os01g07110.1	PH02Gene39375.t1
LOC_Os01g07120.2	PH02Gene39376.t2
LOC_Os01g07130.1	PH02Gene39377.t1
LOC_Os01g07140.1	PH02Gene39378.t1
LOC_Os01g07150.1	PH02Gene39379.t1
LOC_Os01g07200.1	PH02Gene39382.t1
LOC_Os01g07212.1	PH02Gene39383.t1
LOC_Os01g07240.1	PH02Gene39384.t1
LOC_Os01g07250.1	PH02Gene39385.t1
LOC_Os01g07260.1	PH02Gene39387.t1
LOC_Os01g07310.1	PH02Gene39388.t1
LOC_Os01g07330.3	PH02Gene39390.t1
LOC_Os01g07340.1	PH02Gene39391.t1
LOC_Os01g07350.1	PH02Gene39392.t1
LOC_Os01g07360.1	PH02Gene39395.t1
LOC_Os01g07376.1	PH02Gene10676.t1
LOC_Os01g07382.1	PH02Gene10675.t1
LOC_Os01g07390.1	PH02Gene10671.t1
LOC_Os01g07400.1	PH02Gene10670.t1
LOC_Os01g07410.1	PH02Gene10669.t1
LOC_Os01g07430.1	PH02Gene10668.t1
LOC_Os01g07450.1	PH02Gene10667.t1
LOC_Os01g07480.1	PH02Gene49769.t1
LOC_Os01g07490.1	PH02Gene10664.t1
LOC_Os01g07500.1	PH02Gene10663.t1
LOC_Os01g07520.1	PH02Gene10662.t1
LOC_Os01g07530.1	PH02Gene10661.t1
LOC_Os01g07540.1	PH02Gene10660.t1
LOC_Os01g07560.1	PH02Gene10659.t1
LOC_Os01g07570.1	PH02Gene10658.t2
LOC_Os01g07590.1	PH02Gene10655.t1
LOC_Os01g07610.1	PH02Gene10654.t1
LOC_Os01g07630.1	PH02Gene10652.t1
LOC_Os01g07700.1	PH02Gene10651.t1
LOC_Os01g07740.1	PH02Gene10650.t1
LOC_Os01g07750.1	PH02Gene10649.t1
LOC_Os01g07760.1	PH02Gene10648.t1
LOC_Os01g07770.1	PH02Gene10647.t1
LOC_Os01g07780.1	PH02Gene10646.t1
LOC_Os01g07800.1	PH02Gene10645.t1
LOC_Os01g07810.1	PH02Gene10644.t1
LOC_Os01g07850.1	PH02Gene10642.t1
LOC_Os01g07870.1	PH02Gene10640.t1
LOC_Os01g07880.1	PH02Gene10639.t1
LOC_Os01g07890.1	PH02Gene10638.t1
LOC_Os01g07910.1	PH02Gene10637.t2
LOC_Os01g07920.1	PH02Gene10636.t2
LOC_Os01g07930.1	PH02Gene10635.t1
LOC_Os01g07940.1	PH02Gene10634.t1
LOC_Os01g07950.1	PH02Gene10633.t1
LOC_Os01g07960.1	PH02Gene10632.t1
LOC_Os01g07980.1	PH02Gene48275.t1
LOC_Os01g08020.1	PH02Gene45069.t1
LOC_Os01g08090.1	PH02Gene45071.t1
LOC_Os01g08120.1	PH02Gene45072.t1
LOC_Os01g08130.1	PH02Gene45074.t1
LOC_Os01g08150.1	PH02Gene45075.t1
LOC_Os01g08160.1	PH02Gene45076.t1
LOC_Os01g08170.1	PH02Gene45077.t1
LOC_Os01g08180.1	PH02Gene45078.t1
LOC_Os01g08190.2	PH02Gene43668.t1
LOC_Os01g08200.1	PH02Gene43669.t1
LOC_Os01g08220.1	PH02Gene43670.t1
LOC_Os01g08260.1	PH02Gene43671.t1
LOC_Os01g08270.1	PH02Gene43672.t1
LOC_Os01g08310.1	PH02Gene50650.t1
LOC_Os01g08320.1	PH02Gene50651.t1
LOC_Os01g08340.1	PH02Gene29645.t1
LOC_Os01g08380.1	PH02Gene29641.t1
LOC_Os01g08400.1	PH02Gene29640.t3
LOC_Os01g08410.1	PH02Gene29639.t1
LOC_Os01g08420.1	PH02Gene29638.t1
LOC_Os01g08430.1	PH02Gene29636.t1
LOC_Os01g08440.1	PH02Gene29633.t1
LOC_Os01g08460.1	PH02Gene29632.t2
LOC_Os01g08470.1	PH02Gene29631.t1
LOC_Os01g08510.1	PH02Gene29630.t1
LOC_Os01g08520.1	PH02Gene29629.t1
LOC_Os01g08540.1	PH02Gene29628.t1
LOC_Os01g08550.1	PH02Gene29627.t1
LOC_Os01g08570.1	PH02Gene29626.t1
LOC_Os01g08580.1	PH02Gene29625.t1
LOC_Os01g08670.1	PH02Gene29624.t1
LOC_Os01g08700.1	PH02Gene29623.t1
LOC_Os01g08710.1	PH02Gene29622.t1
LOC_Os01g08750.1	PH02Gene29621.t1
LOC_Os01g08780.1	PH02Gene29620.t1
LOC_Os01g08800.1	PH02Gene29619.t1
LOC_Os01g08814.1	PH02Gene06260.t1
LOC_Os01g08820.1	PH02Gene06261.t1
LOC_Os01g08830.1	PH02Gene06262.t1
LOC_Os01g08840.1	PH02Gene06264.t1
LOC_Os01g08850.1	PH02Gene06265.t1
LOC_Os01g08860.1	PH02Gene06266.t1
LOC_Os01g08960.1	PH02Gene06267.t1
LOC_Os01g08970.1	PH02Gene06268.t1
LOC_Os01g08990.1	PH02Gene06270.t1
LOC_Os01g09000.1	PH02Gene06271.t1
LOC_Os01g09010.1	PH02Gene06272.t1
LOC_Os01g09020.1	PH02Gene06273.t1
LOC_Os01g09030.1	PH02Gene06274.t1
LOC_Os01g09080.1	PH02Gene06275.t1
LOC_Os01g09100.1	PH02Gene06276.t1
LOC_Os01g09120.1	PH02Gene06277.t2
LOC_Os01g09200.1	PH02Gene06278.t1
LOC_Os01g09220.1	PH02Gene06279.t1
LOC_Os01g09246.1	PH02Gene06281.t1
LOC_Os01g09260.1	PH02Gene06282.t1
LOC_Os01g09300.1	PH02Gene06286.t1
LOC_Os01g09320.1	PH02Gene06287.t1
LOC_Os01g09450.1	PH02Gene06288.t3
LOC_Os01g09460.1	PH02Gene06290.t1
LOC_Os01g09470.1	PH02Gene06291.t1
LOC_Os01g09550.1	PH02Gene06293.t2
LOC_Os01g09560.1	PH02Gene06294.t1
LOC_Os01g09570.1	PH02Gene06295.t3
LOC_Os01g09580.2	PH02Gene06296.t1
LOC_Os01g09590.1	PH02Gene06297.t1
LOC_Os01g09640.1	PH02Gene06298.t1
LOC_Os01g09670.1	PH02Gene06302.t1
LOC_Os01g09700.1	PH02Gene06303.t1
LOC_Os01g09720.1	PH02Gene06304.t1
LOC_Os01g09730.1	PH02Gene06305.t1
LOC_Os01g09740.1	PH02Gene06306.t1
LOC_Os01g09750.1	PH02Gene06307.t1
LOC_Os01g09760.1	PH02Gene06308.t1
LOC_Os01g09770.1	PH02Gene06309.t1
LOC_Os01g09790.1	PH02Gene06310.t1
LOC_Os01g09800.1	PH02Gene06312.t1
LOC_Os01g09830.1	PH02Gene06313.t1
LOC_Os01g09850.1	PH02Gene06314.t1
LOC_Os01g09860.1	PH02Gene06315.t2
LOC_Os01g09880.1	PH02Gene06318.t1
LOC_Os01g09890.1	PH02Gene06322.t2
LOC_Os01g09900.1	PH02Gene06323.t1
LOC_Os01g10010.1	PH02Gene06325.t1
LOC_Os01g10020.1	PH02Gene06326.t1
LOC_Os01g10040.1	PH02Gene06327.t2
LOC_Os01g10050.2	PH02Gene06328.t1
LOC_Os01g10070.1	PH02Gene06329.t1
LOC_Os01g10090.1	PH02Gene06331.t1
LOC_Os01g10100.2	PH02Gene06332.t1
LOC_Os01g10110.1	PH02Gene06333.t1
LOC_Os01g10130.1	PH02Gene34808.t1
LOC_Os01g10150.1	PH02Gene34810.t1
LOC_Os01g10180.1	PH02Gene34812.t1
LOC_Os01g10210.1	PH02Gene34813.t1
LOC_Os01g10250.1	PH02Gene34814.t1
LOC_Os01g10260.1	PH02Gene34815.t1
LOC_Os01g10280.1	PH02Gene34816.t1
LOC_Os01g10310.1	PH02Gene34817.t1
LOC_Os01g10320.1	PH02Gene34818.t3
LOC_Os01g10350.1	PH02Gene34819.t1
LOC_Os01g10370.1	PH02Gene34820.t1
LOC_Os01g10430.1	PH02Gene39496.t1
LOC_Os01g10440.1	PH02Gene39494.t1
LOC_Os01g10450.1	PH02Gene39493.t1
LOC_Os01g10470.1	PH02Gene39491.t1
LOC_Os01g10490.1	PH02Gene39490.t2
LOC_Os01g10504.2	PH02Gene39489.t3
LOC_Os01g10520.1	PH02Gene39488.t1
LOC_Os01g10580.1	PH02Gene32457.t1
LOC_Os01g10600.1	PH02Gene32453.t1
LOC_Os01g10610.1	PH02Gene32452.t1
LOC_Os01g10630.1	PH02Gene32450.t1
LOC_Os01g10680.1	PH02Gene32449.t1
LOC_Os01g10690.1	PH02Gene32448.t3
LOC_Os01g10700.1	PH02Gene32444.t1
LOC_Os01g10790.1	PH02Gene32443.t1
LOC_Os01g10810.1	PH02Gene32442.t1
LOC_Os01g10820.1	PH02Gene32441.t1
LOC_Os01g10830.1	PH02Gene32439.t1
LOC_Os01g10840.1	PH02Gene32438.t1
LOC_Os01g10850.1	PH02Gene32437.t1
LOC_Os01g10870.1	PH02Gene32435.t1
LOC_Os01g10880.1	PH02Gene32434.t1
LOC_Os01g10890.1	PH02Gene32433.t1
LOC_Os01g10900.1	PH02Gene32431.t1
LOC_Os01g10920.1	PH02Gene31992.t1
LOC_Os01g11040.1	PH02Gene31991.t2
LOC_Os01g11054.1	PH02Gene31990.t1
LOC_Os01g11070.1	PH02Gene31989.t1
LOC_Os01g11110.2	PH02Gene31988.t1
LOC_Os01g11120.1	PH02Gene31987.t1
LOC_Os01g11130.1	PH02Gene31986.t1
LOC_Os01g11150.1	PH02Gene31982.t1
LOC_Os01g11160.1	PH02Gene31981.t1
LOC_Os01g11210.1	PH02Gene31980.t1
LOC_Os01g11220.1	PH02Gene31979.t1
LOC_Os01g11230.1	PH02Gene31978.t1
LOC_Os01g11240.1	PH02Gene31977.t1
LOC_Os01g11260.1	PH02Gene31976.t1
LOC_Os01g11270.1	PH02Gene31973.t1
LOC_Os01g11350.1	PH02Gene31972.t2
LOC_Os01g11370.1	PH02Gene31970.t1
LOC_Os01g11414.1	PH02Gene31969.t1
LOC_Os01g11430.1	PH02Gene31968.t1
LOC_Os01g11490.1	PH02Gene21852.t1
LOC_Os01g11550.1	PH02Gene21850.t1
LOC_Os01g11580.1	PH02Gene21849.t3
LOC_Os01g11590.2	PH02Gene21848.t1
LOC_Os01g11600.1	PH02Gene21847.t1
LOC_Os01g11650.1	PH02Gene21843.t1
LOC_Os01g11710.1	PH02Gene21842.t1
LOC_Os01g11810.1	PH02Gene21839.t1
LOC_Os01g11840.1	PH02Gene21838.t1
LOC_Os01g11850.1	PH02Gene21837.t1
LOC_Os01g11860.1	PH02Gene21835.t1
LOC_Os01g11920.1	PH02Gene21834.t1
LOC_Os01g11940.1	PH02Gene21833.t1
LOC_Os01g11946.1	PH02Gene21832.t1
LOC_Os01g11952.1	PH02Gene21831.t1
LOC_Os01g11970.1	PH02Gene21830.t1
LOC_Os01g11980.1	PH02Gene21828.t1
LOC_Os01g11990.1	PH02Gene21827.t1
LOC_Os01g12000.1	PH02Gene21826.t1
LOC_Os01g12030.1	PH02Gene21824.t1
LOC_Os01g12080.1	PH02Gene21823.t1
LOC_Os01g12090.1	PH02Gene21821.t1
LOC_Os01g12110.1	PH02Gene21819.t1
LOC_Os01g12130.1	PH02Gene21818.t1
LOC_Os01g12160.1	PH02Gene21815.t1
LOC_Os01g12200.1	PH02Gene39707.t1
LOC_Os01g12210.1	PH02Gene39708.t1
LOC_Os01g12220.1	PH02Gene39709.t1
LOC_Os01g12230.1	PH02Gene39710.t1
LOC_Os01g12250.1	PH02Gene39711.t1
LOC_Os01g12260.1	PH02Gene39712.t1
LOC_Os01g12280.1	PH02Gene39713.t1
LOC_Os01g12304.1	PH02Gene39533.t1
LOC_Os01g12390.1	PH02Gene39532.t1
LOC_Os01g12400.2	PH02Gene39529.t1
LOC_Os01g12440.1	PH02Gene39528.t1
LOC_Os01g12460.1	PH02Gene50407.t1
LOC_Os01g12470.1	PH02Gene10885.t1
LOC_Os01g12480.1	PH02Gene10884.t1
LOC_Os01g12490.1	PH02Gene10883.t1
LOC_Os01g12520.1	PH02Gene10880.t1
LOC_Os01g12530.1	PH02Gene10879.t1
LOC_Os01g12560.1	PH02Gene10878.t2
LOC_Os01g12580.1	PH02Gene10877.t1
LOC_Os01g12640.2	PH02Gene10876.t1
LOC_Os01g12650.1	PH02Gene10873.t1
LOC_Os01g12660.1	PH02Gene10872.t1
LOC_Os01g12670.1	PH02Gene10870.t1
LOC_Os01g12680.4	PH02Gene10869.t1
LOC_Os01g12690.1	PH02Gene10868.t1
LOC_Os01g12710.1	PH02Gene10867.t1
LOC_Os01g12720.1	PH02Gene10866.t2
LOC_Os01g12730.1	PH02Gene10865.t1
LOC_Os01g12740.1	PH02Gene10861.t1
LOC_Os01g01010.1	PH02Gene47512.t1
LOC_Os01g01030.1	PH02Gene47510.t1
LOC_Os01g01040.1	PH02Gene47509.t1
LOC_Os01g01050.1	PH02Gene47508.t1
LOC_Os01g01070.1	PH02Gene44597.t1
LOC_Os01g01080.1	PH02Gene44596.t1
LOC_Os01g01115.1	PH02Gene44595.t1
LOC_Os01g01130.1	PH02Gene44591.t1
LOC_Os01g01150.1	PH02Gene44590.t1
LOC_Os01g01160.1	PH02Gene44589.t1
LOC_Os01g01170.1	PH02Gene44588.t1
LOC_Os01g01180.1	PH02Gene44587.t1
LOC_Os01g01190.1	PH02Gene44586.t3
LOC_Os01g01295.1	PH02Gene44584.t1
LOC_Os01g01307.1	PH02Gene44583.t1
LOC_Os01g01340.1	PH02Gene19629.t1
LOC_Os01g01360.1	PH02Gene19630.t1
LOC_Os01g01430.1	PH02Gene19631.t1
LOC_Os01g01470.1	PH02Gene19632.t1
LOC_Os01g01520.1	PH02Gene19633.t1
LOC_Os01g01600.1	PH02Gene19634.t1
LOC_Os01g01610.1	PH02Gene19635.t1
LOC_Os01g01620.1	PH02Gene19636.t1
LOC_Os01g01640.1	PH02Gene19637.t1
LOC_Os01g01650.1	PH02Gene19639.t1
LOC_Os01g01680.1	PH02Gene19640.t1
LOC_Os01g01689.1	PH02Gene19644.t1
LOC_Os01g01700.1	PH02Gene19645.t1
LOC_Os01g01710.1	PH02Gene19646.t1
LOC_Os01g01720.1	PH02Gene19647.t1
LOC_Os01g01740.1	PH02Gene19648.t1
LOC_Os01g01770.1	PH02Gene19649.t1
LOC_Os01g01790.1	PH02Gene19650.t1
LOC_Os01g01840.1	PH02Gene19652.t1
LOC_Os01g01890.1	PH02Gene19653.t1
LOC_Os01g01920.1	PH02Gene19654.t2
LOC_Os01g01960.1	PH02Gene19656.t2
LOC_Os01g01970.1	PH02Gene19657.t1
LOC_Os01g02000.1	PH02Gene19658.t1
LOC_Os01g02020.1	PH02Gene19660.t1
LOC_Os01g02040.1	PH02Gene19661.t1
LOC_Os01g02050.1	PH02Gene19663.t2
LOC_Os01g02060.1	PH02Gene19664.t1
LOC_Os01g02080.1	PH02Gene19665.t1
LOC_Os01g02090.1	PH02Gene19666.t1
LOC_Os01g02100.1	PH02Gene19668.t1
LOC_Os01g02110.1	PH02Gene19669.t1
LOC_Os01g02120.1	PH02Gene19671.t1
LOC_Os01g02139.1	PH02Gene19673.t1
LOC_Os01g02170.2	PH02Gene19674.t1
LOC_Os01g02200.1	PH02Gene19675.t1
LOC_Os01g02290.1	PH02Gene19677.t1
LOC_Os01g02300.1	PH02Gene44060.t1
LOC_Os01g02370.1	PH02Gene38565.t1
LOC_Os01g02550.1	PH02Gene42253.t2
LOC_Os01g02560.1	PH02Gene42252.t1
LOC_Os01g13160.1	PH02Gene10828.t1
LOC_Os01g13180.1	PH02Gene10825.t1
LOC_Os01g13200.1	PH02Gene10824.t1
LOC_Os01g13210.1	PH02Gene10823.t1
LOC_Os01g13229.1	PH02Gene10822.t1
LOC_Os01g13280.1	PH02Gene10821.t1
LOC_Os01g13300.1	PH02Gene10820.t1
LOC_Os01g13320.1	PH02Gene10819.t1
LOC_Os01g13330.1	PH02Gene10818.t1
LOC_Os01g13340.1	PH02Gene10816.t1
LOC_Os01g13360.1	PH02Gene10814.t1
LOC_Os01g13370.1	PH02Gene10813.t1
LOC_Os01g13404.1	PH02Gene23852.t1
LOC_Os01g13430.1	PH02Gene23851.t1
LOC_Os01g13460.1	PH02Gene23850.t1
LOC_Os01g13470.1	PH02Gene23849.t1
LOC_Os01g13480.1	PH02Gene23848.t1
LOC_Os01g13520.1	PH02Gene23847.t2
LOC_Os01g13530.1	PH02Gene46789.t2
LOC_Os01g13540.1	PH02Gene46788.t1
LOC_Os01g13550.1	PH02Gene46787.t4
LOC_Os01g13560.1	PH02Gene46786.t1
LOC_Os01g13570.1	PH02Gene46785.t1
LOC_Os01g13590.1	PH02Gene46784.t1
LOC_Os01g13690.2	PH02Gene38996.t1
LOC_Os01g13700.1	PH02Gene38997.t1
LOC_Os01g13710.1	PH02Gene38998.t1
LOC_Os01g13720.4	PH02Gene38999.t1
LOC_Os01g13730.1	PH02Gene39000.t1
LOC_Os01g13740.1	PH02Gene39001.t1
LOC_Os01g13760.1	PH02Gene39002.t1
LOC_Os01g13770.1	PH02Gene39003.t1
LOC_Os01g13800.1	PH02Gene39004.t1
LOC_Os01g13810.1	PH02Gene39005.t1
LOC_Os01g13930.1	PH02Gene39006.t1
LOC_Os01g13940.1	PH02Gene39007.t1
LOC_Os01g49320.1	PH02Gene40516.t1
LOC_Os01g49330.1	PH02Gene40517.t2
LOC_Os01g49350.1	PH02Gene40518.t1
LOC_Os01g49380.1	PH02Gene40519.t1
LOC_Os01g49390.1	PH02Gene40520.t1
LOC_Os01g49410.1	PH02Gene40523.t1
LOC_Os01g49470.1	PH02Gene40525.t1
LOC_Os01g49490.1	PH02Gene40526.t1
LOC_Os01g49510.1	PH02Gene40527.t1
LOC_Os01g49529.3	PH02Gene40528.t3
LOC_Os01g49580.1	PH02Gene42879.t1
LOC_Os01g49660.1	PH02Gene07926.t1
LOC_Os01g49680.1	PH02Gene45296.t1
LOC_Os01g49690.1	PH02Gene45297.t1
[truncated: 28,924 more rows]

## Sheet: Table S5
Table S5 Promoter cis-element analysis of the PUB genes from Phyllostachys edulis
Gene name	Site Name	sequence	Position	Position	Strand	Organism	Function
PH02Gene00170.t1	ABRE	CGTACGTGCA	412	9	+	Hordeum vulgare	hormone responsive
PH02Gene00170.t1	ABRE	ACGTG	1290	5	+	Arabidopsis thaliana	hormone responsive
PH02Gene00170.t1	TGA-element	AACGAC	725	6	-	Brassica oleracea	hormone responsive
PH02Gene00170.t1	TCA-element	CCATCTTTTT	1068	9	-	Nicotiana tabacum	hormone responsive
PH02Gene00170.t1	CGTCA-motif	CGTCA	741	5	-	Hordeum vulgare	hormone responsive
PH02Gene00170.t1	CGTCA-motif	CGTCA	1196	5	-	Hordeum vulgare	hormone responsive
PH02Gene00170.t1	CGTCA-motif	CGTCA	1288	5	-	Hordeum vulgare	hormone responsive
PH02Gene00170.t1	CGTCA-motif	CGTCA	1520	5	-	Hordeum vulgare	hormone responsive
PH02Gene00170.t1	TGACG-motif	TGACG	741	5	+	Hordeum vulgare	hormone responsive
PH02Gene00170.t1	TGACG-motif	TGACG	1196	5	+	Hordeum vulgare	hormone responsive
PH02Gene00170.t1	TGACG-motif	TGACG	1288	5	+	Hordeum vulgare	hormone responsive
PH02Gene00170.t1	TGACG-motif	TGACG	1520	5	+	Hordeum vulgare	hormone responsive
PH02Gene00170.t1	P-box	CCTTTTG	213	7	-	Oryza sativa	hormone responsive
PH02Gene00170.t1	ERE	ATTTTAAA	321	8	+	Nicotiana glutinos	hormone responsive
PH02Gene00170.t1	CAAT-box	CAAAT	193	5	+	Pisum sativum	light responsive
PH02Gene00170.t1	CAAT-box	CAAAT	292	5	+	Pisum sativum	light responsive
PH02Gene00170.t1	CAAT-box	TGCCAAC	583	7	-	Petunia hybrida	light responsive
PH02Gene00170.t1	CAAT-box	CCAAT	818	5	-	Arabidopsis thaliana	light responsive
PH02Gene00170.t1	CAAT-box	CCAAT	828	5	-	Arabidopsis thaliana	light responsive
PH02Gene00170.t1	CAAT-box	CAAAT	985	5	-	Pisum sativum	light responsive
PH02Gene00170.t1	CAAT-box	CAAAT	1052	5	-	Pisum sativum	light responsive
PH02Gene00170.t1	CAAT-box	CAAAT	1129	5	-	Pisum sativum	light responsive
PH02Gene00170.t1	CAAT-box	CAAAT	1152	5	+	Pisum sativum	light responsive
PH02Gene00170.t1	CAAT-box	CAAAT	1193	5	-	Pisum sativum	light responsive
PH02Gene00170.t1	CAAT-box	CAAAT	1230	5	+	Pisum sativum	light responsive
PH02Gene00170.t1	CAAT-box	CAAAT	1233	5	-	Pisum sativum	light responsive
PH02Gene00170.t1	CAAT-box	CAAAT	1905	5	+	Pisum sativum	light responsive
PH02Gene00170.t1	AT1-motif	AATTATTTTTTATT	807	13	-	Solanum tuberosum	light responsive
PH02Gene00170.t1	Box 4	ATTAAT	1095	6	-	Petroselinum crispum	light responsive
PH02Gene00170.t1	Box 4	ATTAAT	1189	6	-	Petroselinum crispum	light responsive
PH02Gene00170.t1	G-box	CACGAC	25	6	+	Zea mays	light responsive
PH02Gene00170.t1	G-box	CACGAC	498	6	-	Zea mays	light responsive
PH02Gene00170.t1	G-box	CACGTC	1289	6	-	Zea mays	light responsive
PH02Gene00170.t1	GT1-motif	GGTTAA	979	6	+	Arabidopsis thaliana	light responsive
PH02Gene00170.t1	GTGGC-motif	GATTCTGTGGC	1480	10	-	Spinacia oleracea	light responsive
PH02Gene00170.t1	Sp1	GGGCGG	1666	6	-	Oryza sativa	light responsive
PH02Gene00170.t1	AE-box	AGAAACAA	1267	8	-	Arabidopsis thaliana	light responsive
PH02Gene00170.t1	CCAAT-box	CAACGG	581	6	-	Hordeum vulgare	MYBHv1 binding site
PH02Gene00170.t1	A-box	CCGTCC	1598	6	+	Petroselinum crispum	plant growth and development
PH02Gene00170.t1	RY-element	CATGCATG	588	8	+	Helianthus annuus	plant growth and development
PH02Gene00170.t1	CAT-box	GCCACT	1827	6	-	Arabidopsis thaliana	plant growth and development
PH02Gene00170.t1	GCN4_motif	TGAGTCA	1543	7	+	Oryza sativa	plant growth and development
PH02Gene00170.t1	TC-rich repeats	ATTCTCTAAC	1250	9	+	Nicotiana tabacum	stress responsive
PH02Gene00263.t1	AT-rich element	ATAGAAATCAA	305	10	-	Glycine max	binding site of AT-rich DNA binding protein (ATBP-1)
PH02Gene00263.t1	TATC-box	TATCCCA	716	7	-	Oryza sativa	hormone responsive
PH02Gene00263.t1	TCA-element	CCATCTTTTT	93	9	-	Nicotiana tabacum	hormone responsive
PH02Gene00263.t1	ABRE	ACGTG	1779	5	-	Arabidopsis thaliana	hormone responsive
PH02Gene00263.t1	CGTCA-motif	CGTCA	849	5	-	Hordeum vulgare	hormone responsive
PH02Gene00263.t1	CGTCA-motif	CGTCA	1941	5	+	Hordeum vulgare	hormone responsive
PH02Gene00263.t1	TGACG-motif	TGACG	849	5	+	Hordeum vulgare	hormone responsive
PH02Gene00263.t1	TGACG-motif	TGACG	1941	5	-	Hordeum vulgare	hormone responsive
PH02Gene00263.t1	GARE-motif	TCTGTTG	1045	7	+	Brassica oleracea	hormone responsive
PH02Gene00263.t1	ERE	ATTTCATA	1210	8	-	Nicotiana glutinos	hormone responsive
PH02Gene00263.t1	ERE	ATTTTAAA	1593	8	-	Nicotiana glutinos	hormone responsive
PH02Gene00263.t1	CAAT-box	CCAAT	264	5	+	Arabidopsis thaliana	light responsive
PH02Gene00263.t1	CAAT-box	CCAAT	296	5	-	Arabidopsis thaliana	light responsive
PH02Gene00263.t1	CAAT-box	CAAAT	303	5	-	Pisum sativum	light responsive
PH02Gene00263.t1	CAAT-box	CAAAT	411	5	-	Pisum sativum	light responsive
PH02Gene00263.t1	CAAT-box	CCAAT	463	5	-	Arabidopsis thaliana	light responsive
PH02Gene00263.t1	CAAT-box	CAAAT	648	5	+	Pisum sativum	light responsive
PH02Gene00263.t1	CAAT-box	CAAAT	682	5	-	Pisum sativum	light responsive
PH02Gene00263.t1	CAAT-box	CCAAT	714	5	-	Arabidopsis thaliana	light responsive
PH02Gene00263.t1	CAAT-box	CAAAT	788	5	+	Pisum sativum	light responsive
PH02Gene00263.t1	CAAT-box	CCAAT	878	5	+	Arabidopsis thaliana	light responsive
PH02Gene00263.t1	CAAT-box	CAAAT	895	5	+	Pisum sativum	light responsive
PH02Gene00263.t1	CAAT-box	CCAAT	1101	5	-	Arabidopsis thaliana	light responsive
PH02Gene00263.t1	CAAT-box	CCAAT	1637	5	-	Arabidopsis thaliana	light responsive
PH02Gene00263.t1	ATCT-motif	AATCTAATCC	226	9	-	Pisum sativum	light responsive
PH02Gene00263.t1	Box 4	ATTAAT	1443	6	-	Petroselinum crispum	light responsive
PH02Gene00263.t1	Box 4	ATTAAT	1629	6	-	Petroselinum crispum	light responsive
PH02Gene00263.t1	Box 4	ATTAAT	1633	6	-	Petroselinum crispum	light responsive
PH02Gene00263.t1	GA-motif	ATAGATAA	1309	8	+	Arabidopsis thaliana	light responsive
PH02Gene00263.t1	GATA-motif	AAGGATAAGG	394	9	+	Solanum tuberosum	light responsive
PH02Gene00263.t1	G-box	CACGTC	1779	6	+	Zea mays	light responsive
PH02Gene00263.t1	G-box	CACGAC	1956	6	+	Zea mays	light responsive
PH02Gene00263.t1	GT1-motif	GGTTAA	443	6	+	Arabidopsis thaliana	light responsive
PH02Gene00263.t1	I-box	AGATAAGG	396	8	+	Triticum aestivum	light responsive
PH02Gene00263.t1	LAMP-element	CTTTATCA	390	8	-	Pisum sativum	light responsive
PH02Gene00263.t1	TCT-motif	TCTTAC	1155	6	-	Arabidopsis thaliana	light responsive
PH02Gene00263.t1	AE-box	AGAAACAA	839	8	+	Arabidopsis thaliana	light responsive
PH02Gene00263.t1	plant_AP-2-like	CGACCAGG	1707	8	+	Oryza sativa	plant growth and development
PH02Gene00263.t1	WUN-motif	CCATTTCAA	1328	9	-	Nicotiana glutinosa	stess responsive
PH02Gene00263.t1	LTR	CCGAAA	439	6	-	Hordeum vulgare	stress responsive
PH02Gene00263.t1	ARE	AAACCA	11	6	-	Zea mays	stress responsive
PH02Gene00659.t1	TGA-element	AACGAC	339	6	-	Brassica oleracea	hormone responsive
PH02Gene00659.t1	CGTCA-motif	CGTCA	41	5	-	Hordeum vulgare	hormone responsive
PH02Gene00659.t1	CGTCA-motif	CGTCA	251	5	-	Hordeum vulgare	hormone responsive
PH02Gene00659.t1	CGTCA-motif	CGTCA	581	5	+	Hordeum vulgare	hormone responsive
PH02Gene00659.t1	TGACG-motif	TGACG	41	5	+	Hordeum vulgare	hormone responsive
PH02Gene00659.t1	TGACG-motif	TGACG	251	5	+	Hordeum vulgare	hormone responsive
PH02Gene00659.t1	TGACG-motif	TGACG	581	5	-	Hordeum vulgare	hormone responsive
PH02Gene00659.t1	P-box	CCTTTTG	1100	7	+	Oryza sativa	hormone responsive
PH02Gene00659.t1	P-box	CCTTTTG	1793	7	+	Oryza sativa	hormone responsive
PH02Gene00659.t1	CAAT-box	CAAAT	62	5	+	Pisum sativum	light responsive
PH02Gene00659.t1	CAAT-box	CAAAT	173	5	-	Pisum sativum	light responsive
PH02Gene00659.t1	CAAT-box	CAAAT	280	5	-	Pisum sativum	light responsive
PH02Gene00659.t1	CAAT-box	CAAAT	568	5	-	Pisum sativum	light responsive
PH02Gene00659.t1	CAAT-box	CAAAT	1418	5	-	Pisum sativum	light responsive
PH02Gene00659.t1	CAAT-box	CAAAT	1436	5	+	Pisum sativum	light responsive
PH02Gene00659.t1	CAAT-box	CAAAT	1612	5	-	Pisum sativum	light responsive
PH02Gene00659.t1	Box 4	ATTAAT	1404	6	-	Petroselinum crispum	light responsive
PH02Gene00659.t1	Box 4	ATTAAT	1987	6	-	Petroselinum crispum	light responsive
PH02Gene00659.t1	GATA-motif	AAGGATAAGG	1885	9	-	Solanum tuberosum	light responsive
PH02Gene00659.t1	G-box	CACGAC	1463	6	+	Zea mays	light responsive
PH02Gene00659.t1	G-box	TAACACGTAG	1810	9	-	Brassica oleracea	light responsive
PH02Gene00659.t1	G-box	CACGAC	1832	6	+	Zea mays	light responsive
PH02Gene00659.t1	MRE	AACCTAA	1410	7	-	Petroselinum crispum	light responsive
PH02Gene00659.t1	Sp1	GGGCGG	671	6	+	Oryza sativa	light responsive
PH02Gene00659.t1	Sp1	GGGCGG	691	6	+	Oryza sativa	light responsive
PH02Gene00659.t1	Sp1	GGGCGG	1286	6	-	Oryza sativa	light responsive
PH02Gene00659.t1	TCCC-motif	TCTCCCT	982	7	-	Spinacia oleracea	light responsive
PH02Gene00659.t1	TCCC-motif	TCTCCCT	1200	7	+	Spinacia oleracea	light responsive
PH02Gene00659.t1	TCT-motif	TCTTAC	1055	6	-	Arabidopsis thaliana	light responsive
PH02Gene00659.t1	A-box	CCGTCC	918	6	+	Petroselinum crispum	plant growth and development
PH02Gene00659.t1	A-box	CCGTCC	973	6	-	Petroselinum crispum	plant growth and development
PH02Gene00659.t1	A-box	CCGTCC	1003	6	-	Petroselinum crispum	plant growth and development
PH02Gene00659.t1	CAT-box	GCCACT	662	6	-	Arabidopsis thaliana	plant growth and development
PH02Gene00659.t1	CAT-box	GCCACT	1963	6	+	Arabidopsis thaliana	plant growth and development
PH02Gene00659.t1	Box III	atCATTTTCACt	1646	12	+	Pisum sativum	protein binding site
PH02Gene00659.t1	GC-motif	CCCCCG	155	6	+	Zea mays	stress responsive
PH02Gene00659.t1	GC-motif	CCCCCG	719	6	-	Zea mays	stress responsive
PH02Gene00659.t1	GC-motif	CCCCCG	915	6	+	Zea mays	stress responsive
PH02Gene00659.t1	ARE	AAACCA	1515	6	-	Zea mays	stress responsive
PH02Gene00659.t1	ARE	AAACCA	1683	6	-	Zea mays	stress responsive
PH02Gene00659.t1	ARE	AAACCA	1860	6	+	Zea mays	stress responsive
PH02Gene01097.t1	ABRE	ACGTG	1853	5	-	Arabidopsis thaliana	hormone responsive
PH02Gene01097.t1	ABRE	ACGTG	1902	5	-	Arabidopsis thaliana	hormone responsive
PH02Gene01097.t1	AuxRR-core	GGTCCAT	447	7	+	Nicotiana tabacum	hormone responsive
PH02Gene01097.t1	CGTCA-motif	CGTCA	584	5	-	Hordeum vulgare	hormone responsive
PH02Gene01097.t1	CGTCA-motif	CGTCA	1186	5	+	Hordeum vulgare	hormone responsive
PH02Gene01097.t1	CGTCA-motif	CGTCA	1312	5	+	Hordeum vulgare	hormone responsive
PH02Gene01097.t1	CGTCA-motif	CGTCA	1904	5	+	Hordeum vulgare	hormone responsive
PH02Gene01097.t1	TGACG-motif	TGACG	584	5	+	Hordeum vulgare	hormone responsive
PH02Gene01097.t1	TGACG-motif	TGACG	1186	5	-	Hordeum vulgare	hormone responsive
PH02Gene01097.t1	TGACG-motif	TGACG	1312	5	-	Hordeum vulgare	hormone responsive
PH02Gene01097.t1	TGACG-motif	TGACG	1904	5	-	Hordeum vulgare	hormone responsive
PH02Gene01097.t1	ERE	ATTTCATA	985	8	+	Nicotiana glutinos	hormone responsive
PH02Gene01097.t1	CAAT-box	CCAAT	348	5	+	Arabidopsis thaliana	light responsive
PH02Gene01097.t1	CAAT-box	CCAAT	478	5	-	Arabidopsis thaliana	light responsive
PH02Gene01097.t1	CAAT-box	CAAAT	568	5	-	Pisum sativum	light responsive
PH02Gene01097.t1	CAAT-box	CAAAT	686	5	-	Pisum sativum	light responsive
PH02Gene01097.t1	CAAT-box	CAAAT	847	5	-	Pisum sativum	light responsive
PH02Gene01097.t1	CAAT-box	CAAAT	924	5	+	Pisum sativum	light responsive
PH02Gene01097.t1	CAAT-box	CAAAT	1018	5	+	Pisum sativum	light responsive
PH02Gene01097.t1	CAAT-box	CAAAT	1202	5	+	Pisum sativum	light responsive
PH02Gene01097.t1	CAAT-box	CCAAT	1393	5	+	Arabidopsis thaliana	light responsive
PH02Gene01097.t1	CAAT-box	CAAAT	1464	5	-	Pisum sativum	light responsive
PH02Gene01097.t1	CAAT-box	TGCCAAC	1479	7	-	Petunia hybrida	light responsive
PH02Gene01097.t1	CAAT-box	CCAAT	1567	5	+	Arabidopsis thaliana	light responsive
PH02Gene01097.t1	CAAT-box	CAAAT	1661	5	+	Pisum sativum	light responsive
PH02Gene01097.t1	CAAT-box	CCAAT	1730	5	+	Arabidopsis thaliana	light responsive
PH02Gene01097.t1	CAAT-box	CAAAT	1969	5	+	Pisum sativum	light responsive
PH02Gene01097.t1	Box 4	ATTAAT	1505	6	-	Petroselinum crispum	light responsive
PH02Gene01097.t1	GATA-motif	GATAGGG	836	7	+	Pisum sativum	light responsive
PH02Gene01097.t1	G-box	CACGAC	222	6	+	Zea mays	light responsive
PH02Gene01097.t1	G-box	CACGTC	1902	6	+	Zea mays	light responsive
PH02Gene01097.t1	G-Box	CACGTT	1853	6	+	Pisum sativum	light responsive
PH02Gene01097.t1	I-box	atGATAAGGTC	188	10	+	Helianthus annuus	light responsive
PH02Gene01097.t1	MRE	AACCTAA	83	7	-	Petroselinum crispum	light responsive
PH02Gene01097.t1	Sp1	GGGCGG	1793	6	-	Oryza sativa	light responsive
PH02Gene01097.t1	Sp1	GGGCGG	1954	6	-	Oryza sativa	light responsive
PH02Gene01097.t1	TCT-motif	TCTTAC	99	6	+	Arabidopsis thaliana	light responsive
PH02Gene01097.t1	TCT-motif	TCTTAC	131	6	+	Arabidopsis thaliana	light responsive
PH02Gene01097.t1	CCAAT-box	CAACGG	692	6	-	Hordeum vulgare	MYBHv1 binding site
PH02Gene01097.t1	CCAAT-box	CAACGG	1089	6	+	Hordeum vulgare	MYBHv1 binding site
PH02Gene01097.t1	CCAAT-box	CAACGG	1519	6	-	Hordeum vulgare	MYBHv1 binding site
PH02Gene01097.t1	CCAAT-box	CAACGG	1710	6	+	Hordeum vulgare	MYBHv1 binding site
PH02Gene01097.t1	A-box	CCGTCC	1766	6	+	Petroselinum crispum	plant growth and development
PH02Gene01097.t1	CAT-box	GCCACT	631	6	+	Arabidopsis thaliana	plant growth and development
PH02Gene01097.t1	CAT-box	GCCACT	662	6	+	Arabidopsis thaliana	plant growth and development
PH02Gene01097.t1	CAT-box	GCCACT	1107	6	-	Arabidopsis thaliana	plant growth and development
PH02Gene01097.t1	CAT-box	GCCACT	1138	6	-	Arabidopsis thaliana	plant growth and development
PH02Gene01097.t1	O2-site	GTTGACGTGA	332	9	-	Zea mays	plant growth and development
PH02Gene01097.t1	MBS	CAACTG	274	6	+	Arabidopsis thaliana	stess responsive
PH02Gene01097.t1	MBS	CAACTG	467	6	+	Arabidopsis thaliana	stess responsive
PH02Gene01097.t1	MBS	CAACTG	673	6	-	Arabidopsis thaliana	stess responsive
PH02Gene01097.t1	MBS	CAACTG	1096	6	+	Arabidopsis thaliana	stess responsive
PH02Gene01097.t1	WUN-motif	AAATTACT	611	8	+	Nicotiana glutinosa	stess responsive
PH02Gene01097.t1	LTR	CCGAAA	888	6	+	Hordeum vulgare	stress responsive
PH02Gene01097.t1	LTR	CCGAAA	1249	6	+	Hordeum vulgare	stress responsive
PH02Gene01097.t1	LTR	CCGAAA	1413	6	+	Hordeum vulgare	stress responsive
PH02Gene01097.t1	TC-rich repeats	GTTTTCTTAC	95	9	+	Nicotiana tabacum	stress responsive
PH02Gene01097.t1	TC-rich repeats	GTTTTCTTAC	127	9	+	Nicotiana tabacum	stress responsive
PH02Gene01616.t2	TATC-box	TATCCCA	213	7	+	Oryza sativa	hormone responsive
PH02Gene01616.t2	TATC-box	TATCCCA	308	7	+	Oryza sativa	hormone responsive
PH02Gene01616.t2	ABRE	ACGTG	1257	5	-	Arabidopsis thaliana	hormone responsive
PH02Gene01616.t2	ABRE	ACGTG	1426	5	-	Arabidopsis thaliana	hormone responsive
PH02Gene01616.t2	CGTCA-motif	CGTCA	577	5	+	Hordeum vulgare	hormone responsive
PH02Gene01616.t2	CGTCA-motif	CGTCA	587	5	+	Hordeum vulgare	hormone responsive
PH02Gene01616.t2	CGTCA-motif	CGTCA	1043	5	+	Hordeum vulgare	hormone responsive
PH02Gene01616.t2	CGTCA-motif	CGTCA	1069	5	-	Hordeum vulgare	hormone responsive
PH02Gene01616.t2	CGTCA-motif	CGTCA	1686	5	+	Hordeum vulgare	hormone responsive
PH02Gene01616.t2	TGACG-motif	TGACG	577	5	-	Hordeum vulgare	hormone responsive
PH02Gene01616.t2	TGACG-motif	TGACG	587	5	-	Hordeum vulgare	hormone responsive
PH02Gene01616.t2	TGACG-motif	TGACG	1043	5	-	Hordeum vulgare	hormone responsive
PH02Gene01616.t2	TGACG-motif	TGACG	1069	5	+	Hordeum vulgare	hormone responsive
PH02Gene01616.t2	TGACG-motif	TGACG	1686	5	-	Hordeum vulgare	hormone responsive
PH02Gene01616.t2	P-box	CCTTTTG	1614	7	+	Oryza sativa	hormone responsive
PH02Gene01616.t2	CAAT-box	CCAAT	8	5	-	Arabidopsis thaliana	light responsive
PH02Gene01616.t2	CAAT-box	CAAAT	14	5	-	Pisum sativum	light responsive
PH02Gene01616.t2	CAAT-box	CAAAT	68	5	-	Pisum sativum	light responsive
PH02Gene01616.t2	CAAT-box	CAAAT	82	5	+	Pisum sativum	light responsive
PH02Gene01616.t2	CAAT-box	CAAAT	106	5	+	Pisum sativum	light responsive
PH02Gene01616.t2	CAAT-box	CAAAT	162	5	+	Pisum sativum	light responsive
PH02Gene01616.t2	CAAT-box	CAAAT	504	5	-	Pisum sativum	light responsive
PH02Gene01616.t2	CAAT-box	CAAAT	603	5	-	Pisum sativum	light responsive
PH02Gene01616.t2	CAAT-box	CCAAT	942	5	-	Arabidopsis thaliana	light responsive
PH02Gene01616.t2	CAAT-box	CAAAT	1483	5	+	Pisum sativum	light responsive
PH02Gene01616.t2	CAAT-box	CAAAT	1624	5	+	Pisum sativum	light responsive
PH02Gene01616.t2	CAAT-box	CCAAT	1691	5	-	Arabidopsis thaliana	light responsive
PH02Gene01616.t2	CAAT-box	CAAAT	1861	5	+	Pisum sativum	light responsive
PH02Gene01616.t2	ATCT-motif	AATCTAATCC	1700	9	-	Pisum sativum	light responsive
PH02Gene01616.t2	chs-CMA	TTACTTAA	1916	8	+	Daucus carota	light responsive
PH02Gene01616.t2	GATA-motif	AAGGATAAGG	1107	9	+	Solanum tuberosum	light responsive
PH02Gene01616.t2	G-Box	CACGTT	1426	6	+	Pisum sativum	light responsive
PH02Gene01616.t2	G-box	CACGAC	270	6	-	Zea mays	light responsive
PH02Gene01616.t2	G-box	CACGAC	1242	6	-	Zea mays	light responsive
PH02Gene01616.t2	G-box	CACGTC	1257	6	+	Zea mays	light responsive
PH02Gene01616.t2	GT1-motif	GGTTAAT	913	7	+	Avena sativa	light responsive
PH02Gene01616.t2	I-box	gGATAAGGTG	1109	9	+	Zea mays	light responsive
PH02Gene01616.t2	I-box	gGATAAGGTG	1505	9	-	Zea mays	light responsive
PH02Gene01616.t2	MRE	AACCTAA	910	7	-	Petroselinum crispum	light responsive
PH02Gene01616.t2	Sp1	GGGCGG	1513	6	-	Oryza sativa	light responsive
PH02Gene01616.t2	TCCC-motif	TCTCCCT	428	7	+	Spinacia oleracea	light responsive
PH02Gene01616.t2	TCCC-motif	TCTCCCT	1992	7	-	Spinacia oleracea	light responsive
PH02Gene01616.t2	TCT-motif	TCTTAC	617	6	+	Arabidopsis thaliana	light responsive
PH02Gene01616.t2	CAT-box	GCCACT	233	6	-	Arabidopsis thaliana	plant growth and development
PH02Gene01616.t2	CAT-box	GCCACT	1023	6	-	Arabidopsis thaliana	plant growth and development
PH02Gene01616.t2	CAT-box	GCCACT	1629	6	+	Arabidopsis thaliana	plant growth and development
PH02Gene01616.t2	O2-site	GATGA(C/T)(A/G)TG(A/G)	1898	8	-	Zea mays	plant growth and development
PH02Gene01616.t2	O2-site	GATGA(C/T)(A/G)TG(A/G)	1903	8	-	Zea mays	plant growth and development
PH02Gene01616.t2	MBS	CAACTG	226	6	+	Arabidopsis thaliana	stess responsive
PH02Gene01616.t2	LTR	CCGAAA	497	6	-	Hordeum vulgare	stress responsive
PH02Gene01616.t2	LTR	CCGAAA	675	6	-	Hordeum vulgare	stress responsive
PH02Gene01616.t2	GC-motif	CCCCCG	678	6	-	Zea mays	stress responsive
PH02Gene01616.t2	GC-motif	CCCCCG	1195	6	+	Zea mays	stress responsive
PH02Gene01616.t2	TC-rich repeats	ATTCTCTAAC	934	9	-	Nicotiana tabacum	stress responsive
PH02Gene01617.t1	TGA-element	AACGAC	1461	6	-	Brassica oleracea	hormone responsive
PH02Gene01617.t1	TATC-box	TATCCCA	214	7	-	Oryza sativa	hormone responsive
PH02Gene01617.t1	TCA-element	CCATCTTTTT	714	9	+	Nicotiana tabacum	hormone responsive
PH02Gene01617.t1	CGTCA-motif	CGTCA	1571	5	-	Hordeum vulgare	hormone responsive
PH02Gene01617.t1	TGACG-motif	TGACG	1571	5	+	Hordeum vulgare	hormone responsive
PH02Gene01617.t1	GARE-motif	TCTGTTG	137	7	+	Brassica oleracea	hormone responsive
PH02Gene01617.t1	GARE-motif	TCTGTTG	419	7	+	Brassica oleracea	hormone responsive
PH02Gene01617.t1	CAAT-box	CAAAT	68	5	+	Pisum sativum	light responsive
PH02Gene01617.t1	CAAT-box	CAAAT	129	5	-	Pisum sativum	light responsive
PH02Gene01617.t1	CAAT-box	TGCCAAC	140	7	-	Petunia hybrida	light responsive
PH02Gene01617.t1	CAAT-box	CCAAT	386	5	+	Arabidopsis thaliana	light responsive
PH02Gene01617.t1	CAAT-box	CCAAT	429	5	-	Arabidopsis thaliana	light responsive
PH02Gene01617.t1	CAAT-box	CAAAT	495	5	-	Pisum sativum	light responsive
PH02Gene01617.t1	CAAT-box	CCAAT	500	5	-	Arabidopsis thaliana	light responsive
PH02Gene01617.t1	CAAT-box	TGCCAAC	539	7	-	Petunia hybrida	light responsive
PH02Gene01617.t1	CAAT-box	CCAAT	817	5	-	Arabidopsis thaliana	light responsive
PH02Gene01617.t1	CAAT-box	CAAAT	859	5	+	Pisum sativum	light responsive
PH02Gene01617.t1	CAAT-box	CAAAT	886	5	+	Pisum sativum	light responsive
PH02Gene01617.t1	CAAT-box	CCAAT	950	5	-	Arabidopsis thaliana	light responsive
PH02Gene01617.t1	CAAT-box	CCAAT	1268	5	-	Arabidopsis thaliana	light responsive
PH02Gene01617.t1	CAAT-box	CAAAT	1684	5	+	Pisum sativum	light responsive
PH02Gene01617.t1	CAAT-box	CAAAT	1783	5	+	Pisum sativum	light responsive
PH02Gene01617.t1	ATCT-motif	AATCTAATCC	1023	9	-	Pisum sativum	light responsive
PH02Gene01617.t1	Box 4	ATTAAT	921	6	+	Petroselinum crispum	light responsive
PH02Gene01617.t1	chs-CMA	TCACTTGA	1219	8	-	Petroselinum crispum	light responsive
PH02Gene01617.t1	GATA-motif	AAGGATAAGG	146	9	+	Solanum tuberosum	light responsive
PH02Gene01617.t1	GATA-motif	AAGGATAAGG	822	9	-	Solanum tuberosum	light responsive
PH02Gene01617.t1	G-box	CACGAC	1849	6	+	Zea mays	light responsive
PH02Gene01617.t1	GT1-motif	GGTTAAT	690	7	+	Avena sativa	light responsive
PH02Gene01617.t1	AE-box	AGAAACAA	1599	8	+	Arabidopsis thaliana	light responsive
PH02Gene01617.t1	GCN4_motif	TGAGTCA	172	7	+	Oryza sativa	plant growth and development
PH02Gene01617.t1	HD-Zip 1	CAAT(A/T)ATTG	1393	8	-	Arabidopsis thaliana	plant growth and development
PH02Gene01617.t1	MBS	CAACTG	447	6	-	Arabidopsis thaliana	stess responsive
PH02Gene01617.t1	MBS	CAACTG	1124	6	+	Arabidopsis thaliana	stess responsive
PH02Gene01619.t1	TGA-element	AACGAC	653	6	+	Brassica oleracea	hormone responsive
PH02Gene01619.t1	TCA-element	CCATCTTTTT	1486	9	-	Nicotiana tabacum	hormone responsive
PH02Gene01619.t1	ABRE	ACGTG	203	5	-	Arabidopsis thaliana	hormone responsive
PH02Gene01619.t1	ABRE	ACGTG	505	5	+	Arabidopsis thaliana	hormone responsive
PH02Gene01619.t1	ABRE	GCCGCGTGGC	889	9	+	Oryza sativa	hormone responsive
PH02Gene01619.t1	ABRE	GCCGCGTGGC	923	9	-	Oryza sativa	hormone responsive
PH02Gene01619.t1	CGTCA-motif	CGTCA	205	5	+	Hordeum vulgare	hormone responsive
PH02Gene01619.t1	CGTCA-motif	CGTCA	1146	5	-	Hordeum vulgare	hormone responsive
PH02Gene01619.t1	TGACG-motif	TGACG	205	5	-	Hordeum vulgare	hormone responsive
PH02Gene01619.t1	TGACG-motif	TGACG	1146	5	+	Hordeum vulgare	hormone responsive
PH02Gene01619.t1	CAAT-box	CCAAT	105	5	+	Arabidopsis thaliana	light responsive
PH02Gene01619.t1	CAAT-box	CCAAT	182	5	-	Arabidopsis thaliana	light responsive
PH02Gene01619.t1	CAAT-box	CCAAT	239	5	+	Arabidopsis thaliana	light responsive
PH02Gene01619.t1	CAAT-box	CAAAT	272	5	-	Pisum sativum	light responsive
PH02Gene01619.t1	CAAT-box	CCAAT	353	5	+	Arabidopsis thaliana	light responsive
PH02Gene01619.t1	CAAT-box	CAAAT	366	5	-	Pisum sativum	light responsive
PH02Gene01619.t1	CAAT-box	CAAAT	408	5	+	Pisum sativum	light responsive
PH02Gene01619.t1	CAAT-box	CCAAT	595	5	+	Arabidopsis thaliana	light responsive
PH02Gene01619.t1	CAAT-box	CCAAT	756	5	+	Arabidopsis thaliana	light responsive
PH02Gene01619.t1	CAAT-box	CAAAT	786	5	+	Pisum sativum	light responsive
PH02Gene01619.t1	CAAT-box	CAAAT	815	5	+	Pisum sativum	light responsive
PH02Gene01619.t1	CAAT-box	CCAAT	1339	5	-	Arabidopsis thaliana	light responsive
PH02Gene01619.t1	CAAT-box	CAAAT	1421	5	-	Pisum sativum	light responsive
PH02Gene01619.t1	ATCT-motif	AATCTAATCC	1641	9	-	Pisum sativum	light responsive
PH02Gene01619.t1	Box 4	ATTAAT	422	6	+	Petroselinum crispum	light responsive
PH02Gene01619.t1	Box 4	ATTAAT	1346	6	-	Petroselinum crispum	light responsive
PH02Gene01619.t1	Box 4	ATTAAT	1686	6	-	Petroselinum crispum	light responsive
PH02Gene01619.t1	G-box	CACGTC	203	6	+	Zea mays	light responsive
PH02Gene01619.t1	G-box	CACGTC	504	6	-	Zea mays	light responsive
PH02Gene01619.t1	Sp1	GGGCGG	870	6	+	Oryza sativa	light responsive
PH02Gene01619.t1	Sp1	GGGCGG	1000	6	+	Oryza sativa	light responsive
PH02Gene01619.t1	AE-box	AGAAACAA	647	8	+	Arabidopsis thaliana	light responsive
PH02Gene01619.t1	CCAAT-box	CAACGG	248	6	-	Hordeum vulgare	MYBHv1 binding site
PH02Gene01619.t1	CCAAT-box	CAACGG	1213	6	-	Hordeum vulgare	MYBHv1 binding site
PH02Gene01619.t1	CCAAT-box	CAACGG	1809	6	+	Hordeum vulgare	MYBHv1 binding site
PH02Gene01619.t1	plant_AP-2-like	CGACCAGG	970	8	+	Oryza sativa	plant growth and development
PH02Gene01619.t1	CAT-box	GCCACT	474	6	-	Arabidopsis thaliana	plant growth and development
PH02Gene01619.t1	CAT-box	GCCACT	1732	6	+	Arabidopsis thaliana	plant growth and development
PH02Gene01619.t1	MBS	CAACTG	358	6	-	Arabidopsis thaliana	stess responsive
PH02Gene01619.t1	GC-motif	CCCCCG	905	6	-	Zea mays	stress responsive
PH02Gene01619.t1	GC-motif	CCCCCG	964	6	-	Zea mays	stress responsive
PH02Gene01619.t1	GC-motif	CCCCCG	1003	6	-	Zea mays	stress responsive
PH02Gene01619.t1	GC-motif	CCCCCG	1098	6	-	Zea mays	stress responsive
PH02Gene01619.t1	ARE	AAACCA	1669	6	-	Zea mays	stress responsive
PH02Gene01972.t1	AT-rich sequence	TAAAATACT	1830	9	-	Pisum sativum	element for maximal elicitor-mediated activation (2copies)
PH02Gene01972.t1	ABRE	ACGTG	522	5	-	Arabidopsis thaliana	hormone responsive
PH02Gene01972.t1	ABRE	ACGTG	1384	5	-	Arabidopsis thaliana	hormone responsive
PH02Gene01972.t1	ABRE	ACGTG	1510	5	+	Arabidopsis thaliana	hormone responsive
PH02Gene01972.t1	ABRE	CACGTG	1870	6	-	Arabidopsis thaliana	hormone responsive
PH02Gene01972.t1	ABRE	ACGTG	1871	5	+	Arabidopsis thaliana	hormone responsive
PH02Gene01972.t1	CAAT-box	CAAAT	443	5	+	Pisum sativum	light responsive
PH02Gene01972.t1	CAAT-box	CCAAT	1277	5	+	Arabidopsis thaliana	light responsive
PH02Gene01972.t1	CAAT-box	TGCCAAC	1400	7	-	Petunia hybrida	light responsive
PH02Gene01972.t1	CAAT-box	CAAAT	1421	5	+	Pisum sativum	light responsive
PH02Gene01972.t1	CAAT-box	CAAAT	1785	5	-	Pisum sativum	light responsive
PH02Gene01972.t1	CAAT-box	CAAAT	1816	5	-	Pisum sativum	light responsive
PH02Gene01972.t1	GATA-motif	GATAGGA	630	7	-	Arabidopsis thaliana	light responsive
PH02Gene01972.t1	G-Box	CACGTG	1870	6	-	Pisum sativum	light responsive
PH02Gene01972.t1	G-box	CACGAC	392	6	+	Zea mays	light responsive
PH02Gene01972.t1	G-box	TACGTG	522	6	-	Arabidopsis thaliana	light responsive
PH02Gene01972.t1	G-box	CACGAC	1297	6	-	Zea mays	light responsive
PH02Gene01972.t1	G-box	CACGTC	1384	6	+	Zea mays	light responsive
PH02Gene01972.t1	G-box	TACGTG	1509	6	+	Arabidopsis thaliana	light responsive
PH02Gene01972.t1	G-box	CACGTG	1870	6	-	Arabidopsis thaliana	light responsive
PH02Gene01972.t1	GT1-motif	GTGTGTGAA	1512	9	+	Solanum tuberosum	light responsive
PH02Gene01972.t1	TCT-motif	TCTTAC	1058	6	+	Arabidopsis thaliana	light responsive
PH02Gene01972.t1	CCAAT-box	CAACGG	1589	6	-	Hordeum vulgare	MYBHv1 binding site
PH02Gene01972.t1	CAT-box	GCCACT	737	6	-	Arabidopsis thaliana	plant growth and development
PH02Gene01972.t1	CAT-box	GCCACT	862	6	-	Arabidopsis thaliana	plant growth and development
PH02Gene01972.t1	GCN4_motif	TGAGTCA	517	7	-	Oryza sativa	plant growth and development
PH02Gene01972.t1	LTR	CCGAAA	566	6	+	Hordeum vulgare	stress responsive
PH02Gene01972.t1	LTR	CCGAAA	1845	6	-	Hordeum vulgare	stress responsive
PH02Gene01972.t1	GC-motif	CCCCCG	545	6	+	Zea mays	stress responsive
PH02Gene02301.t1	AuxRR-core	GGTCCAT	415	7	+	Nicotiana tabacum	hormone responsive
PH02Gene02301.t1	CGTCA-motif	CGTCA	1152	5	+	Hordeum vulgare	hormone responsive
PH02Gene02301.t1	CGTCA-motif	CGTCA	1218	5	+	Hordeum vulgare	hormone responsive
PH02Gene02301.t1	TGACG-motif	TGACG	1152	5	-	Hordeum vulgare	hormone responsive
PH02Gene02301.t1	TGACG-motif	TGACG	1218	5	-	Hordeum vulgare	hormone responsive
PH02Gene02301.t1	P-box	CCTTTTG	1799	7	+	Oryza sativa	hormone responsive
PH02Gene02301.t1	CAAT-box	CCAAT	88	5	+	Arabidopsis thaliana	light responsive
PH02Gene02301.t1	CAAT-box	CCAAT	160	5	+	Arabidopsis thaliana	light responsive
PH02Gene02301.t1	CAAT-box	TGCCAAC	672	7	+	Petunia hybrida	light responsive
PH02Gene02301.t1	CAAT-box	CCAAT	686	5	+	Arabidopsis thaliana	light responsive
PH02Gene02301.t1	CAAT-box	CAAAT	819	5	-	Pisum sativum	light responsive
PH02Gene02301.t1	CAAT-box	CCAAT	855	5	+	Arabidopsis thaliana	light responsive
PH02Gene02301.t1	CAAT-box	CCAAT	899	5	+	Arabidopsis thaliana	light responsive
PH02Gene02301.t1	CAAT-box	CCAAT	922	5	+	Arabidopsis thaliana	light responsive
PH02Gene02301.t1	CAAT-box	CAAAT	1084	5	-	Pisum sativum	light responsive
PH02Gene02301.t1	CAAT-box	CAAAT	1323	5	-	Pisum sativum	light responsive
PH02Gene02301.t1	CAAT-box	TGCCAAC	1326	7	+	Petunia hybrida	light responsive
PH02Gene02301.t1	CAAT-box	CAAAT	1782	5	-	Pisum sativum	light responsive
PH02Gene02301.t1	CAAT-box	CCAAT	1952	5	-	Arabidopsis thaliana	light responsive
PH02Gene02301.t1	3-AF1 binding site	TAAGAGAGGAA	1259	10	+	Solanum tuberosum	light responsive
PH02Gene02301.t1	Gap-box	CAAATGAA(A/G)A	1777	9.5	-	Arabidopsis thaliana	light responsive
PH02Gene02301.t1	GATA-motif	AAGGATAAGG	457	9	-	Solanum tuberosum	light responsive
PH02Gene02301.t1	G-box	CACGAC	1830	6	+	Zea mays	light responsive
PH02Gene02301.t1	GT1-motif	GGTTAAT	1530	7	+	Avena sativa	light responsive
PH02Gene02301.t1	GT1-motif	GGTTAAT	1986	7	+	Avena sativa	light responsive
PH02Gene02301.t1	I-box	AGATAAGG	1414	8	+	Triticum aestivum	light responsive
PH02Gene02301.t1	TCT-motif	TCTTAC	1258	6	-	Arabidopsis thaliana	light responsive
PH02Gene02301.t1	CCAAT-box	CAACGG	11	6	+	Hordeum vulgare	MYBHv1 binding site
PH02Gene02301.t1	MSA-like	(T/C)C(T/C)AACGG(T/C)(T/C)A	1353	8.5	-	Catharanthus roseus	plant growth and development
PH02Gene02301.t1	CAT-box	GCCACT	359	6	+	Arabidopsis thaliana	plant growth and development
PH02Gene02301.t1	CAT-box	GCCACT	1963	6	+	Arabidopsis thaliana	plant growth and development
PH02Gene02301.t1	Box III	atCATTTTCACt	1668	12	+	Pisum sativum	protein binding site
PH02Gene02301.t1	ARE	AAACCA	726	6	+	Zea mays	stress responsive
PH02Gene02301.t1	ARE	AAACCA	1056	6	-	Zea mays	stress responsive
PH02Gene02301.t1	ARE	AAACCA	1536	6	-	Zea mays	stress responsive
PH02Gene02301.t1	ARE	AAACCA	1702	6	-	Zea mays	stress responsive
PH02Gene02301.t1	ARE	AAACCA	1869	6	+	Zea mays	stress responsive
PH02Gene02301.t1	TC-rich repeats	ATTCTCTAAC	708	9	+	Nicotiana tabacum	stress responsive
PH02Gene02907.t1	TATC-box	TATCCCA	633	7	-	Oryza sativa	hormone responsive
PH02Gene02907.t1	TCA-element	CCATCTTTTT	5	9	-	Nicotiana tabacum	hormone responsive
PH02Gene02907.t1	TCA-element	CCATCTTTTT	450	9	+	Nicotiana tabacum	hormone responsive
PH02Gene02907.t1	ABRE	ACGTG	359	5	+	Arabidopsis thaliana	hormone responsive
PH02Gene02907.t1	ABRE	ACGTG	602	5	-	Arabidopsis thaliana	hormone responsive
PH02Gene02907.t1	CGTCA-motif	CGTCA	288	5	-	Hordeum vulgare	hormone responsive
PH02Gene02907.t1	CGTCA-motif	CGTCA	317	5	+	Hordeum vulgare	hormone responsive
PH02Gene02907.t1	CGTCA-motif	CGTCA	350	5	+	Hordeum vulgare	hormone responsive
PH02Gene02907.t1	CGTCA-motif	CGTCA	1454	5	+	Hordeum vulgare	hormone responsive
PH02Gene02907.t1	TGACG-motif	TGACG	288	5	+	Hordeum vulgare	hormone responsive
PH02Gene02907.t1	TGACG-motif	TGACG	317	5	-	Hordeum vulgare	hormone responsive
PH02Gene02907.t1	TGACG-motif	TGACG	350	5	-	Hordeum vulgare	hormone responsive
PH02Gene02907.t1	TGACG-motif	TGACG	1454	5	-	Hordeum vulgare	hormone responsive
PH02Gene02907.t1	ERE	ATTTTAAA	59	8	-	Nicotiana glutinos	hormone responsive
PH02Gene02907.t1	CAAT-box	CAAAT	38	5	-	Pisum sativum	light responsive
PH02Gene02907.t1	CAAT-box	CAAAT	116	5	+	Pisum sativum	light responsive
PH02Gene02907.t1	CAAT-box	CAAAT	421	5	+	Pisum sativum	light responsive
PH02Gene02907.t1	CAAT-box	CCAAT	631	5	-	Arabidopsis thaliana	light responsive
PH02Gene02907.t1	CAAT-box	CAAAT	1077	5	-	Pisum sativum	light responsive
PH02Gene02907.t1	CAAT-box	CAAAT	1501	5	+	Pisum sativum	light responsive
PH02Gene02907.t1	ATCT-motif	AATCTAATCC	589	9	-	Pisum sativum	light responsive
PH02Gene02907.t1	Box 4	ATTAAT	23	6	+	Petroselinum crispum	light responsive
PH02Gene02907.t1	GATA-motif	GATAGGA	1812	7	+	Arabidopsis thaliana	light responsive
PH02Gene02907.t1	G-box	CACGTC	358	6	-	Zea mays	light responsive
PH02Gene02907.t1	G-box	TACGTG	602	6	-	Arabidopsis thaliana	light responsive
PH02Gene02907.t1	G-box	CACGAC	815	6	+	Zea mays	light responsive
PH02Gene02907.t1	G-box	CACGAC	941	6	-	Zea mays	light responsive
PH02Gene02907.t1	G-box	CACGAC	1434	6	+	Zea mays	light responsive
PH02Gene02907.t1	GT1-motif	GGTTAA	1267	6	-	Arabidopsis thaliana	light responsive
PH02Gene02907.t1	Sp1	GGGCGG	1648	6	-	Oryza sativa	light responsive
PH02Gene02907.t1	A-box	CCGTCC	264	6	-	Petroselinum crispum	plant growth and development
PH02Gene02907.t1	CAT-box	GCCACT	480	6	+	Arabidopsis thaliana	plant growth and development
PH02Gene02907.t1	CAT-box	GCCACT	1532	6	-	Arabidopsis thaliana	plant growth and development
PH02Gene02907.t1	MBSI	TTTTTACGGTTA	1868	11	+	Petunia hybrida	plant growth and development
PH02Gene02907.t1	MBS	CAACTG	994	6	-	Arabidopsis thaliana	stess responsive
PH02Gene02907.t1	MBS	CAACTG	1752	6	-	Arabidopsis thaliana	stess responsive
PH02Gene02969.t1	ABRE	TACGTGTC	378	8	+	Oryza sativa	hormone responsive
PH02Gene02969.t1	ABRE	ACGTG	379	5	+	Arabidopsis thaliana	hormone responsive
PH02Gene02969.t1	ABRE	ACGTG	1020	5	-	Arabidopsis thaliana	hormone responsive
PH02Gene02969.t1	CGTCA-motif	CGTCA	372	5	+	Hordeum vulgare	hormone responsive
PH02Gene02969.t1	TGACG-motif	TGACG	372	5	-	Hordeum vulgare	hormone responsive
PH02Gene02969.t1	CAAT-box	CCAAT	41	5	+	Arabidopsis thaliana	light responsive
PH02Gene02969.t1	CAAT-box	CAAAT	166	5	+	Pisum sativum	light responsive
PH02Gene02969.t1	CAAT-box	CCAAT	307	5	-	Arabidopsis thaliana	light responsive
PH02Gene02969.t1	CAAT-box	CCAAT	902	5	+	Arabidopsis thaliana	light responsive
PH02Gene02969.t1	CAAT-box	CCAAT	1424	5	+	Arabidopsis thaliana	light responsive
PH02Gene02969.t1	CAAT-box	CCAAT	1475	5	-	Arabidopsis thaliana	light responsive
PH02Gene02969.t1	CAAT-box	CAAAT	1678	5	-	Pisum sativum	light responsive
PH02Gene02969.t1	CAAT-box	CCAAT	1824	5	+	Arabidopsis thaliana	light responsive
PH02Gene02969.t1	G-box	GCCACGTGGA	20	9	-	Arabidopsis thaliana	light responsive
PH02Gene02969.t1	G-box	TACGTG	378	6	+	Arabidopsis thaliana	light responsive
PH02Gene02969.t1	G-box	CACGAC	383	6	-	Zea mays	light responsive
PH02Gene02969.t1	G-box	CACGTC	1020	6	+	Zea mays	light responsive
PH02Gene02969.t1	GT1-motif	GGTTAAT	1173	7	+	Avena sativa	light responsive
PH02Gene02969.t1	MRE	AACCTAA	214	7	+	Petroselinum crispum	light responsive
PH02Gene02969.t1	Sp1	GGGCGG	423	6	+	Oryza sativa	light responsive
PH02Gene02969.t1	Sp1	GGGCGG	874	6	-	Oryza sativa	light responsive
PH02Gene02969.t1	TCT-motif	TCTTAC	1105	6	-	Arabidopsis thaliana	light responsive
PH02Gene02969.t1	TCT-motif	TCTTAC	1713	6	-	Arabidopsis thaliana	light responsive
PH02Gene02969.t1	A-box	CCGTCC	688	6	+	Petroselinum crispum	plant growth and development
PH02Gene02969.t1	A-box	CCGTCC	949	6	+	Petroselinum crispum	plant growth and development
PH02Gene02969.t1	RY-element	CATGCATG	192	8	+	Helianthus annuus	plant growth and development
PH02Gene02969.t1	MBSI	aaaAaaC(G/C)GTTA	1646	11	-	Petunia hybrida	plant growth and development
PH02Gene02969.t1	O2-site	GATGATGTGG	90	10	+	Zea mays	plant growth and development
PH02Gene02969.t1	MBS	CAACTG	1598	6	+	Arabidopsis thaliana	stess responsive
PH02Gene02969.t1	ARE	AAACCA	237	6	+	Zea mays	stress responsive
PH02Gene02969.t1	ARE	AAACCA	1158	6	+	Zea mays	stress responsive
PH02Gene02969.t1	ARE	AAACCA	1428	6	-	Zea mays	stress responsive
PH02Gene03219.t1	TGA-element	AACGAC	209	6	+	Brassica oleracea	hormone responsive
PH02Gene03219.t1	TCA-element	CCATCTTTTT	1323	9	+	Nicotiana tabacum	hormone responsive
PH02Gene03219.t1	ABRE	ACGTG	169	5	+	Arabidopsis thaliana	hormone responsive
PH02Gene03219.t1	ABRE	CACGTG	1506	6	-	Arabidopsis thaliana	hormone responsive
PH02Gene03219.t1	ABRE	ACGTG	1507	5	+	Arabidopsis thaliana	hormone responsive
PH02Gene03219.t1	CGTCA-motif	CGTCA	167	5	-	Hordeum vulgare	hormone responsive
PH02Gene03219.t1	CGTCA-motif	CGTCA	683	5	+	Hordeum vulgare	hormone responsive
PH02Gene03219.t1	CGTCA-motif	CGTCA	1907	5	-	Hordeum vulgare	hormone responsive
PH02Gene03219.t1	TGACG-motif	TGACG	167	5	+	Hordeum vulgare	hormone responsive
PH02Gene03219.t1	TGACG-motif	TGACG	683	5	-	Hordeum vulgare	hormone responsive
PH02Gene03219.t1	TGACG-motif	TGACG	1907	5	+	Hordeum vulgare	hormone responsive
PH02Gene03219.t1	GARE-motif	TCTGTTG	96	7	-	Brassica oleracea	hormone responsive
PH02Gene03219.t1	P-box	CCTTTTG	920	7	-	Oryza sativa	hormone responsive
PH02Gene03219.t1	CAAT-box	TGCCAAC	91	7	-	Petunia hybrida	light responsive
PH02Gene03219.t1	CAAT-box	CAAAT	494	5	+	Pisum sativum	light responsive
PH02Gene03219.t1	CAAT-box	CCCAATTT	515	8	+	Arabidopsis thaliana	light responsive
PH02Gene03219.t1	CAAT-box	CCAAT	516	5	+	Arabidopsis thaliana	light responsive
PH02Gene03219.t1	CAAT-box	CAAAT	695	5	+	Pisum sativum	light responsive
PH02Gene03219.t1	CAAT-box	CCAAT	1083	5	-	Arabidopsis thaliana	light responsive
PH02Gene03219.t1	CAAT-box	CCAAT	1165	5	+	Arabidopsis thaliana	light responsive
PH02Gene03219.t1	CAAT-box	CAAAT	1175	5	-	Pisum sativum	light responsive
PH02Gene03219.t1	CAAT-box	CAAAT	1203	5	+	Pisum sativum	light responsive
PH02Gene03219.t1	CAAT-box	CCAAT	1335	5	+	Arabidopsis thaliana	light responsive
PH02Gene03219.t1	CAAT-box	CCAAT	1445	5	+	Arabidopsis thaliana	light responsive
PH02Gene03219.t1	CAAT-box	CAAAT	1810	5	-	Pisum sativum	light responsive
PH02Gene03219.t1	CAAT-box	CAAAT	1899	5	-	Pisum sativum	light responsive
PH02Gene03219.t1	CAAT-box	CCAAT	1925	5	-	Arabidopsis thaliana	light responsive
PH02Gene03219.t1	CAAT-box	CAAAT	1949	5	-	Pisum sativum	light responsive
PH02Gene03219.t1	CAAT-box	CAAAT	1982	5	-	Pisum sativum	light responsive
PH02Gene03219.t1	3-AF1 binding site	TAAGAGAGGAA	136	10	-	Solanum tuberosum	light responsive
PH02Gene03219.t1	Box 4	ATTAAT	1436	6	-	Petroselinum crispum	light responsive
PH02Gene03219.t1	Box 4	ATTAAT	1930	6	-	Petroselinum crispum	light responsive
PH02Gene03219.t1	G-box	CACGTC	168	6	-	Zea mays	light responsive
PH02Gene03219.t1	G-box	CACGAC	972	6	+	Zea mays	light responsive
PH02Gene03219.t1	G-box	CACGAC	1488	6	+	Zea mays	light responsive
PH02Gene03219.t1	G-box	CACGTG	1506	6	-	Arabidopsis thaliana	light responsive
PH02Gene03219.t1	G-Box	CACGTG	1506	6	-	Pisum sativum	light responsive
PH02Gene03219.t1	GT1-motif	GGTTAAT	1090	7	-	Avena sativa	light responsive
PH02Gene03219.t1	GT1-motif	GGTTAA	1091	6	-	Arabidopsis thaliana	light responsive
PH02Gene03219.t1	Sp1	GGGCGG	431	6	+	Oryza sativa	light responsive
PH02Gene03219.t1	Sp1	GGGCGG	595	6	+	Oryza sativa	light responsive
PH02Gene03219.t1	A-box	CCGTCC	499	6	+	Petroselinum crispum	plant growth and development
PH02Gene03219.t1	CAT-box	GCCACT	483	6	+	Arabidopsis thaliana	plant growth and development
PH02Gene03219.t1	CAT-box	GCCACT	938	6	-	Arabidopsis thaliana	plant growth and development
PH02Gene03219.t1	O2-site	GATGATGTGG	165	9	+	Zea mays	plant growth and development
PH02Gene03219.t1	MBS	CAACTG	635	6	+	Arabidopsis thaliana	stess responsive
PH02Gene03219.t1	GC-motif	CCCCCG	469	6	+	Zea mays	stress responsive
PH02Gene03219.t1	GC-motif	CCCCCG	616	6	-	Zea mays	stress responsive
PH02Gene03219.t1	GC-motif	CCCCCG	1192	6	+	Zea mays	stress responsive
PH02Gene03219.t1	GC-motif	CCCCCG	1616	6	-	Zea mays	stress responsive
PH02Gene03219.t1	ARE	AAACCA	929	6	+	Zea mays	stress responsive
PH02Gene03219.t1	ARE	AAACCA	1275	6	+	Zea mays	stress responsive
PH02Gene03219.t1	TC-rich repeats	GTTTTCTTAC	1729	9	+	Nicotiana tabacum	stress responsive
PH02Gene03546.t1	AT-rich sequence	TAAAATACT	817	9	+	Pisum sativum	element for maximal elicitor-mediated activation (2copies)
PH02Gene03546.t1	TCA-element	TCAGAAGAGG	1423	9	-	Brassica oleracea	hormone responsive
PH02Gene03546.t1	ABRE	AACCCGG	502	7	-	Arabidopsis thaliana	hormone responsive
PH02Gene03546.t1	ABRE	ACGTG	842	5	+	Arabidopsis thaliana	hormone responsive
PH02Gene03546.t1	CGTCA-motif	CGTCA	262	5	+	Hordeum vulgare	hormone responsive
PH02Gene03546.t1	CGTCA-motif	CGTCA	840	5	-	Hordeum vulgare	hormone responsive
PH02Gene03546.t1	CGTCA-motif	CGTCA	1490	5	-	Hordeum vulgare	hormone responsive
PH02Gene03546.t1	TGACG-motif	TGACG	262	5	-	Hordeum vulgare	hormone responsive
PH02Gene03546.t1	TGACG-motif	TGACG	840	5	+	Hordeum vulgare	hormone responsive
PH02Gene03546.t1	TGACG-motif	TGACG	1490	5	+	Hordeum vulgare	hormone responsive
PH02Gene03546.t1	ERE	ATTTTAAA	1506	8	+	Nicotiana glutinos	hormone responsive
PH02Gene03546.t1	CAAT-box	CAAAT	4	5	-	Pisum sativum	light responsive
PH02Gene03546.t1	CAAT-box	CAAAT	11	5	+	Pisum sativum	light responsive
PH02Gene03546.t1	CAAT-box	CAAAT	117	5	-	Pisum sativum	light responsive
PH02Gene03546.t1	CAAT-box	CAAAT	182	5	-	Pisum sativum	light responsive
PH02Gene03546.t1	CAAT-box	CAAAT	195	5	-	Pisum sativum	light responsive
PH02Gene03546.t1	CAAT-box	CAAAT	247	5	-	Pisum sativum	light responsive
PH02Gene03546.t1	CAAT-box	CAAAT	1064	5	+	Pisum sativum	light responsive
PH02Gene03546.t1	CAAT-box	CCAAT	1111	5	+	Arabidopsis thaliana	light responsive
PH02Gene03546.t1	CAAT-box	CAAAT	1128	5	-	Pisum sativum	light responsive
PH02Gene03546.t1	CAAT-box	CAAAT	1165	5	+	Pisum sativum	light responsive
PH02Gene03546.t1	CAAT-box	CCAAT	1219	5	-	Arabidopsis thaliana	light responsive
PH02Gene03546.t1	CAAT-box	CAAAT	1263	5	-	Pisum sativum	light responsive
PH02Gene03546.t1	CAAT-box	CAAAT	1527	5	+	Pisum sativum	light responsive
PH02Gene03546.t1	CAAT-box	CAAAT	1563	5	+	Pisum sativum	light responsive
PH02Gene03546.t1	CAAT-box	CAAAT	1906	5	+	Pisum sativum	light responsive
PH02Gene03546.t1	CAAT-box	CCAAT	1974	5	+	Arabidopsis thaliana	light responsive
PH02Gene03546.t1	Box 4	ATTAAT	1021	6	-	Petroselinum crispum	light responsive
PH02Gene03546.t1	G-box	CACGAC	350	6	+	Zea mays	light responsive
PH02Gene03546.t1	G-box	CACGTC	841	6	-	Zea mays	light responsive
PH02Gene03546.t1	GTGGC-motif	GATTCTGTGGC	1449	10	-	Spinacia oleracea	light responsive
PH02Gene03546.t1	LAMP-element	CTTTATCA	740	8	+	Pisum sativum	light responsive
PH02Gene03546.t1	A-box	CCGTCC	1518	6	+	Petroselinum crispum	plant growth and development
PH02Gene03546.t1	GC-motif	CCCCCG	1403	6	+	Zea mays	stress responsive
PH02Gene03546.t1	ARE	AAACCA	922	6	-	Zea mays	stress responsive
PH02Gene03675.t1	TGA-element	AACGAC	1301	6	-	Brassica oleracea	hormone responsive
PH02Gene03675.t1	TGA-element	AACGAC	1949	6	-	Brassica oleracea	hormone responsive
PH02Gene03675.t1	TCA-element	CCATCTTTTT	210	9	-	Nicotiana tabacum	hormone responsive
PH02Gene03675.t1	ABRE	GCAACGTGTC	82	9	-	Hordeum vulgare	hormone responsive
PH02Gene03675.t1	ABRE	ACGTG	84	5	-	Arabidopsis thaliana	hormone responsive
PH02Gene03675.t1	ABRE	AACCCGG	1662	7	+	Arabidopsis thaliana	hormone responsive
PH02Gene03675.t1	ABRE	CACGTG	1799	6	-	Arabidopsis thaliana	hormone responsive
PH02Gene03675.t1	ABRE	ACGTG	1800	5	+	Arabidopsis thaliana	hormone responsive
PH02Gene03675.t1	CGTCA-motif	CGTCA	206	5	+	Hordeum vulgare	hormone responsive
PH02Gene03675.t1	CGTCA-motif	CGTCA	749	5	+	Hordeum vulgare	hormone responsive
PH02Gene03675.t1	CGTCA-motif	CGTCA	1557	5	+	Hordeum vulgare	hormone responsive
PH02Gene03675.t1	CGTCA-motif	CGTCA	1784	5	+	Hordeum vulgare	hormone responsive
PH02Gene03675.t1	TGACG-motif	TGACG	206	5	-	Hordeum vulgare	hormone responsive
PH02Gene03675.t1	TGACG-motif	TGACG	749	5	-	Hordeum vulgare	hormone responsive
PH02Gene03675.t1	TGACG-motif	TGACG	1557	5	-	Hordeum vulgare	hormone responsive
PH02Gene03675.t1	TGACG-motif	TGACG	1784	5	-	Hordeum vulgare	hormone responsive
PH02Gene03675.t1	CAAT-box	CAAAT	52	5	-	Pisum sativum	light responsive
PH02Gene03675.t1	CAAT-box	CAAAT	92	5	+	Pisum sativum	light responsive
PH02Gene03675.t1	CAAT-box	CAAAT	95	5	-	Pisum sativum	light responsive
PH02Gene03675.t1	CAAT-box	CCAAT	238	5	+	Arabidopsis thaliana	light responsive
PH02Gene03675.t1	CAAT-box	CCAAT	262	5	-	Arabidopsis thaliana	light responsive
PH02Gene03675.t1	CAAT-box	CAAAT	386	5	-	Pisum sativum	light responsive
PH02Gene03675.t1	CAAT-box	CAAAT	593	5	+	Pisum sativum	light responsive
PH02Gene03675.t1	CAAT-box	CAAAT	793	5	+	Pisum sativum	light responsive
PH02Gene03675.t1	CAAT-box	CCAAT	796	5	-	Arabidopsis thaliana	light responsive
PH02Gene03675.t1	CAAT-box	CCAAT	840	5	-	Arabidopsis thaliana	light responsive
PH02Gene03675.t1	CAAT-box	CAAAT	874	5	+	Pisum sativum	light responsive
PH02Gene03675.t1	CAAT-box	CCAAT	946	5	-	Arabidopsis thaliana	light responsive
PH02Gene03675.t1	CAAT-box	CCAAT	1151	5	-	Arabidopsis thaliana	light responsive
PH02Gene03675.t1	CAAT-box	CCAAT	1509	5	+	Arabidopsis thaliana	light responsive
PH02Gene03675.t1	CAAT-box	CCAAT	1757	5	+	Arabidopsis thaliana	light responsive
PH02Gene03675.t1	chs-CMA	GAACCTACACAC	852	11	-	Hordeum vulgare	light responsive
PH02Gene03675.t1	G-box	CACGAC	536	6	-	Zea mays	light responsive
PH02Gene03675.t1	G-box	CACGAC	1728	6	+	Zea mays	light responsive
PH02Gene03675.t1	G-box	CACGTG	1799	6	-	Arabidopsis thaliana	light responsive
PH02Gene03675.t1	G-Box	CACGTT	84	6	+	Pisum sativum	light responsive
PH02Gene03675.t1	G-Box	TCCACATGGCA	548	10	+	Triticum aestivum	light responsive
PH02Gene03675.t1	G-Box	TCCACATGGCA	611	10	+	Triticum aestivum	light responsive
PH02Gene03675.t1	G-Box	CACGTG	1799	6	-	Pisum sativum	light responsive
PH02Gene03675.t1	GTGGC-motif	CAGCGTGTGGC	289	10	-	Hordeum vulgare	light responsive
PH02Gene03675.t1	I-box	gGATAAGGTG	828	9	+	Zea mays	light responsive
PH02Gene03675.t1	MRE	AACCTAA	1980	7	-	Petroselinum crispum	light responsive
PH02Gene03675.t1	MRE	AACCTAA	1985	7	-	Petroselinum crispum	light responsive
PH02Gene03675.t1	TCCC-motif	TCTCCCT	1836	7	-	Spinacia oleracea	light responsive
PH02Gene03675.t1	AE-box	AGAAACAA	441	8	+	Arabidopsis thaliana	light responsive
PH02Gene03675.t1	CCAAT-box	CAACGG	636	6	-	Hordeum vulgare	MYBHv1 binding site
PH02Gene03675.t1	CCAAT-box	CAACGG	1713	6	+	Hordeum vulgare	MYBHv1 binding site
PH02Gene03675.t1	MSA-like	(T/C)C(T/C)AACGG(T/C)(T/C)A	1711	9	+	Catharanthus roseus	plant growth and development
PH02Gene03675.t1	A-box	CCGTCC	1696	6	+	Petroselinum crispum	plant growth and development
PH02Gene03675.t1	CAT-box	GCCACT	421	6	+	Arabidopsis thaliana	plant growth and development
PH02Gene03675.t1	GCN4_motif	TGAGTCA	1628	7	+	Oryza sativa	plant growth and development
PH02Gene03675.t1	MBSI	aaaAaaC(G/C)GTTA	1159	11	-	Petunia hybrida	plant growth and development
PH02Gene03675.t1	O2-site	GTTGACGTGA	893	9	+	Zea mays	plant growth and development
PH02Gene03675.t1	WUN-motif	AAATTACT	650	8	+	Nicotiana glutinosa	stess responsive
PH02Gene03675.t1	WUN-motif	AAATTACT	1061	8	-	Nicotiana glutinosa	stess responsive
PH02Gene03675.t1	ARE	AAACCA	939	6	-	Zea mays	stress responsive
PH02Gene03675.t1	ARE	AAACCA	1326	6	+	Zea mays	stress responsive
PH02Gene03675.t1	ARE	AAACCA	1618	6	+	Zea mays	stress responsive
PH02Gene03675.t1	ARE	AAACCA	1960	6	+	Zea mays	stress responsive
PH02Gene03770.t1	TGA-element	AACGAC	575	6	+	Brassica oleracea	hormone responsive
PH02Gene03770.t1	ABRE	ACGTG	346	5	+	Arabidopsis thaliana	hormone responsive
PH02Gene03770.t1	CGTCA-motif	CGTCA	584	5	-	Hordeum vulgare	hormone responsive
PH02Gene03770.t1	CGTCA-motif	CGTCA	649	5	-	Hordeum vulgare	hormone responsive
PH02Gene03770.t1	CGTCA-motif	CGTCA	761	5	-	Hordeum vulgare	hormone responsive
PH02Gene03770.t1	TGACG-motif	TGACG	584	5	+	Hordeum vulgare	hormone responsive
PH02Gene03770.t1	TGACG-motif	TGACG	649	5	+	Hordeum vulgare	hormone responsive
PH02Gene03770.t1	TGACG-motif	TGACG	761	5	+	Hordeum vulgare	hormone responsive
PH02Gene03770.t1	GARE-motif	TCTGTTG	1124	7	-	Brassica oleracea	hormone responsive
PH02Gene03770.t1	CAAT-box	CAAAT	111	5	+	Pisum sativum	light responsive
PH02Gene03770.t1	CAAT-box	CCAAT	276	5	+	Arabidopsis thaliana	light responsive
PH02Gene03770.t1	CAAT-box	CCAAT	283	5	-	Arabidopsis thaliana	light responsive
PH02Gene03770.t1	CAAT-box	CAAAT	440	5	-	Pisum sativum	light responsive
PH02Gene03770.t1	CAAT-box	CAAAT	532	5	-	Pisum sativum	light responsive
PH02Gene03770.t1	CAAT-box	CCAAT	714	5	-	Arabidopsis thaliana	light responsive
PH02Gene03770.t1	CAAT-box	CAAAT	723	5	-	Pisum sativum	light responsive
PH02Gene03770.t1	CAAT-box	CCAAT	752	5	-	Arabidopsis thaliana	light responsive
PH02Gene03770.t1	CAAT-box	CAAAT	758	5	-	Pisum sativum	light responsive
PH02Gene03770.t1	CAAT-box	CAAAT	888	5	+	Pisum sativum	light responsive
PH02Gene03770.t1	CAAT-box	CCAAT	1310	5	+	Arabidopsis thaliana	light responsive
PH02Gene03770.t1	CAAT-box	CAAAT	1420	5	+	Pisum sativum	light responsive
PH02Gene03770.t1	CAAT-box	CAAAT	1423	5	-	Pisum sativum	light responsive
PH02Gene03770.t1	CAAT-box	CAAAT	1493	5	+	Pisum sativum	light responsive
PH02Gene03770.t1	CAAT-box	CCAAT	1588	5	+	Arabidopsis thaliana	light responsive
PH02Gene03770.t1	CAAT-box	CCAAT	1639	5	-	Arabidopsis thaliana	light responsive
PH02Gene03770.t1	CAAT-box	CAAAT	1834	5	+	Pisum sativum	light responsive
PH02Gene03770.t1	CAAT-box	CAAAT	1851	5	+	Pisum sativum	light responsive
PH02Gene03770.t1	CAAT-box	CAAAT	1954	5	-	Pisum sativum	light responsive
PH02Gene03770.t1	Box 4	ATTAAT	686	6	+	Petroselinum crispum	light responsive
PH02Gene03770.t1	Box 4	ATTAAT	807	6	+	Petroselinum crispum	light responsive
PH02Gene03770.t1	GATA-motif	GATAGGG	50	7	+	Pisum sativum	light responsive
PH02Gene03770.t1	G-box	TACGTG	345	6	+	Arabidopsis thaliana	light responsive
PH02Gene03770.t1	GT1-motif	GGTTAAT	942	7	+	Avena sativa	light responsive
PH02Gene03770.t1	GT1-motif	GGTTAA	1942	6	-	Arabidopsis thaliana	light responsive
PH02Gene03770.t1	MRE	AACCTAA	57	7	-	Petroselinum crispum	light responsive
PH02Gene03770.t1	TCT-motif	TCTTAC	356	6	-	Arabidopsis thaliana	light responsive
PH02Gene03770.t1	MBS	CAACTG	645	6	-	Arabidopsis thaliana	stess responsive
PH02Gene03770.t1	WUN-motif	AAATTACTA	872	9	+	Nicotiana glutinosa	stess responsive
PH02Gene03770.t1	WUN-motif	TTATTACAT	948	9	+	Nicotiana glutinosa	stess responsive
PH02Gene03770.t1	WUN-motif	AAATTTCTT	1184	9	-	Nicotiana glutinosa	stess responsive
PH02Gene03770.t1	ARE	AAACCA	261	6	-	Zea mays	stress responsive
PH02Gene03770.t1	ARE	AAACCA	847	6	+	Zea mays	stress responsive
PH02Gene03770.t1	ARE	AAACCA	1910	6	-	Zea mays	stress responsive
PH02Gene03770.t1	ARE	AAACCA	1990	6	-	Zea mays	stress responsive
PH02Gene03822.t1	ABRE	ACGTG	986	5	-	Arabidopsis thaliana	hormone responsive
PH02Gene03822.t1	ABRE	ACGTG	1622	5	-	Arabidopsis thaliana	hormone responsive
PH02Gene03822.t1	CGTCA-motif	CGTCA	228	5	-	Hordeum vulgare	hormone responsive
PH02Gene03822.t1	CGTCA-motif	CGTCA	313	5	-	Hordeum vulgare	hormone responsive
PH02Gene03822.t1	CGTCA-motif	CGTCA	890	5	-	Hordeum vulgare	hormone responsive
PH02Gene03822.t1	CGTCA-motif	CGTCA	905	5	-	Hordeum vulgare	hormone responsive
PH02Gene03822.t1	CGTCA-motif	CGTCA	1376	5	+	Hordeum vulgare	hormone responsive
PH02Gene03822.t1	TGACG-motif	TGACG	228	5	+	Hordeum vulgare	hormone responsive
PH02Gene03822.t1	TGACG-motif	TGACG	313	5	+	Hordeum vulgare	hormone responsive
PH02Gene03822.t1	TGACG-motif	TGACG	890	5	+	Hordeum vulgare	hormone responsive
PH02Gene03822.t1	TGACG-motif	TGACG	905	5	+	Hordeum vulgare	hormone responsive
PH02Gene03822.t1	TGACG-motif	TGACG	1376	5	-	Hordeum vulgare	hormone responsive
PH02Gene03822.t1	CAAT-box	CCAAT	9	5	-	Arabidopsis thaliana	light responsive
PH02Gene03822.t1	CAAT-box	CAAAT	346	5	-	Pisum sativum	light responsive
PH02Gene03822.t1	CAAT-box	CAAAT	352	5	-	Pisum sativum	light responsive
PH02Gene03822.t1	CAAT-box	CAAAT	383	5	-	Pisum sativum	light responsive
PH02Gene03822.t1	CAAT-box	CCAAT	416	5	-	Arabidopsis thaliana	light responsive
PH02Gene03822.t1	CAAT-box	CCAAT	421	5	-	Arabidopsis thaliana	light responsive
PH02Gene03822.t1	CAAT-box	CCAAT	432	5	-	Arabidopsis thaliana	light responsive
PH02Gene03822.t1	CAAT-box	CAAAT	441	5	-	Pisum sativum	light responsive
PH02Gene03822.t1	CAAT-box	CAAAT	496	5	-	Pisum sativum	light responsive
PH02Gene03822.t1	CAAT-box	CAAAT	595	5	+	Pisum sativum	light responsive
PH02Gene03822.t1	CAAT-box	CCAAT	622	5	-	Arabidopsis thaliana	light responsive
PH02Gene03822.t1	CAAT-box	CAAAT	655	5	+	Pisum sativum	light responsive
PH02Gene03822.t1	CAAT-box	CAAAT	884	5	-	Pisum sativum	light responsive
PH02Gene03822.t1	CAAT-box	CAAAT	1096	5	+	Pisum sativum	light responsive
PH02Gene03822.t1	CAAT-box	CCAAT	1129	5	+	Arabidopsis thaliana	light responsive
PH02Gene03822.t1	CAAT-box	CAAAT	1278	5	-	Pisum sativum	light responsive
PH02Gene03822.t1	CAAT-box	CAAAT	1346	5	-	Pisum sativum	light responsive
PH02Gene03822.t1	CAAT-box	CCAAT	1468	5	+	Arabidopsis thaliana	light responsive
PH02Gene03822.t1	CAAT-box	CAAAT	1808	5	-	Pisum sativum	light responsive
PH02Gene03822.t1	CAAT-box	CCAAT	1914	5	-	Arabidopsis thaliana	light responsive
PH02Gene03822.t1	CAAT-box	CCAAT	1967	5	-	Arabidopsis thaliana	light responsive
PH02Gene03822.t1	ACE	GCGACGTACC	889	9	+	Petroselinum crispum	light responsive
PH02Gene03822.t1	ATCT-motif	AATCTAATCC	48	9	+	Pisum sativum	light responsive
PH02Gene03822.t1	G-Box	CACGTT	986	6	+	Pisum sativum	light responsive
PH02Gene03822.t1	G-Box	CACGTT	1622	6	+	Pisum sativum	light responsive
PH02Gene03822.t1	G-box	CACGAC	169	6	+	Zea mays	light responsive
PH02Gene03822.t1	I-box	cCATATCCAAT	421	10	-	Flaveria trinervia	light responsive
PH02Gene03822.t1	TCT-motif	TCTTAC	1154	6	+	Arabidopsis thaliana	light responsive
PH02Gene03822.t1	TCT-motif	TCTTAC	1191	6	+	Arabidopsis thaliana	light responsive
PH02Gene03822.t1	TCT-motif	TCTTAC	1199	6	+	Arabidopsis thaliana	light responsive
PH02Gene03822.t1	TCT-motif	TCTTAC	1220	6	+	Arabidopsis thaliana	light responsive
PH02Gene03822.t1	AE-box	AGAAACAA	1048	8	+	Arabidopsis thaliana	light responsive
PH02Gene03822.t1	CCAAT-box	CAACGG	772	6	+	Hordeum vulgare	MYBHv1 binding site
PH02Gene03822.t1	CAT-box	GCCACT	936	6	-	Arabidopsis thaliana	plant growth and development
PH02Gene03822.t1	CAT-box	GCCACT	1020	6	+	Arabidopsis thaliana	plant growth and development
PH02Gene03822.t1	O2-site	GATGACATGG	42	9	-	Zea mays	plant growth and development
PH02Gene03822.t1	WUN-motif	AAATTACTA	947	9	-	Nicotiana glutinosa	stess responsive
PH02Gene03822.t1	WUN-motif	AAATTACT	948	8	-	Nicotiana glutinosa	stess responsive
PH02Gene03822.t1	LTR	CCGAAA	1271	6	-	Hordeum vulgare	stress responsive
PH02Gene03822.t1	GC-motif	CCCCCG	217	6	-	Zea mays	stress responsive
PH02Gene03822.t1	ARE	AAACCA	82	6	-	Zea mays	stress responsive
PH02Gene03822.t1	ARE	AAACCA	1983	6	-	Zea mays	stress responsive
PH02Gene04759.t1	TATC-box	TATCCCA	621	7	+	Oryza sativa	hormone responsive
PH02Gene04759.t1	TCA-element	TCAGAAGAGG	25	9	+	Brassica oleracea	hormone responsive
PH02Gene04759.t1	TCA-element	CCATCTTTTT	436	9	-	Nicotiana tabacum	hormone responsive
PH02Gene04759.t1	TCA-element	CCATCTTTTT	1116	9	+	Nicotiana tabacum	hormone responsive
PH02Gene04759.t1	TCA-element	CCATCTTTTT	1136	9	+	Nicotiana tabacum	hormone responsive
PH02Gene04759.t1	ABRE	ACGTG	771	5	-	Arabidopsis thaliana	hormone responsive
PH02Gene04759.t1	ABRE	CACGTG	1505	6	-	Arabidopsis thaliana	hormone responsive
PH02Gene04759.t1	ABRE	ACGTG	1506	5	+	Arabidopsis thaliana	hormone responsive
PH02Gene04759.t1	ABRE	ACGTG	1513	5	-	Arabidopsis thaliana	hormone responsive
PH02Gene04759.t1	CGTCA-motif	CGTCA	1676	5	-	Hordeum vulgare	hormone responsive
PH02Gene04759.t1	CGTCA-motif	CGTCA	1825	5	-	Hordeum vulgare	hormone responsive
PH02Gene04759.t1	TGACG-motif	TGACG	1676	5	+	Hordeum vulgare	hormone responsive
PH02Gene04759.t1	TGACG-motif	TGACG	1825	5	+	Hordeum vulgare	hormone responsive
PH02Gene04759.t1	CAAT-box	CAAAT	139	5	-	Pisum sativum	light responsive
PH02Gene04759.t1	CAAT-box	CAACCAACTCC	412	10	-	Arabidopsis thaliana	light responsive
PH02Gene04759.t1	CAAT-box	TGCCAAC	590	7	-	Petunia hybrida	light responsive
PH02Gene04759.t1	CAAT-box	CCAAT	1210	5	+	Arabidopsis thaliana	light responsive
PH02Gene04759.t1	CAAT-box	CCAAT	1230	5	+	Arabidopsis thaliana	light responsive
PH02Gene04759.t1	GATA-motif	GATAGGA	263	7	+	Arabidopsis thaliana	light responsive
PH02Gene04759.t1	G-box	CACGAC	582	6	-	Zea mays	light responsive
PH02Gene04759.t1	G-box	TACGTG	771	6	-	Arabidopsis thaliana	light responsive
PH02Gene04759.t1	G-box	CACGTG	1505	6	-	Arabidopsis thaliana	light responsive
PH02Gene04759.t1	G-box	CACGTC	1513	6	+	Zea mays	light responsive
PH02Gene04759.t1	G-Box	CACGTG	1505	6	-	Pisum sativum	light responsive
PH02Gene04759.t1	I-box	cGATAAGGCG	1933	9	+	Zea mays	light responsive
PH02Gene04759.t1	Sp1	GGGCGG	1205	6	-	Oryza sativa	light responsive
PH02Gene04759.t1	Sp1	GGGCGG	1276	6	-	Oryza sativa	light responsive
PH02Gene04759.t1	Sp1	GGGCGG	1525	6	-	Oryza sativa	light responsive
PH02Gene04759.t1	Sp1	GGGCGG	1616	6	+	Oryza sativa	light responsive
PH02Gene04759.t1	Sp1	GGGCGG	1708	6	+	Oryza sativa	light responsive
PH02Gene04759.t1	Sp1	GGGCGG	1765	6	+	Oryza sativa	light responsive
PH02Gene04759.t1	Sp1	GGGCGG	1857	6	+	Oryza sativa	light responsive
PH02Gene04759.t1	TCCC-motif	TCTCCCT	1254	7	+	Spinacia oleracea	light responsive
PH02Gene04759.t1	CAT-box	GCCACT	409	6	-	Arabidopsis thaliana	plant growth and development
PH02Gene04759.t1	CAT-box	GCCACT	1324	6	+	Arabidopsis thaliana	plant growth and development
PH02Gene04759.t1	O2-site	GATGATGTGG	185	9	+	Zea mays	plant growth and development
PH02Gene04759.t1	O2-site	GTTGACGTGA	1240	9	-	Zea mays	plant growth and development
PH02Gene04759.t1	GC-motif	CCCCCG	1288	6	+	Zea mays	stress responsive
PH02Gene04759.t1	ARE	AAACCA	713	6	-	Zea mays	stress responsive
PH02Gene04759.t1	ARE	AAACCA	1394	6	-	Zea mays	stress responsive
PH02Gene04759.t1	TC-rich repeats	GTTTTCTTAC	680	9	+	Nicotiana tabacum	stress responsive
PH02Gene05210.t1	TCA-element	TCAGAAGAGG	1447	9	-	Brassica oleracea	hormone responsive
PH02Gene05210.t1	ABRE	ACGTG	1212	5	-	Arabidopsis thaliana	hormone responsive
PH02Gene05210.t1	ABRE	AACCCGG	1295	7	+	Arabidopsis thaliana	hormone responsive
PH02Gene05210.t1	AuxRR-core	GGTCCAT	614	7	-	Nicotiana tabacum	hormone responsive
PH02Gene05210.t1	CGTCA-motif	CGTCA	1926	5	-	Hordeum vulgare	hormone responsive
PH02Gene05210.t1	CGTCA-motif	CGTCA	1968	5	-	Hordeum vulgare	hormone responsive
PH02Gene05210.t1	TGACG-motif	TGACG	1926	5	+	Hordeum vulgare	hormone responsive
PH02Gene05210.t1	TGACG-motif	TGACG	1968	5	+	Hordeum vulgare	hormone responsive
PH02Gene05210.t1	CAAT-box	CAAAT	44	5	+	Pisum sativum	light responsive
PH02Gene05210.t1	CAAT-box	CAAAT	114	5	+	Pisum sativum	light responsive
PH02Gene05210.t1	CAAT-box	CCAAT	405	5	+	Arabidopsis thaliana	light responsive
PH02Gene05210.t1	CAAT-box	CCAAT	417	5	+	Arabidopsis thaliana	light responsive
PH02Gene05210.t1	CAAT-box	CAAAT	611	5	+	Pisum sativum	light responsive
PH02Gene05210.t1	CAAT-box	CAAAT	796	5	-	Pisum sativum	light responsive
PH02Gene05210.t1	CAAT-box	CAAAT	810	5	+	Pisum sativum	light responsive
PH02Gene05210.t1	CAAT-box	TGCCAAC	874	7	-	Petunia hybrida	light responsive
PH02Gene05210.t1	CAAT-box	CAAAT	971	5	-	Pisum sativum	light responsive
PH02Gene05210.t1	CAAT-box	CAAAT	978	5	+	Pisum sativum	light responsive
PH02Gene05210.t1	CAAT-box	CAAAT	1062	5	-	Pisum sativum	light responsive
PH02Gene05210.t1	CAAT-box	CAAAT	1101	5	+	Pisum sativum	light responsive
PH02Gene05210.t1	CAAT-box	CAAAT	1137	5	+	Pisum sativum	light responsive
PH02Gene05210.t1	CAAT-box	CCAAT	1165	5	+	Arabidopsis thaliana	light responsive
PH02Gene05210.t1	CAAT-box	CCAAT	1253	5	+	Arabidopsis thaliana	light responsive
PH02Gene05210.t1	CAAT-box	CAAAT	1372	5	-	Pisum sativum	light responsive
PH02Gene05210.t1	Box 4	ATTAAT	635	6	+	Petroselinum crispum	light responsive
PH02Gene05210.t1	chs-CMA	GAACCTACACAC	1946	11	-	Hordeum vulgare	light responsive
PH02Gene05210.t1	G-box	CACGAC	530	6	-	Zea mays	light responsive
PH02Gene05210.t1	G-Box	CACGTT	1212	6	+	Pisum sativum	light responsive
PH02Gene05210.t1	GT1-motif	GGTTAA	413	6	-	Arabidopsis thaliana	light responsive
PH02Gene05210.t1	I-box	cCATATCCAAT	1469	10	+	Flaveria trinervia	light responsive
PH02Gene05210.t1	TCCC-motif	TCTCCCT	1443	7	+	Spinacia oleracea	light responsive
PH02Gene05210.t1	AE-box	AGAAACAA	60	8	-	Arabidopsis thaliana	light responsive
PH02Gene05210.t1	CCAAT-box	CAACGG	1877	6	-	Hordeum vulgare	MYBHv1 binding site
PH02Gene05210.t1	CAT-box	GCCACT	1672	6	-	Arabidopsis thaliana	plant growth and development
PH02Gene05210.t1	O2-site	GATGA(C/T)(A/G)TG(A/G)	1600	8	-	Zea mays	plant growth and development
PH02Gene05210.t1	MBS	CAACTG	467	6	+	Arabidopsis thaliana	stess responsive
PH02Gene05210.t1	MBS	CAACTG	872	6	-	Arabidopsis thaliana	stess responsive
PH02Gene05210.t1	MBS	CAACTG	1514	6	-	Arabidopsis thaliana	stess responsive
PH02Gene05210.t1	WUN-motif	TAATTACTC	591	9	-	Nicotiana glutinosa	stess responsive
PH02Gene05210.t1	WUN-motif	AAATTACT	967	8	-	Nicotiana glutinosa	stess responsive
PH02Gene05257.t1	TGA-element	AACGAC	898	6	+	Brassica oleracea	hormone responsive
PH02Gene05257.t1	ABRE	GCCGCGTGGC	1544	9	-	Oryza sativa	hormone responsive
PH02Gene05257.t1	CGTCA-motif	CGTCA	1255	5	-	Hordeum vulgare	hormone responsive
PH02Gene05257.t1	CGTCA-motif	CGTCA	1572	5	-	Hordeum vulgare	hormone responsive
PH02Gene05257.t1	CGTCA-motif	CGTCA	1694	5	-	Hordeum vulgare	hormone responsive
PH02Gene05257.t1	CGTCA-motif	CGTCA	1964	5	+	Hordeum vulgare	hormone responsive
PH02Gene05257.t1	CGTCA-motif	CGTCA	1987	5	+	Hordeum vulgare	hormone responsive
PH02Gene05257.t1	TGACG-motif	TGACG	1255	5	+	Hordeum vulgare	hormone responsive
PH02Gene05257.t1	TGACG-motif	TGACG	1572	5	+	Hordeum vulgare	hormone responsive
PH02Gene05257.t1	TGACG-motif	TGACG	1694	5	+	Hordeum vulgare	hormone responsive
PH02Gene05257.t1	TGACG-motif	TGACG	1964	5	-	Hordeum vulgare	hormone responsive
PH02Gene05257.t1	TGACG-motif	TGACG	1987	5	-	Hordeum vulgare	hormone responsive
PH02Gene05257.t1	GARE-motif	TCTGTTG	842	7	-	Brassica oleracea	hormone responsive
PH02Gene05257.t1	CAAT-box	CCAAT	60	5	-	Arabidopsis thaliana	light responsive
PH02Gene05257.t1	CAAT-box	CCAAT	454	5	-	Arabidopsis thaliana	light responsive
PH02Gene05257.t1	CAAT-box	CAAAT	732	5	-	Pisum sativum	light responsive
PH02Gene05257.t1	CAAT-box	CAAAT	813	5	-	Pisum sativum	light responsive
PH02Gene05257.t1	CAAT-box	CAAAT	933	5	+	Pisum sativum	light responsive
PH02Gene05257.t1	CAAT-box	CAAAT	1164	5	+	Pisum sativum	light responsive
PH02Gene05257.t1	CAAT-box	CCAAT	1437	5	+	Arabidopsis thaliana	light responsive
PH02Gene05257.t1	CAAT-box	CAAAT	1725	5	+	Pisum sativum	light responsive
PH02Gene05257.t1	CAAT-box	CCAAT	1902	5	+	Arabidopsis thaliana	light responsive
PH02Gene05257.t1	CAAT-box	CAAAT	1972	5	-	Pisum sativum	light responsive
PH02Gene05257.t1	ATC-motif	TGCTATCCA	695	9	+	Pisum sativum	light responsive
PH02Gene05257.t1	Box 4	ATTAAT	954	6	+	Petroselinum crispum	light responsive
PH02Gene05257.t1	Box 4	ATTAAT	1012	6	-	Petroselinum crispum	light responsive
PH02Gene05257.t1	C-box	ACGAGCACCGCC	1761	11	+	Hordeum vulgare	light responsive
PH02Gene05257.t1	GATA-motif	AAGGATAAGG	581	9	+	Solanum tuberosum	light responsive
PH02Gene05257.t1	G-box	CACGAC	1171	6	-	Zea mays	light responsive
PH02Gene05257.t1	G-box	CACGAC	1222	6	+	Zea mays	light responsive
PH02Gene05257.t1	G-box	CACGAC	1266	6	-	Zea mays	light responsive
PH02Gene05257.t1	G-box	CACGAC	1305	6	+	Zea mays	light responsive
PH02Gene05257.t1	I-box	gGATAAGGTG	1094	9	+	Zea mays	light responsive
PH02Gene05257.t1	LAMP-element	CCTTATCCA	1093	9	-	Spinacia oleracea	light responsive
PH02Gene05257.t1	Sp1	GGGCGG	1183	6	+	Oryza sativa	light responsive
PH02Gene05257.t1	Sp1	GGGCGG	1521	6	+	Oryza sativa	light responsive
PH02Gene05257.t1	AE-box	AGAAACAA	1974	8	-	Arabidopsis thaliana	light responsive
PH02Gene05257.t1	HD-Zip 1	CAAT(A/T)ATTG	762	8.5	+	Arabidopsis thaliana	plant growth and development
PH02Gene05257.t1	MBS	CAACTG	1937	6	+	Arabidopsis thaliana	stess responsive
PH02Gene05257.t1	WUN-motif	CAATTACAT	712	9	-	Nicotiana glutinosa	stess responsive
PH02Gene05257.t1	WUN-motif	CCATTTCAA	870	9	-	Nicotiana glutinosa	stess responsive
PH02Gene05520.t1	ERE	ATTTCATA	65	8	+	Nicotiana glutinos	hormone responsive
PH02Gene05520.t1	CAAT-box	CAAAT	62	5	+	Pisum sativum	light responsive
PH02Gene05520.t1	CAAT-box	CAAAT	369	5	-	Pisum sativum	light responsive
PH02Gene05520.t1	CAAT-box	CAAAT	488	5	+	Pisum sativum	light responsive
PH02Gene05520.t1	CAAT-box	CAAAT	910	5	+	Pisum sativum	light responsive
PH02Gene05520.t1	CAAT-box	CCAAT	968	5	-	Arabidopsis thaliana	light responsive
PH02Gene05520.t1	CAAT-box	TGCCAAC	1087	7	-	Petunia hybrida	light responsive
PH02Gene05520.t1	CAAT-box	CAAAT	1143	5	+	Pisum sativum	light responsive
PH02Gene05520.t1	CAAT-box	CAAAT	1226	5	-	Pisum sativum	light responsive
PH02Gene05520.t1	CAAT-box	CCAAT	1314	5	-	Arabidopsis thaliana	light responsive
PH02Gene05520.t1	CAAT-box	CCAAT	1323	5	+	Arabidopsis thaliana	light responsive
PH02Gene05520.t1	CAAT-box	CCAAT	1701	5	+	Arabidopsis thaliana	light responsive
PH02Gene05520.t1	Box 4	ATTAAT	1577	6	-	Petroselinum crispum	light responsive
PH02Gene05520.t1	G-box	CACGAC	1748	6	+	Zea mays	light responsive
PH02Gene05520.t1	GT1-motif	GGTTAAT	841	7	-	Avena sativa	light responsive
PH02Gene05520.t1	GT1-motif	GGTTAA	842	6	-	Arabidopsis thaliana	light responsive
PH02Gene05520.t1	I-box	GTATAAGGCC	818	9	-	Larix laricina	light responsive
PH02Gene05520.t1	Sp1	GGGCGG	1715	6	-	Oryza sativa	light responsive
PH02Gene05520.t1	MBS	CAACTG	282	6	-	Arabidopsis thaliana	stess responsive
PH02Gene05520.t1	MBS	CAACTG	1662	6	+	Arabidopsis thaliana	stess responsive
PH02Gene05520.t1	GC-motif	CCCCCG	1288	6	+	Zea mays	stress responsive
PH02Gene05520.t1	ARE	AAACCA	906	6	+	Zea mays	stress responsive
PH02Gene05520.t1	ARE	AAACCA	1645	6	+	Zea mays	stress responsive
PH02Gene05520.t1	ARE	AAACCA	1764	6	+	Zea mays	stress responsive
PH02Gene06110.t1	TGA-element	AACGAC	991	6	-	Brassica oleracea	hormone responsive
PH02Gene06110.t1	TCA-element	CCATCTTTTT	1443	9	-	Nicotiana tabacum	hormone responsive
PH02Gene06110.t1	ABRE	ACGTG	712	5	-	Arabidopsis thaliana	hormone responsive
PH02Gene06110.t1	ABRE	ACGTG	1264	5	+	Arabidopsis thaliana	hormone responsive
PH02Gene06110.t1	ABRE	CACGTG	1812	6	-	Arabidopsis thaliana	hormone responsive
PH02Gene06110.t1	ABRE	ACGTG	1813	5	+	Arabidopsis thaliana	hormone responsive
PH02Gene06110.t1	CGTCA-motif	CGTCA	714	5	+	Hordeum vulgare	hormone responsive
PH02Gene06110.t1	CGTCA-motif	CGTCA	1199	5	-	Hordeum vulgare	hormone responsive
PH02Gene06110.t1	CGTCA-motif	CGTCA	1318	5	-	Hordeum vulgare	hormone responsive
PH02Gene06110.t1	CGTCA-motif	CGTCA	1653	5	+	Hordeum vulgare	hormone responsive
PH02Gene06110.t1	TGACG-motif	TGACG	714	5	-	Hordeum vulgare	hormone responsive
PH02Gene06110.t1	TGACG-motif	TGACG	1199	5	+	Hordeum vulgare	hormone responsive
PH02Gene06110.t1	TGACG-motif	TGACG	1318	5	+	Hordeum vulgare	hormone responsive
PH02Gene06110.t1	TGACG-motif	TGACG	1653	5	-	Hordeum vulgare	hormone responsive
PH02Gene06110.t1	P-box	CCTTTTG	959	7	+	Oryza sativa	hormone responsive
PH02Gene06110.t1	CAAT-box	CCAAT	117	5	-	Arabidopsis thaliana	light responsive
PH02Gene06110.t1	CAAT-box	CCAAT	252	5	-	Arabidopsis thaliana	light responsive
PH02Gene06110.t1	CAAT-box	CCAAT	343	5	-	Arabidopsis thaliana	light responsive
PH02Gene06110.t1	CAAT-box	CCAAT	499	5	-	Arabidopsis thaliana	light responsive
PH02Gene06110.t1	CAAT-box	CAAAT	574	5	+	Pisum sativum	light responsive
PH02Gene06110.t1	CAAT-box	CAAAT	622	5	+	Pisum sativum	light responsive
PH02Gene06110.t1	CAAT-box	CAAAT	744	5	-	Pisum sativum	light responsive
PH02Gene06110.t1	CAAT-box	CAAAT	943	5	-	Pisum sativum	light responsive
PH02Gene06110.t1	CAAT-box	CAAAT	1544	5	-	Pisum sativum	light responsive
PH02Gene06110.t1	CAAT-box	CAAAT	1735	5	+	Pisum sativum	light responsive
PH02Gene06110.t1	CAAT-box	CCAAT	1784	5	+	Arabidopsis thaliana	light responsive
PH02Gene06110.t1	Box II	CCACGTGGC	1811	9	+	Petroselinum crispum	light responsive
PH02Gene06110.t1	Gap-box	CAAATGAA(A/G)A	622	9.5	+	Arabidopsis thaliana	light responsive
PH02Gene06110.t1	G-box	CACGTC	712	6	+	Zea mays	light responsive
PH02Gene06110.t1	G-box	CACGAC	1045	6	+	Zea mays	light responsive
PH02Gene06110.t1	G-box	GCCACGTGGA	1810	9	-	Arabidopsis thaliana	light responsive
PH02Gene06110.t1	G-box	CACGTG	1812	6	-	Arabidopsis thaliana	light responsive
PH02Gene06110.t1	G-Box	TCCACATGGCA	850	10	-	Triticum aestivum	light responsive
PH02Gene06110.t1	G-Box	CACGTT	1263	6	-	Pisum sativum	light responsive
PH02Gene06110.t1	G-Box	CACGTG	1812	6	-	Pisum sativum	light responsive
PH02Gene06110.t1	GT1-motif	GGTTAAT	1883	7	-	Avena sativa	light responsive
PH02Gene06110.t1	GT1-motif	GGTTAA	1884	6	-	Arabidopsis thaliana	light responsive
PH02Gene06110.t1	I-box	cGATAAGGCG	316	9	+	Zea mays	light responsive
PH02Gene06110.t1	Sp1	GGGCGG	207	6	+	Oryza sativa	light responsive
PH02Gene06110.t1	AE-box	AGAAACTT	1214	8	-	Arabidopsis thaliana	light responsive
PH02Gene06110.t1	CCAAT-box	CAACGG	1889	6	+	Hordeum vulgare	MYBHv1 binding site
PH02Gene06110.t1	MSA-like	(T/C)C(T/C)AACGG(T/C)(T/C)A	1581	8.5	-	Catharanthus roseus	plant growth and development
PH02Gene06110.t1	MBS	CAACTG	1947	6	+	Arabidopsis thaliana	stess responsive
PH02Gene06110.t1	ARE	AAACCA	18	6	+	Zea mays	stress responsive
PH02Gene06110.t1	ARE	AAACCA	1367	6	+	Zea mays	stress responsive
PH02Gene06110.t1	ARE	AAACCA	1723	6	+	Zea mays	stress responsive
PH02Gene07322.t1	TGA-element	AACGAC	989	6	+	Brassica oleracea	hormone responsive
PH02Gene07322.t1	TGA-element	AACGAC	1102	6	+	Brassica oleracea	hormone responsive
PH02Gene07322.t1	ABRE	GCAACGTGTC	240	9	-	Hordeum vulgare	hormone responsive
PH02Gene07322.t1	ABRE	ACGTG	1106	5	+	Arabidopsis thaliana	hormone responsive
PH02Gene07322.t1	ABRE	ACGTG	1473	5	-	Arabidopsis thaliana	hormone responsive
PH02Gene07322.t1	CGTCA-motif	CGTCA	490	5	-	Hordeum vulgare	hormone responsive
PH02Gene07322.t1	CGTCA-motif	CGTCA	667	5	-	Hordeum vulgare	hormone responsive
PH02Gene07322.t1	TGACG-motif	TGACG	490	5	+	Hordeum vulgare	hormone responsive
PH02Gene07322.t1	TGACG-motif	TGACG	667	5	+	Hordeum vulgare	hormone responsive
PH02Gene07322.t1	GARE-motif	TCTGTTG	234	7	+	Brassica oleracea	hormone responsive
PH02Gene07322.t1	P-box	CCTTTTG	1349	7	-	Oryza sativa	hormone responsive
PH02Gene07322.t1	P-box	CCTTTTG	1538	7	-	Oryza sativa	hormone responsive
PH02Gene07322.t1	ERE	ATTTTAAA	1295	8	+	Nicotiana glutinos	hormone responsive
PH02Gene07322.t1	CAAT-box	TGCCAAC	305	7	+	Petunia hybrida	light responsive
PH02Gene07322.t1	CAAT-box	CCAAT	566	5	-	Arabidopsis thaliana	light responsive
PH02Gene07322.t1	CAAT-box	CCAAT	881	5	-	Arabidopsis thaliana	light responsive
PH02Gene07322.t1	CAAT-box	CAAAT	962	5	-	Pisum sativum	light responsive
PH02Gene07322.t1	CAAT-box	CAAAT	1259	5	-	Pisum sativum	light responsive
PH02Gene07322.t1	CAAT-box	CCAAT	1789	5	+	Arabidopsis thaliana	light responsive
PH02Gene07322.t1	CAAT-box	CCAAT	1889	5	+	Arabidopsis thaliana	light responsive
PH02Gene07322.t1	G-box	CACGTC	1105	6	-	Zea mays	light responsive
PH02Gene07322.t1	G-box	TACGTG	1473	6	-	Arabidopsis thaliana	light responsive
PH02Gene07322.t1	G-box	CACGAC	1606	6	-	Zea mays	light responsive
PH02Gene07322.t1	GT1-motif	GGTTAA	776	6	-	Arabidopsis thaliana	light responsive
PH02Gene07322.t1	I-box	cCATATCCAAT	566	10	-	Flaveria trinervia	light responsive
PH02Gene07322.t1	Sp1	GGGCGG	1354	6	+	Oryza sativa	light responsive
PH02Gene07322.t1	CCAAT-box	CAACGG	543	6	+	Hordeum vulgare	MYBHv1 binding site
PH02Gene07322.t1	CCAAT-box	CAACGG	1647	6	+	Hordeum vulgare	MYBHv1 binding site
PH02Gene07322.t1	MSA-like	TCCAACGGT	541	9	+	Catharanthus roseus	plant growth and development
PH02Gene07322.t1	A-box	CCGTCC	528	6	+	Petroselinum crispum	plant growth and development
PH02Gene07322.t1	A-box	CCGTCC	767	6	-	Petroselinum crispum	plant growth and development
PH02Gene07322.t1	A-box	CCGTCC	1777	6	+	Petroselinum crispum	plant growth and development
PH02Gene07322.t1	CAT-box	GCCACT	910	6	-	Arabidopsis thaliana	plant growth and development
PH02Gene07322.t1	O2-site	GATGACATGG	1505	9	-	Zea mays	plant growth and development
PH02Gene07322.t1	MBS	CAACTG	703	6	-	Arabidopsis thaliana	stess responsive
PH02Gene07322.t1	LTR	CCGAAA	1439	6	+	Hordeum vulgare	stress responsive
PH02Gene07322.t1	LTR	CCGAAA	1690	6	+	Hordeum vulgare	stress responsive
PH02Gene07322.t1	ARE	AAACCA	736	6	-	Zea mays	stress responsive
PH02Gene07322.t1	ARE	AAACCA	1502	6	+	Zea mays	stress responsive
PH02Gene07322.t1	ARE	AAACCA	1634	6	+	Zea mays	stress responsive
PH02Gene07322.t1	ARE	AAACCA	1693	6	+	Zea mays	stress responsive
PH02Gene07322.t1	ARE	AAACCA	1701	6	+	Zea mays	stress responsive
PH02Gene07653.t1	TGA-element	AACGAC	132	6	-	Brassica oleracea	hormone responsive
PH02Gene07653.t1	TGA-element	AACGAC	564	6	+	Brassica oleracea	hormone responsive
PH02Gene07653.t1	TGA-element	AACGAC	1900	6	+	Brassica oleracea	hormone responsive
PH02Gene07653.t1	TCA-element	CCATCTTTTT	982	9	-	Nicotiana tabacum	hormone responsive
PH02Gene07653.t1	TCA-element	CCATCTTTTT	1246	9	+	Nicotiana tabacum	hormone responsive
PH02Gene07653.t1	TCA-element	CCATCTTTTT	1265	9	+	Nicotiana tabacum	hormone responsive
PH02Gene07653.t1	ABRE	GCCGCGTGGC	240	9	+	Oryza sativa	hormone responsive
PH02Gene07653.t1	ABRE	GCCGCGTGGC	275	9	+	Oryza sativa	hormone responsive
PH02Gene07653.t1	ABRE	ACGTG	719	5	+	Arabidopsis thaliana	hormone responsive
PH02Gene07653.t1	ABRE	AACCCGG	1628	7	-	Arabidopsis thaliana	hormone responsive
PH02Gene07653.t1	AuxRR-core	GGTCCAT	465	7	-	Nicotiana tabacum	hormone responsive
PH02Gene07653.t1	CAAT-box	CCAAT	907	5	-	Arabidopsis thaliana	light responsive
PH02Gene07653.t1	CAAT-box	CAAAT	967	5	-	Pisum sativum	light responsive
PH02Gene07653.t1	CAAT-box	CCAAT	995	5	-	Arabidopsis thaliana	light responsive
PH02Gene07653.t1	CAAT-box	CCAAT	1341	5	+	Arabidopsis thaliana	light responsive
PH02Gene07653.t1	CAAT-box	CCAAT	1361	5	+	Arabidopsis thaliana	light responsive
PH02Gene07653.t1	G-box	CACGAC	268	6	+	Zea mays	light responsive
PH02Gene07653.t1	G-box	CACGAC	531	6	-	Zea mays	light responsive
PH02Gene07653.t1	G-box	CACGAC	657	6	-	Zea mays	light responsive
PH02Gene07653.t1	G-box	CACGAC	707	6	-	Zea mays	light responsive
PH02Gene07653.t1	G-box	TACGTG	718	6	+	Arabidopsis thaliana	light responsive
PH02Gene07653.t1	G-box	CACGAC	851	6	+	Zea mays	light responsive
PH02Gene07653.t1	I-box	gGATAAGGTG	297	9	-	Zea mays	light responsive
PH02Gene07653.t1	Sp1	GGGCGG	327	6	+	Oryza sativa	light responsive
PH02Gene07653.t1	Sp1	GGGCGG	1336	6	-	Oryza sativa	light responsive
PH02Gene07653.t1	Sp1	GGGCGG	1662	6	-	Oryza sativa	light responsive
PH02Gene07653.t1	Sp1	GGGCGG	1779	6	+	Oryza sativa	light responsive
PH02Gene07653.t1	TCCC-motif	TCTCCCT	1385	7	+	Spinacia oleracea	light responsive
PH02Gene07653.t1	TCT-motif	TCTTAC	962	6	-	Arabidopsis thaliana	light responsive
PH02Gene07653.t1	CCAAT-box	CAACGG	856	6	-	Hordeum vulgare	MYBHv1 binding site
PH02Gene07653.t1	A-box	CCGTCC	342	6	-	Petroselinum crispum	plant growth and development
PH02Gene07653.t1	A-box	CCGTCC	680	6	-	Petroselinum crispum	plant growth and development
PH02Gene07653.t1	MBS	CAACTG	953	6	+	Arabidopsis thaliana	stess responsive
PH02Gene07653.t1	GC-motif	AGCGCGCCG	281	9	-	Oryza sativa	stress responsive
PH02Gene07653.t1	GC-motif	AGCGCGCCG	1948	9	+	Oryza sativa	stress responsive
PH02Gene07653.t1	GC-motif	CCCCCG	732	6	-	Zea mays	stress responsive
PH02Gene07653.t1	ARE	AAACCA	1519	6	-	Zea mays	stress responsive
PH02Gene07884.t2	TGA-element	AACGAC	2	6	+	Brassica oleracea	hormone responsive
PH02Gene07884.t2	TCA-element	CCATCTTTTT	1924	9	+	Nicotiana tabacum	hormone responsive
PH02Gene07884.t2	ABRE	ACGTG	585	5	+	Arabidopsis thaliana	hormone responsive
PH02Gene07884.t2	CAAT-box	CCAAT	44	5	-	Arabidopsis thaliana	light responsive
PH02Gene07884.t2	CAAT-box	CAAAT	123	5	-	Pisum sativum	light responsive
PH02Gene07884.t2	CAAT-box	CAAAT	313	5	-	Pisum sativum	light responsive
PH02Gene07884.t2	CAAT-box	CCAAT	546	5	+	Arabidopsis thaliana	light responsive
PH02Gene07884.t2	CAAT-box	CAAAT	713	5	+	Pisum sativum	light responsive
PH02Gene07884.t2	CAAT-box	CCAAT	1287	5	-	Arabidopsis thaliana	light responsive
PH02Gene07884.t2	CAAT-box	CAAAT	1422	5	-	Pisum sativum	light responsive
PH02Gene07884.t2	CAAT-box	CCAAT	1462	5	-	Arabidopsis thaliana	light responsive
PH02Gene07884.t2	CAAT-box	CAAAT	1473	5	-	Pisum sativum	light responsive
PH02Gene07884.t2	CAAT-box	CCAAT	1525	5	-	Arabidopsis thaliana	light responsive
PH02Gene07884.t2	CAAT-box	CCAAT	1622	5	-	Arabidopsis thaliana	light responsive
PH02Gene07884.t2	CAAT-box	CAAAT	1673	5	-	Pisum sativum	light responsive
PH02Gene07884.t2	CAAT-box	CAAAT	1962	5	-	Pisum sativum	light responsive
PH02Gene07884.t2	G-box	CACGAC	388	6	-	Zea mays	light responsive
PH02Gene07884.t2	G-box	CACGTC	584	6	-	Zea mays	light responsive
PH02Gene07884.t2	GT1-motif	GGTTAA	537	6	+	Arabidopsis thaliana	light responsive
PH02Gene07884.t2	MRE	AACCTAA	1814	7	-	Petroselinum crispum	light responsive
PH02Gene07884.t2	TCT-motif	TCTTAC	1883	6	+	Arabidopsis thaliana	light responsive
PH02Gene07884.t2	A-box	CCGTCC	976	6	+	Petroselinum crispum	plant growth and development
PH02Gene07884.t2	O2-site	GATGA(C/T)(A/G)TG(A/G)	401	8	+	Zea mays	plant growth and development
PH02Gene07884.t2	MBS	CAACTG	441	6	+	Arabidopsis thaliana	stess responsive
PH02Gene07884.t2	MBS	CAACTG	967	6	-	Arabidopsis thaliana	stess responsive
PH02Gene07884.t2	WUN-motif	AAATTTCCT	1311	9	+	Brassica oleracea	stess responsive
PH02Gene07884.t2	ARE	AAACCA	543	6	+	Zea mays	stress responsive
PH02Gene07884.t2	ARE	AAACCA	622	6	-	Zea mays	stress responsive
PH02Gene07884.t2	ARE	AAACCA	1517	6	-	Zea mays	stress responsive
PH02Gene07884.t2	TC-rich repeats	ATTCTCTAAC	348	9	+	Nicotiana tabacum	stress responsive
PH02Gene07967.t1	AuxRR-core	GGTCCAT	803	7	-	Nicotiana tabacum	hormone responsive
PH02Gene07967.t1	GARE-motif	TCTGTTG	1206	7	+	Brassica oleracea	hormone responsive
PH02Gene07967.t1	GARE-motif	TCTGTTG	1778	7	-	Brassica oleracea	hormone responsive
PH02Gene07967.t1	P-box	CCTTTTG	890	7	-	Oryza sativa	hormone responsive
PH02Gene07967.t1	CAAT-box	CAAAT	177	5	+	Pisum sativum	light responsive
PH02Gene07967.t1	CAAT-box	CCAAT	222	5	+	Arabidopsis thaliana	light responsive
PH02Gene07967.t1	CAAT-box	CCAAT	514	5	+	Arabidopsis thaliana	light responsive
PH02Gene07967.t1	CAAT-box	CAAAT	590	5	+	Pisum sativum	light responsive
PH02Gene07967.t1	CAAT-box	CAAAT	628	5	-	Pisum sativum	light responsive
PH02Gene07967.t1	CAAT-box	CCAAT	794	5	-	Arabidopsis thaliana	light responsive
PH02Gene07967.t1	CAAT-box	CAAAT	835	5	-	Pisum sativum	light responsive
PH02Gene07967.t1	CAAT-box	CAAAT	1022	5	+	Pisum sativum	light responsive
PH02Gene07967.t1	CAAT-box	CAAAT	1260	5	+	Pisum sativum	light responsive
PH02Gene07967.t1	CAAT-box	CAAAT	1294	5	-	Pisum sativum	light responsive
PH02Gene07967.t1	CAAT-box	CAAAT	1337	5	-	Pisum sativum	light responsive
PH02Gene07967.t1	CAAT-box	TGCCAAC	1347	7	-	Petunia hybrida	light responsive
PH02Gene07967.t1	CAAT-box	CAAAT	1474	5	+	Pisum sativum	light responsive
PH02Gene07967.t1	CAAT-box	CCAAT	1522	5	-	Arabidopsis thaliana	light responsive
PH02Gene07967.t1	CAAT-box	CCAAT	1554	5	+	Arabidopsis thaliana	light responsive
PH02Gene07967.t1	CAAT-box	TGCCAAC	1593	7	+	Petunia hybrida	light responsive
PH02Gene07967.t1	CAAT-box	CAAAT	1629	5	+	Pisum sativum	light responsive
PH02Gene07967.t1	CAAT-box	CAAAT	1656	5	-	Pisum sativum	light responsive
PH02Gene07967.t1	CAAT-box	CCAAT	1859	5	-	Arabidopsis thaliana	light responsive
PH02Gene07967.t1	Box 4	ATTAAT	353	6	+	Petroselinum crispum	light responsive
PH02Gene07967.t1	Box 4	ATTAAT	1610	6	-	Petroselinum crispum	light responsive
PH02Gene07967.t1	GT1-motif	GGTTAA	1101	6	+	Arabidopsis thaliana	light responsive
PH02Gene07967.t1	GT1-motif	GGTTAAT	1748	7	-	Avena sativa	light responsive
PH02Gene07967.t1	GT1-motif	GGTTAA	1749	6	-	Arabidopsis thaliana	light responsive
PH02Gene07967.t1	I-box	gGATAAGGTG	1678	9	-	Zea mays	light responsive
PH02Gene07967.t1	Sp1	GGGCGG	469	6	-	Oryza sativa	light responsive
PH02Gene07967.t1	Sp1	GGGCGG	1989	6	-	Oryza sativa	light responsive
PH02Gene07967.t1	A-box	CCGTCC	1699	6	+	Petroselinum crispum	plant growth and development
PH02Gene07967.t1	MBS	CAACTG	1006	6	-	Arabidopsis thaliana	stess responsive
PH02Gene07967.t1	LTR	CCGAAA	827	6	+	Hordeum vulgare	stress responsive
PH02Gene08110.t1	TGA-element	AACGAC	164	6	-	Brassica oleracea	hormone responsive
PH02Gene08110.t1	TGA-element	AACGAC	210	6	-	Brassica oleracea	hormone responsive
PH02Gene08110.t1	TGA-element	AACGAC	582	6	-	Brassica oleracea	hormone responsive
PH02Gene08110.t1	ABRE	ACGTG	55	5	-	Arabidopsis thaliana	hormone responsive
PH02Gene08110.t1	ABRE	TACGGTC	566	7	-	Arabidopsis thaliana	hormone responsive
PH02Gene08110.t1	ABRE	GACACGTGGC	1460	9	-	Triticum aestivum	hormone responsive
PH02Gene08110.t1	ABRE	CACGTG	1462	6	-	Arabidopsis thaliana	hormone responsive
PH02Gene08110.t1	ABRE	ACGTG	1463	5	+	Arabidopsis thaliana	hormone responsive
PH02Gene08110.t1	ABRE	GCCGCGTGGC	1471	9	-	Oryza sativa	hormone responsive
PH02Gene08110.t1	ABRE	AACCCGG	1506	7	+	Arabidopsis thaliana	hormone responsive
PH02Gene08110.t1	CGTCA-motif	CGTCA	603	5	-	Hordeum vulgare	hormone responsive
PH02Gene08110.t1	CGTCA-motif	CGTCA	924	5	-	Hordeum vulgare	hormone responsive
PH02Gene08110.t1	CGTCA-motif	CGTCA	1870	5	-	Hordeum vulgare	hormone responsive
PH02Gene08110.t1	TGACG-motif	TGACG	603	5	+	Hordeum vulgare	hormone responsive
PH02Gene08110.t1	TGACG-motif	TGACG	924	5	+	Hordeum vulgare	hormone responsive
PH02Gene08110.t1	TGACG-motif	TGACG	1870	5	+	Hordeum vulgare	hormone responsive
PH02Gene08110.t1	CAAT-box	CAAAT	101	5	+	Pisum sativum	light responsive
PH02Gene08110.t1	CAAT-box	CAAAT	175	5	+	Pisum sativum	light responsive
PH02Gene08110.t1	CAAT-box	CAAAT	261	5	+	Pisum sativum	light responsive
PH02Gene08110.t1	CAAT-box	CAAAT	424	5	-	Pisum sativum	light responsive
PH02Gene08110.t1	CAAT-box	CCAAT	468	5	-	Arabidopsis thaliana	light responsive
PH02Gene08110.t1	CAAT-box	CAAAT	500	5	+	Pisum sativum	light responsive
PH02Gene08110.t1	CAAT-box	CAAAT	846	5	-	Pisum sativum	light responsive
PH02Gene08110.t1	CAAT-box	CCAAT	1035	5	-	Arabidopsis thaliana	light responsive
PH02Gene08110.t1	CAAT-box	CAAAT	1538	5	+	Pisum sativum	light responsive
PH02Gene08110.t1	Box 4	ATTAAT	104	6	+	Petroselinum crispum	light responsive
PH02Gene08110.t1	Box 4	ATTAAT	896	6	+	Petroselinum crispum	light responsive
PH02Gene08110.t1	Box 4	ATTAAT	1239	6	-	Petroselinum crispum	light responsive
PH02Gene08110.t1	chs-CMA	ACCTAACCCGC	1785	10	+	Hordeum vulgare	light responsive
PH02Gene08110.t1	G-box	CACGAC	542	6	-	Zea mays	light responsive
PH02Gene08110.t1	G-box	CACGAC	613	6	+	Zea mays	light responsive
PH02Gene08110.t1	G-box	CACGTG	1462	6	-	Arabidopsis thaliana	light responsive
PH02Gene08110.t1	G-Box	CACGTT	55	6	+	Pisum sativum	light responsive
PH02Gene08110.t1	G-Box	CACGTG	1462	6	-	Pisum sativum	light responsive
PH02Gene08110.t1	GT1-motif	GGTTAAT	906	7	+	Avena sativa	light responsive
PH02Gene08110.t1	TCCC-motif	TCTCCCT	1916	7	+	Spinacia oleracea	light responsive
PH02Gene08110.t1	TCCC-motif	TCTCCCT	1922	7	+	Spinacia oleracea	light responsive
PH02Gene08110.t1	TCCC-motif	TCTCCCT	1928	7	+	Spinacia oleracea	light responsive
PH02Gene08110.t1	CCAAT-box	CAACGG	1259	6	-	Hordeum vulgare	MYBHv1 binding site
PH02Gene08110.t1	MSA-like	TCCAACGGT	1258	9	-	Catharanthus roseus	plant growth and development
PH02Gene08110.t1	O2-site	GATGA(C/T)(A/G)TG(A/G)	24	8	+	Zea mays	plant growth and development
PH02Gene08110.t1	O2-site	GTTGACGTGA	1868	9	+	Zea mays	plant growth and development
PH02Gene08110.t1	LTR	CCGAAA	753	6	-	Hordeum vulgare	stress responsive
PH02Gene08110.t1	LTR	CCGAAA	1420	6	+	Hordeum vulgare	stress responsive
PH02Gene08110.t1	LTR	CCGAAA	1531	6	+	Hordeum vulgare	stress responsive
PH02Gene08110.t1	GC-motif	CCCCCG	998	6	-	Zea mays	stress responsive
PH02Gene08110.t1	GC-motif	CCCCCG	1523	6	+	Zea mays	stress responsive
PH02Gene08110.t1	ARE	AAACCA	470	6	-	Zea mays	stress responsive
PH02Gene08110.t1	ARE	AAACCA	1037	6	-	Zea mays	stress responsive
PH02Gene09364.t1	TGA-element	AACGAC	61	6	+	Brassica oleracea	hormone responsive
PH02Gene09364.t1	TGA-element	AACGAC	1662	6	-	Brassica oleracea	hormone responsive
PH02Gene09364.t1	TGA-element	AACGAC	1869	6	+	Brassica oleracea	hormone responsive
PH02Gene09364.t1	ABRE	ACGTG	1857	5	-	Arabidopsis thaliana	hormone responsive
PH02Gene09364.t1	CGTCA-motif	CGTCA	973	5	-	Hordeum vulgare	hormone responsive
PH02Gene09364.t1	CGTCA-motif	CGTCA	1458	5	+	Hordeum vulgare	hormone responsive
PH02Gene09364.t1	TGACG-motif	TGACG	973	5	+	Hordeum vulgare	hormone responsive
PH02Gene09364.t1	TGACG-motif	TGACG	1458	5	-	Hordeum vulgare	hormone responsive
PH02Gene09364.t1	CAAT-box	CAAAT	617	5	+	Pisum sativum	light responsive
PH02Gene09364.t1	CAAT-box	CAAAT	898	5	+	Pisum sativum	light responsive
PH02Gene09364.t1	CAAT-box	CAAAT	938	5	-	Pisum sativum	light responsive
PH02Gene09364.t1	CAAT-box	CAAAT	1007	5	-	Pisum sativum	light responsive
PH02Gene09364.t1	CAAT-box	CAAAT	1231	5	-	Pisum sativum	light responsive
PH02Gene09364.t1	CAAT-box	CAAAT	1376	5	-	Pisum sativum	light responsive
PH02Gene09364.t1	CAAT-box	CAAAT	1402	5	+	Pisum sativum	light responsive
PH02Gene09364.t1	CAAT-box	CCAAT	1616	5	-	Arabidopsis thaliana	light responsive
PH02Gene09364.t1	CAAT-box	CCAAT	1737	5	+	Arabidopsis thaliana	light responsive
PH02Gene09364.t1	CAAT-box	CAAAT	1848	5	-	Pisum sativum	light responsive
PH02Gene09364.t1	CAAT-box	CAAAT	1954	5	-	Pisum sativum	light responsive
PH02Gene09364.t1	ATCT-motif	AATCTAATCC	675	9	-	Pisum sativum	light responsive
PH02Gene09364.t1	G-box	TACGTG	1857	6	-	Arabidopsis thaliana	light responsive
PH02Gene09364.t1	MRE	AACCTAA	808	7	-	Petroselinum crispum	light responsive
PH02Gene09364.t1	Sp1	GGGCGG	199	6	-	Oryza sativa	light responsive
PH02Gene09364.t1	TCCC-motif	TCTCCCT	162	7	-	Spinacia oleracea	light responsive
PH02Gene09364.t1	TCCC-motif	TCTCCCT	256	7	+	Spinacia oleracea	light responsive
PH02Gene09364.t1	CAG-motif	GAAAGGCAGAC	491	10	-	Arabidopsis thaliana	light responsive
PH02Gene09364.t1	AE-box	AGAAACTT	1837	8	-	Arabidopsis thaliana	light responsive
PH02Gene09364.t1	A-box	CCGTCC	883	6	-	Petroselinum crispum	plant growth and development
PH02Gene09364.t1	CAT-box	GCCACT	1356	6	-	Arabidopsis thaliana	plant growth and development
PH02Gene09364.t1	GCN4_motif	TGAGTCA	1067	7	-	Oryza sativa	plant growth and development
PH02Gene09364.t1	MBS	CAACTG	1267	6	+	Arabidopsis thaliana	stess responsive
PH02Gene09364.t1	MBS	CAACTG	1555	6	+	Arabidopsis thaliana	stess responsive
PH02Gene09364.t1	GC-motif	AGCGCGCCG	280	9	-	Oryza sativa	stress responsive
PH02Gene09364.t1	GC-motif	CCCCCG	209	6	+	Zea mays	stress responsive
PH02Gene09364.t1	GC-motif	CCCCCG	236	6	+	Zea mays	stress responsive
PH02Gene09364.t1	ARE	AAACCA	73	6	+	Zea mays	stress responsive
PH02Gene09465.t1	TCA-element	CCATCTTTTT	952	9	+	Nicotiana tabacum	hormone responsive
PH02Gene09465.t1	TCA-element	TCAGAAGAGG	1420	9	-	Brassica oleracea	hormone responsive
PH02Gene09465.t1	TCA-element	TCAGAAGAGG	1654	9	+	Brassica oleracea	hormone responsive
PH02Gene09465.t1	ABRE	ACGTG	682	5	+	Arabidopsis thaliana	hormone responsive
PH02Gene09465.t1	ABRE	CACGTG	1181	6	-	Arabidopsis thaliana	hormone responsive
PH02Gene09465.t1	ABRE	ACGTG	1182	5	+	Arabidopsis thaliana	hormone responsive
PH02Gene09465.t1	P-box	CCTTTTG	1486	7	+	Oryza sativa	hormone responsive
PH02Gene09465.t1	ERE	ATTTTAAA	235	8	-	Nicotiana glutinos	hormone responsive
PH02Gene09465.t1	CAAT-box	CAAAT	131	5	+	Pisum sativum	light responsive
PH02Gene09465.t1	CAAT-box	CAAAT	180	5	-	Pisum sativum	light responsive
PH02Gene09465.t1	CAAT-box	CAAAT	185	5	-	Pisum sativum	light responsive
PH02Gene09465.t1	CAAT-box	CAAAT	292	5	+	Pisum sativum	light responsive
PH02Gene09465.t1	CAAT-box	CCAAT	312	5	-	Arabidopsis thaliana	light responsive
PH02Gene09465.t1	CAAT-box	CCAAT	339	5	-	Arabidopsis thaliana	light responsive
PH02Gene09465.t1	CAAT-box	CCAAT	532	5	+	Arabidopsis thaliana	light responsive
PH02Gene09465.t1	CAAT-box	CCAAT	1442	5	-	Arabidopsis thaliana	light responsive
PH02Gene09465.t1	CAAT-box	CAAAT	1526	5	+	Pisum sativum	light responsive
PH02Gene09465.t1	CAAT-box	CAAAT	1536	5	-	Pisum sativum	light responsive
PH02Gene09465.t1	CAAT-box	CAAAT	1612	5	+	Pisum sativum	light responsive
PH02Gene09465.t1	CAAT-box	CAAAT	1633	5	-	Pisum sativum	light responsive
PH02Gene09465.t1	CAAT-box	CAAAT	1648	5	-	Pisum sativum	light responsive
PH02Gene09465.t1	CAAT-box	CAAAT	1705	5	+	Pisum sativum	light responsive
PH02Gene09465.t1	Box 4	ATTAAT	308	6	+	Petroselinum crispum	light responsive
PH02Gene09465.t1	Box 4	ATTAAT	987	6	+	Petroselinum crispum	light responsive
PH02Gene09465.t1	Box 4	ATTAAT	991	6	+	Petroselinum crispum	light responsive
PH02Gene09465.t1	Box 4	ATTAAT	995	6	+	Petroselinum crispum	light responsive
PH02Gene09465.t1	Box 4	ATTAAT	999	6	-	Petroselinum crispum	light responsive
PH02Gene09465.t1	Box II	CCACGTGGC	1179	9	-	Petroselinum crispum	light responsive
PH02Gene09465.t1	chs-CMA	TTACTTAA	980	8	+	Daucus carota	light responsive
PH02Gene09465.t1	G-Box	CACGTG	1181	6	-	Pisum sativum	light responsive
PH02Gene09465.t1	G-box	TACGTG	681	6	+	Arabidopsis thaliana	light responsive
PH02Gene09465.t1	G-box	GCCACGTGGA	1179	10	+	Arabidopsis thaliana	light responsive
PH02Gene09465.t1	G-box	CACGTG	1181	6	-	Arabidopsis thaliana	light responsive
PH02Gene09465.t1	GT1-motif	GGTTAAT	687	7	-	Avena sativa	light responsive
PH02Gene09465.t1	GT1-motif	GGTTAA	688	6	-	Arabidopsis thaliana	light responsive
PH02Gene09465.t1	Sp1	GGGCGG	1049	6	-	Oryza sativa	light responsive
PH02Gene09465.t1	Sp1	GGGCGG	1135	6	-	Oryza sativa	light responsive
PH02Gene09465.t1	TCT-motif	TCTTAC	1962	6	+	Arabidopsis thaliana	light responsive
PH02Gene09465.t1	A-box	CCGTCC	1285	6	+	Petroselinum crispum	plant growth and development
PH02Gene09465.t1	circadian	CAAAGATATC	478	9	-	Lycopersicon esculentum	plant growth and development
PH02Gene09465.t1	GCN4_motif	TGAGTCA	1607	7	+	Oryza sativa	plant growth and development
PH02Gene09465.t1	O2-site	GATGA(C/T)(A/G)TG(A/G)	176	8	+	Zea mays	plant growth and development
PH02Gene09465.t1	GC-motif	CCCCCG	1010	6	+	Zea mays	stress responsive
PH02Gene09465.t1	GC-motif	CCCCCG	1139	6	+	Zea mays	stress responsive
PH02Gene09465.t1	ARE	AAACCA	390	6	-	Zea mays	stress responsive
PH02Gene09465.t1	ARE	AAACCA	518	6	+	Zea mays	stress responsive
PH02Gene09465.t1	ARE	AAACCA	562	6	-	Zea mays	stress responsive
PH02Gene09465.t1	TC-rich repeats	GTTTTCTTAC	674	9	+	Nicotiana tabacum	stress responsive
PH02Gene10845.t1	TGA-element	AACGAC	510	6	+	Brassica oleracea	hormone responsive
PH02Gene10845.t1	TGA-element	AACGAC	1799	6	+	Brassica oleracea	hormone responsive
PH02Gene10845.t1	TCA-element	CCATCTTTTT	354	9	-	Nicotiana tabacum	hormone responsive
PH02Gene10845.t1	ABRE	ACGTG	1375	5	-	Arabidopsis thaliana	hormone responsive
PH02Gene10845.t1	ABRE	GACACGTGGC	1742	9	-	Triticum aestivum	hormone responsive
PH02Gene10845.t1	ABRE	CACGTG	1744	6	-	Arabidopsis thaliana	hormone responsive
PH02Gene10845.t1	ABRE	ACGTG	1745	5	+	Arabidopsis thaliana	hormone responsive
PH02Gene10845.t1	ABRE	GCCGCGTGGC	1749	9	-	Oryza sativa	hormone responsive
PH02Gene10845.t1	CGTCA-motif	CGTCA	1894	5	+	Hordeum vulgare	hormone responsive
PH02Gene10845.t1	TGACG-motif	TGACG	1894	5	-	Hordeum vulgare	hormone responsive
PH02Gene10845.t1	GARE-motif	TCTGTTG	790	7	-	Brassica oleracea	hormone responsive
PH02Gene10845.t1	CAAT-box	CAAAT	183	5	+	Pisum sativum	light responsive
PH02Gene10845.t1	CAAT-box	CAAAT	411	5	-	Pisum sativum	light responsive
PH02Gene10845.t1	CAAT-box	CAAAT	474	5	+	Pisum sativum	light responsive
PH02Gene10845.t1	CAAT-box	CAAAT	594	5	+	Pisum sativum	light responsive
PH02Gene10845.t1	CAAT-box	CCAAT	606	5	+	Arabidopsis thaliana	light responsive
PH02Gene10845.t1	CAAT-box	CCAAT	740	5	-	Arabidopsis thaliana	light responsive
PH02Gene10845.t1	CAAT-box	CAAAT	780	5	-	Pisum sativum	light responsive
PH02Gene10845.t1	CAAT-box	CCAAT	1040	5	-	Arabidopsis thaliana	light responsive
PH02Gene10845.t1	CAAT-box	CCAAT	1070	5	+	Arabidopsis thaliana	light responsive
PH02Gene10845.t1	CAAT-box	CCAAT	1137	5	+	Arabidopsis thaliana	light responsive
PH02Gene10845.t1	CAAT-box	CAAAT	1698	5	+	Pisum sativum	light responsive
PH02Gene10845.t1	Box 4	ATTAAT	1026	6	-	Petroselinum crispum	light responsive
PH02Gene10845.t1	Box 4	ATTAAT	1092	6	-	Petroselinum crispum	light responsive
PH02Gene10845.t1	Box 4	ATTAAT	1235	6	-	Petroselinum crispum	light responsive
PH02Gene10845.t1	chs-CMA	TTACTTAA	125	8	-	Daucus carota	light responsive
PH02Gene10845.t1	chs-CMA	TTACTTAA	142	8	+	Daucus carota	light responsive
PH02Gene10845.t1	GATA-motif	AAGGATAAGG	1336	9	+	Solanum tuberosum	light responsive
PH02Gene10845.t1	G-box	CACGAC	516	6	+	Zea mays	light responsive
PH02Gene10845.t1	G-box	GCCACGTGGA	1742	9	-	Arabidopsis thaliana	light responsive
PH02Gene10845.t1	G-box	CACGTG	1744	6	-	Arabidopsis thaliana	light responsive
PH02Gene10845.t1	G-Box	CACGTT	1375	6	+	Pisum sativum	light responsive
PH02Gene10845.t1	G-Box	CACGTG	1744	6	-	Pisum sativum	light responsive
PH02Gene10845.t1	I-box	AGATAAGG	327	8	+	Triticum aestivum	light responsive
PH02Gene10845.t1	MRE	AACCTAA	1602	7	-	Petroselinum crispum	light responsive
PH02Gene10845.t1	Sp1	GGGCGG	1779	6	-	Oryza sativa	light responsive
PH02Gene10845.t1	TCCC-motif	TCTCCCT	1716	7	-	Spinacia oleracea	light responsive
PH02Gene10845.t1	TCT-motif	TCTTAC	892	6	-	Arabidopsis thaliana	light responsive
PH02Gene10845.t1	TCT-motif	TCTTAC	1331	6	-	Arabidopsis thaliana	light responsive
PH02Gene10845.t1	CCAAT-box	CAACGG	1773	6	-	Hordeum vulgare	MYBHv1 binding site
PH02Gene10845.t1	A-box	CCGTCC	1842	6	+	Petroselinum crispum	plant growth and development
PH02Gene10845.t1	RY-element	CATGCATG	704	8	+	Helianthus annuus	plant growth and development
PH02Gene10845.t1	GCN4_motif	TGAGTCA	1576	7	+	Oryza sativa	plant growth and development
PH02Gene10845.t1	WUN-motif	AAATTTCCT	775	9	-	Brassica oleracea	stess responsive
PH02Gene10845.t1	LTR	CCGAAA	1783	6	+	Hordeum vulgare	stress responsive
PH02Gene10845.t1	GC-motif	CCCCCG	1969	6	-	Zea mays	stress responsive
PH02Gene10845.t1	ARE	AAACCA	260	6	+	Zea mays	stress responsive
PH02Gene10845.t1	ARE	AAACCA	361	6	-	Zea mays	stress responsive
PH02Gene10845.t1	ARE	AAACCA	1181	6	+	Zea mays	stress responsive
PH02Gene10845.t1	ARE	AAACCA	1723	6	+	Zea mays	stress responsive
PH02Gene10845.t1	ARE	AAACCA	1787	6	+	Zea mays	stress responsive
PH02Gene10845.t1	ARE	AAACCA	1944	6	+	Zea mays	stress responsive
PH02Gene11349.t1	TGA-element	AACGAC	1336	6	+	Brassica oleracea	hormone responsive
PH02Gene11349.t1	ABRE	GCCGCGTGGC	133	9	-	Oryza sativa	hormone responsive
PH02Gene11349.t1	ABRE	ACGTG	155	5	-	Arabidopsis thaliana	hormone responsive
PH02Gene11349.t1	ABRE	CACGTG	1056	6	-	Arabidopsis thaliana	hormone responsive
PH02Gene11349.t1	ABRE	ACGTG	1057	5	+	Arabidopsis thaliana	hormone responsive
PH02Gene11349.t1	ABRE	GCAACGTGTC	1499	9	-	Hordeum vulgare	hormone responsive
PH02Gene11349.t1	CGTCA-motif	CGTCA	1631	5	+	Hordeum vulgare	hormone responsive
PH02Gene11349.t1	TGACG-motif	TGACG	1631	5	-	Hordeum vulgare	hormone responsive
PH02Gene11349.t1	CAAT-box	CAAAT	83	5	+	Pisum sativum	light responsive
PH02Gene11349.t1	CAAT-box	CAAAT	191	5	+	Pisum sativum	light responsive
PH02Gene11349.t1	CAAT-box	AGCTCAATTTCA	214	11	+	Daucus carota	light responsive
PH02Gene11349.t1	CAAT-box	CAAAT	230	5	-	Pisum sativum	light responsive
PH02Gene11349.t1	CAAT-box	CAAAT	274	5	-	Pisum sativum	light responsive
PH02Gene11349.t1	CAAT-box	CAAAT	428	5	-	Pisum sativum	light responsive
PH02Gene11349.t1	CAAT-box	CCAAT	509	5	-	Arabidopsis thaliana	light responsive
PH02Gene11349.t1	CAAT-box	CAAAT	560	5	-	Pisum sativum	light responsive
PH02Gene11349.t1	CAAT-box	CCAAT	572	5	-	Arabidopsis thaliana	light responsive
PH02Gene11349.t1	CAAT-box	CCAAT	1041	5	+	Arabidopsis thaliana	light responsive
PH02Gene11349.t1	CAAT-box	CCAAT	1132	5	+	Arabidopsis thaliana	light responsive
PH02Gene11349.t1	CAAT-box	CAAAT	1187	5	+	Pisum sativum	light responsive
PH02Gene11349.t1	CAAT-box	CAAAT	1327	5	+	Pisum sativum	light responsive
PH02Gene11349.t1	CAAT-box	CAAAT	1349	5	+	Pisum sativum	light responsive
PH02Gene11349.t1	CAAT-box	CAAAT	1358	5	-	Pisum sativum	light responsive
PH02Gene11349.t1	CAAT-box	CCAAT	1852	5	-	Arabidopsis thaliana	light responsive
PH02Gene11349.t1	ACE	GACACGTATG	99	9	+	Petroselinum crispum	light responsive
PH02Gene11349.t1	ATCT-motif	AATCTAATCC	44	9	+	Pisum sativum	light responsive
PH02Gene11349.t1	GA-motif	ATAGATAA	411	8	-	Arabidopsis thaliana	light responsive
PH02Gene11349.t1	GATA-motif	GATAGGG	344	7	+	Pisum sativum	light responsive
PH02Gene11349.t1	GATA-motif	GATAGGG	1067	7	+	Pisum sativum	light responsive
PH02Gene11349.t1	G-box	TACGTG	155	6	-	Arabidopsis thaliana	light responsive
PH02Gene11349.t1	G-box	CACGAC	760	6	-	Zea mays	light responsive
PH02Gene11349.t1	G-box	CACGAC	856	6	-	Zea mays	light responsive
PH02Gene11349.t1	G-box	CACGTG	1056	6	-	Arabidopsis thaliana	light responsive
PH02Gene11349.t1	G-Box	CACGTG	1056	6	-	Pisum sativum	light responsive
PH02Gene11349.t1	GT1-motif	GGTTAA	1139	6	+	Arabidopsis thaliana	light responsive
PH02Gene11349.t1	MRE	AACCTAA	1136	7	-	Petroselinum crispum	light responsive
PH02Gene11349.t1	Sp1	GGGCGG	168	6	+	Oryza sativa	light responsive
PH02Gene11349.t1	Sp1	GGGCGG	306	6	-	Oryza sativa	light responsive
PH02Gene11349.t1	Sp1	GGGCGG	1888	6	-	Oryza sativa	light responsive
PH02Gene11349.t1	TCCC-motif	TCTCCCT	1947	7	-	Spinacia oleracea	light responsive
PH02Gene11349.t1	CCAAT-box	CAACGG	1378	6	-	Hordeum vulgare	MYBHv1 binding site
PH02Gene11349.t1	A-box	CCGTCC	1818	6	+	Petroselinum crispum	plant growth and development
PH02Gene11349.t1	circadian	CAAAGATATC	26	9	+	Lycopersicon esculentum	plant growth and development
PH02Gene11349.t1	CAT-box	GCCACT	788	6	-	Arabidopsis thaliana	plant growth and development
PH02Gene11349.t1	CAT-box	GCCACT	1865	6	-	Arabidopsis thaliana	plant growth and development
PH02Gene11349.t1	GC-motif	CCCCCG	871	6	+	Zea mays	stress responsive
PH02Gene11349.t1	ARE	AAACCA	1403	6	+	Zea mays	stress responsive
PH02Gene11349.t1	TC-rich repeats	GTTTTCTTAC	1383	9	-	Nicotiana tabacum	stress responsive
PH02Gene11795.t1	ABRE	ACGTG	958	5	+	Arabidopsis thaliana	hormone responsive
PH02Gene11795.t1	ABRE	ACGTG	1337	5	-	Arabidopsis thaliana	hormone responsive
PH02Gene11795.t1	AuxRR-core	GGTCCAT	636	7	+	Nicotiana tabacum	hormone responsive
PH02Gene11795.t1	CGTCA-motif	CGTCA	956	5	-	Hordeum vulgare	hormone responsive
PH02Gene11795.t1	CGTCA-motif	CGTCA	1281	5	-	Hordeum vulgare	hormone responsive
PH02Gene11795.t1	CGTCA-motif	CGTCA	1311	5	-	Hordeum vulgare	hormone responsive
PH02Gene11795.t1	CGTCA-motif	CGTCA	1314	5	+	Hordeum vulgare	hormone responsive
PH02Gene11795.t1	CGTCA-motif	CGTCA	1856	5	-	Hordeum vulgare	hormone responsive
PH02Gene11795.t1	TGACG-motif	TGACG	956	5	+	Hordeum vulgare	hormone responsive
PH02Gene11795.t1	TGACG-motif	TGACG	1281	5	+	Hordeum vulgare	hormone responsive
PH02Gene11795.t1	TGACG-motif	TGACG	1311	5	+	Hordeum vulgare	hormone responsive
PH02Gene11795.t1	TGACG-motif	TGACG	1314	5	-	Hordeum vulgare	hormone responsive
PH02Gene11795.t1	TGACG-motif	TGACG	1856	5	+	Hordeum vulgare	hormone responsive
PH02Gene11795.t1	GARE-motif	TCTGTTG	655	7	+	Brassica oleracea	hormone responsive
PH02Gene11795.t1	GARE-motif	TCTGTTG	907	7	-	Brassica oleracea	hormone responsive
PH02Gene11795.t1	TGA-box	TGACGTAA	1856	8	+	Glycine max	hormone responsive
PH02Gene11795.t1	ERE	ATTTTAAA	238	8	-	Nicotiana glutinos	hormone responsive
PH02Gene11795.t1	CAAT-box	CCAAT	35	5	-	Arabidopsis thaliana	light responsive
PH02Gene11795.t1	CAAT-box	CAAAT	332	5	+	Pisum sativum	light responsive
PH02Gene11795.t1	CAAT-box	CAAAT	405	5	-	Pisum sativum	light responsive
PH02Gene11795.t1	CAAT-box	CAAAT	723	5	-	Pisum sativum	light responsive
PH02Gene11795.t1	CAAT-box	CAAAT	740	5	-	Pisum sativum	light responsive
PH02Gene11795.t1	CAAT-box	CAAAT	814	5	-	Pisum sativum	light responsive
PH02Gene11795.t1	CAAT-box	CCAAT	849	5	+	Arabidopsis thaliana	light responsive
PH02Gene11795.t1	CAAT-box	CAAAT	953	5	-	Pisum sativum	light responsive
PH02Gene11795.t1	CAAT-box	CAAAT	972	5	-	Pisum sativum	light responsive
PH02Gene11795.t1	CAAT-box	CAAAT	1077	5	+	Pisum sativum	light responsive
PH02Gene11795.t1	CAAT-box	CAAAT	1198	5	-	Pisum sativum	light responsive
PH02Gene11795.t1	CAAT-box	CAAAT	1231	5	-	Pisum sativum	light responsive
PH02Gene11795.t1	CAAT-box	CCAAT	1237	5	-	Arabidopsis thaliana	light responsive
PH02Gene11795.t1	CAAT-box	CAAAT	1787	5	+	Pisum sativum	light responsive
PH02Gene11795.t1	CAAT-box	CCAAT	1884	5	+	Arabidopsis thaliana	light responsive
PH02Gene11795.t1	GA-motif	ATAGATAA	1540	8	-	Arabidopsis thaliana	light responsive
PH02Gene11795.t1	GATA-motif	GATAGGA	571	7	-	Arabidopsis thaliana	light responsive
PH02Gene11795.t1	G-box	CACGTC	957	6	-	Zea mays	light responsive
PH02Gene11795.t1	G-box	TACGTG	1337	6	-	Arabidopsis thaliana	light responsive
PH02Gene11795.t1	G-box	CACGAC	1727	6	+	Zea mays	light responsive
PH02Gene11795.t1	GT1-motif	GGTTAAT	98	7	+	Avena sativa	light responsive
PH02Gene11795.t1	I-box	gGATAAGGTG	1350	9	+	Zea mays	light responsive
PH02Gene11795.t1	TCT-motif	TCTTAC	1096	6	+	Arabidopsis thaliana	light responsive
PH02Gene11795.t1	AE-box	AGAAACAA	759	8	+	Arabidopsis thaliana	light responsive
PH02Gene11795.t1	A-box	CCGTCC	1036	6	+	Petroselinum crispum	plant growth and development
PH02Gene11795.t1	CAT-box	GCCACT	516	6	+	Arabidopsis thaliana	plant growth and development
PH02Gene11795.t1	CAT-box	GCCACT	692	6	+	Arabidopsis thaliana	plant growth and development
PH02Gene11795.t1	CAT-box	GCCACT	1932	6	+	Arabidopsis thaliana	plant growth and development
PH02Gene11795.t1	O2-site	GATGATGTGG	1351	9	+	Zea mays	plant growth and development
PH02Gene11795.t1	O2-site	GATGACATGG	1510	9	+	Zea mays	plant growth and development
PH02Gene11795.t1	MBS	CAACTG	221	6	-	Arabidopsis thaliana	stess responsive
PH02Gene11795.t1	MBS	CAACTG	646	6	-	Arabidopsis thaliana	stess responsive
PH02Gene11795.t1	GC-motif	CCCCCG	1577	6	+	Zea mays	stress responsive
PH02Gene11795.t1	GC-motif	CCCCCG	1982	6	+	Zea mays	stress responsive
PH02Gene11795.t1	ARE	AAACCA	1676	6	+	Zea mays	stress responsive
PH02Gene11795.t1	TC-rich repeats	GTTTTCTTAC	1092	9	+	Nicotiana tabacum	stress responsive
PH02Gene11795.t1	TC-rich repeats	ATTCTCTAAC	1290	9	-	Nicotiana tabacum	stress responsive
PH02Gene12681.t1	AT-rich sequence	TAAAATACT	568	9	-	Pisum sativum	element for maximal elicitor-mediated activation (2copies)
PH02Gene12681.t1	TGA-element	AACGAC	1657	6	-	Brassica oleracea	hormone responsive
PH02Gene12681.t1	TATC-box	TATCCCA	355	7	-	Oryza sativa	hormone responsive
PH02Gene12681.t1	ABRE	ACGTG	46	5	+	Arabidopsis thaliana	hormone responsive
PH02Gene12681.t1	ABRE	ACGTG	475	5	+	Arabidopsis thaliana	hormone responsive
PH02Gene12681.t1	ABRE	ACGTG	755	5	-	Arabidopsis thaliana	hormone responsive
PH02Gene12681.t1	ABRE	GACACGTGGC	1650	9	-	Triticum aestivum	hormone responsive
PH02Gene12681.t1	AuxRR-core	GGTCCAT	1229	7	+	Nicotiana tabacum	hormone responsive
PH02Gene12681.t1	CGTCA-motif	CGTCA	95	5	+	Hordeum vulgare	hormone responsive
PH02Gene12681.t1	CGTCA-motif	CGTCA	404	5	+	Hordeum vulgare	hormone responsive
PH02Gene12681.t1	CGTCA-motif	CGTCA	1451	5	-	Hordeum vulgare	hormone responsive
PH02Gene12681.t1	TGACG-motif	TGACG	95	5	-	Hordeum vulgare	hormone responsive
PH02Gene12681.t1	TGACG-motif	TGACG	404	5	-	Hordeum vulgare	hormone responsive
PH02Gene12681.t1	TGACG-motif	TGACG	1451	5	+	Hordeum vulgare	hormone responsive
PH02Gene12681.t1	CAAT-box	CCAAT	5	5	+	Arabidopsis thaliana	light responsive
PH02Gene12681.t1	CAAT-box	CAAAT	148	5	-	Pisum sativum	light responsive
PH02Gene12681.t1	CAAT-box	CCAAT	302	5	+	Arabidopsis thaliana	light responsive
PH02Gene12681.t1	CAAT-box	CAAAT	309	5	+	Pisum sativum	light responsive
PH02Gene12681.t1	CAAT-box	CCAAT	422	5	-	Arabidopsis thaliana	light responsive
PH02Gene12681.t1	CAAT-box	CAAAT	520	5	+	Pisum sativum	light responsive
PH02Gene12681.t1	CAAT-box	CAAAT	660	5	-	Pisum sativum	light responsive
PH02Gene12681.t1	CAAT-box	CCAAT	688	5	+	Arabidopsis thaliana	light responsive
PH02Gene12681.t1	CAAT-box	CAAAT	1014	5	-	Pisum sativum	light responsive
PH02Gene12681.t1	CAAT-box	CAAAT	1277	5	-	Pisum sativum	light responsive
PH02Gene12681.t1	CAAT-box	CAAAT	1334	5	+	Pisum sativum	light responsive
PH02Gene12681.t1	CAAT-box	CAAAT	1948	5	-	Pisum sativum	light responsive
PH02Gene12681.t1	Box 4	ATTAAT	1850	6	-	Petroselinum crispum	light responsive
PH02Gene12681.t1	Box II	TGGTAATAA	703	9	-	Solanum tuberosum	light responsive
PH02Gene12681.t1	GATT-motif	CTCCTGATTGGA	416	11	+	Oryza sativa	light responsive
PH02Gene12681.t1	G-box	TACGTG	474	6	+	Arabidopsis thaliana	light responsive
PH02Gene12681.t1	G-Box	CACGTT	45	6	-	Pisum sativum	light responsive
PH02Gene12681.t1	G-Box	CACGTT	755	6	+	Pisum sativum	light responsive
PH02Gene12681.t1	G-Box	TCCACATGGCA	825	10	+	Triticum aestivum	light responsive
PH02Gene12681.t1	Sp1	GGGCGG	887	6	+	Oryza sativa	light responsive
PH02Gene12681.t1	Sp1	GGGCGG	1973	6	-	Oryza sativa	light responsive
PH02Gene12681.t1	TCT-motif	TCTTAC	279	6	+	Arabidopsis thaliana	light responsive
PH02Gene12681.t1	CCAAT-box	CAACGG	920	6	-	Hordeum vulgare	MYBHv1 binding site
PH02Gene12681.t1	CAT-box	GCCACT	1085	6	+	Arabidopsis thaliana	plant growth and development
PH02Gene12681.t1	CAT-box	GCCACT	1841	6	-	Arabidopsis thaliana	plant growth and development
PH02Gene12681.t1	O2-site	GATGATGTGG	731	9	-	Zea mays	plant growth and development
PH02Gene12681.t1	O2-site	GTTGACGTGA	754	9	-	Zea mays	plant growth and development
PH02Gene12681.t1	O2-site	GATGACATGG	1025	9	+	Zea mays	plant growth and development
PH02Gene12681.t1	MBS	CAACTG	1717	6	+	Arabidopsis thaliana	stess responsive
PH02Gene12681.t1	MBS	CAACTG	1737	6	+	Arabidopsis thaliana	stess responsive
PH02Gene12681.t1	LTR	CCGAAA	73	6	+	Hordeum vulgare	stress responsive
PH02Gene12681.t1	LTR	CCGAAA	293	6	+	Hordeum vulgare	stress responsive
PH02Gene12681.t1	ARE	AAACCA	262	6	+	Zea mays	stress responsive
PH02Gene12681.t1	ARE	AAACCA	647	6	+	Zea mays	stress responsive
PH02Gene12983.t1	AT-rich sequence	TAAAATACT	1308	9	-	Pisum sativum	element for maximal elicitor-mediated activation (2copies)
PH02Gene12983.t1	TATC-box	TATCCCA	352	7	+	Oryza sativa	hormone responsive
PH02Gene12983.t1	TCA-element	TCAGAAGAGG	946	9	+	Brassica oleracea	hormone responsive
PH02Gene12983.t1	ABRE	GACACGTGGC	89	9	-	Triticum aestivum	hormone responsive
PH02Gene12983.t1	ABRE	CACGTG	91	6	+	Arabidopsis thaliana	hormone responsive
PH02Gene12983.t1	ABRE	ACGTG	92	5	+	Arabidopsis thaliana	hormone responsive
PH02Gene12983.t1	ABRE	CGCACGTGTC	141	9	+	Hordeum vulgare	hormone responsive
PH02Gene12983.t1	ABRE	CACGTG	143	6	+	Arabidopsis thaliana	hormone responsive
PH02Gene12983.t1	ABRE	ACGTG	144	5	+	Arabidopsis thaliana	hormone responsive
PH02Gene12983.t1	AuxRR-core	GGTCCAT	171	7	+	Nicotiana tabacum	hormone responsive
PH02Gene12983.t1	AuxRR-core	GGTCCAT	187	7	+	Nicotiana tabacum	hormone responsive
PH02Gene12983.t1	CGTCA-motif	CGTCA	329	5	+	Hordeum vulgare	hormone responsive
PH02Gene12983.t1	CGTCA-motif	CGTCA	1612	5	+	Hordeum vulgare	hormone responsive
PH02Gene12983.t1	TGACG-motif	TGACG	329	5	-	Hordeum vulgare	hormone responsive
PH02Gene12983.t1	TGACG-motif	TGACG	1612	5	-	Hordeum vulgare	hormone responsive
PH02Gene12983.t1	P-box	CCTTTTG	1394	7	+	Oryza sativa	hormone responsive
PH02Gene12983.t1	ERE	ATTTTAAA	751	8	-	Nicotiana glutinos	hormone responsive
PH02Gene12983.t1	ERE	ATTTTAAA	807	8	-	Nicotiana glutinos	hormone responsive
PH02Gene12983.t1	CAAT-box	CAAAT	286	5	-	Pisum sativum	light responsive
PH02Gene12983.t1	CAAT-box	CAAAT	317	5	+	Pisum sativum	light responsive
PH02Gene12983.t1	CAAT-box	CAAAT	648	5	+	Pisum sativum	light responsive
PH02Gene12983.t1	CAAT-box	CAAAT	672	5	-	Pisum sativum	light responsive
PH02Gene12983.t1	CAAT-box	CAAAT	834	5	+	Pisum sativum	light responsive
PH02Gene12983.t1	CAAT-box	CAAAT	881	5	-	Pisum sativum	light responsive
PH02Gene12983.t1	CAAT-box	CCAAT	888	5	-	Arabidopsis thaliana	light responsive
PH02Gene12983.t1	CAAT-box	CAAAT	1021	5	-	Pisum sativum	light responsive
PH02Gene12983.t1	CAAT-box	CAAAT	1147	5	-	Pisum sativum	light responsive
PH02Gene12983.t1	CAAT-box	CAAAT	1327	5	+	Pisum sativum	light responsive
PH02Gene12983.t1	CAAT-box	CCAAT	1418	5	-	Arabidopsis thaliana	light responsive
PH02Gene12983.t1	Box 4	ATTAAT	282	6	+	Petroselinum crispum	light responsive
PH02Gene12983.t1	Box 4	ATTAAT	1112	6	-	Petroselinum crispum	light responsive
PH02Gene12983.t1	Box 4	ATTAAT	1643	6	-	Petroselinum crispum	light responsive
PH02Gene12983.t1	Box 4	ATTAAT	1968	6	-	Petroselinum crispum	light responsive
PH02Gene12983.t1	G-box	ACACGTGGC	89	9	-	Brassica napus	light responsive
PH02Gene12983.t1	G-box	CACGTG	91	6	+	Arabidopsis thaliana	light responsive
PH02Gene12983.t1	G-box	CACGTG	143	6	+	Arabidopsis thaliana	light responsive
PH02Gene12983.t1	G-box	CACGAC	1056	6	-	Zea mays	light responsive
PH02Gene12983.t1	G-box	CACGAC	1400	6	-	Zea mays	light responsive
PH02Gene12983.t1	G-Box	CACGTG	91	6	+	Pisum sativum	light responsive
PH02Gene12983.t1	G-Box	CACGTG	143	6	+	Pisum sativum	light responsive
PH02Gene12983.t1	GT1-motif	GTGTGTGAA	487	9	+	Solanum tuberosum	light responsive
PH02Gene12983.t1	GT1-motif	GGTTAAT	708	7	+	Avena sativa	light responsive
PH02Gene12983.t1	GT1-motif	GTGTGTGAA	1430	9	+	Solanum tuberosum	light responsive
PH02Gene12983.t1	CAT-box	GCCACT	77	6	+	Arabidopsis thaliana	plant growth and development
PH02Gene12983.t1	Box III	atCATTTTCACt	1296	11	+	Pisum sativum	protein binding site
PH02Gene12983.t1	LTR	CCGAAA	1680	6	+	Hordeum vulgare	stress responsive
PH02Gene12983.t1	ARE	AAACCA	622	6	-	Zea mays	stress responsive
PH02Gene12983.t1	ARE	AAACCA	698	6	-	Zea mays	stress responsive
PH02Gene13751.t2	TGA-element	AACGAC	762	6	+	Brassica oleracea	hormone responsive
PH02Gene13751.t2	TGA-element	AACGAC	1133	6	+	Brassica oleracea	hormone responsive
PH02Gene13751.t2	ABRE	ACGTG	90	5	-	Arabidopsis thaliana	hormone responsive
PH02Gene13751.t2	ABRE	GCCGCGTGGC	1208	9	-	Oryza sativa	hormone responsive
PH02Gene13751.t2	ABRE	ACGTG	1224	5	-	Arabidopsis thaliana	hormone responsive
PH02Gene13751.t2	CGTCA-motif	CGTCA	213	5	-	Hordeum vulgare	hormone responsive
PH02Gene13751.t2	CGTCA-motif	CGTCA	413	5	-	Hordeum vulgare	hormone responsive
PH02Gene13751.t2	CGTCA-motif	CGTCA	896	5	-	Hordeum vulgare	hormone responsive
PH02Gene13751.t2	CGTCA-motif	CGTCA	1389	5	-	Hordeum vulgare	hormone responsive
PH02Gene13751.t2	TGACG-motif	TGACG	213	5	+	Hordeum vulgare	hormone responsive
PH02Gene13751.t2	TGACG-motif	TGACG	413	5	+	Hordeum vulgare	hormone responsive
PH02Gene13751.t2	TGACG-motif	TGACG	896	5	+	Hordeum vulgare	hormone responsive
PH02Gene13751.t2	TGACG-motif	TGACG	1389	5	+	Hordeum vulgare	hormone responsive
PH02Gene13751.t2	CAAT-box	CCAAT	3	5	+	Arabidopsis thaliana	light responsive
PH02Gene13751.t2	CAAT-box	CCAAT	205	5	-	Arabidopsis thaliana	light responsive
PH02Gene13751.t2	CAAT-box	CAAAT	260	5	+	Pisum sativum	light responsive
PH02Gene13751.t2	CAAT-box	CAAAT	289	5	+	Pisum sativum	light responsive
PH02Gene13751.t2	CAAT-box	CAAAT	361	5	+	Pisum sativum	light responsive
PH02Gene13751.t2	CAAT-box	CAAAT	738	5	+	Pisum sativum	light responsive
PH02Gene13751.t2	CAAT-box	CAAAT	755	5	-	Pisum sativum	light responsive
PH02Gene13751.t2	CAAT-box	CAAAT	1164	5	-	Pisum sativum	light responsive
PH02Gene13751.t2	CAAT-box	CAAAT	1349	5	-	Pisum sativum	light responsive
PH02Gene13751.t2	CAAT-box	CAAAT	1354	5	+	Pisum sativum	light responsive
PH02Gene13751.t2	CAAT-box	CCAAT	1424	5	+	Arabidopsis thaliana	light responsive
PH02Gene13751.t2	CAAT-box	CAAAT	1791	5	+	Pisum sativum	light responsive
PH02Gene13751.t2	CAAT-box	CCAAT	1796	5	+	Arabidopsis thaliana	light responsive
PH02Gene13751.t2	CAAT-box	CCAAT	1869	5	+	Arabidopsis thaliana	light responsive
PH02Gene13751.t2	Box 4	ATTAAT	263	6	+	Petroselinum crispum	light responsive
PH02Gene13751.t2	Box 4	ATTAAT	292	6	+	Petroselinum crispum	light responsive
PH02Gene13751.t2	Box 4	ATTAAT	336	6	+	Petroselinum crispum	light responsive
PH02Gene13751.t2	Box 4	ATTAAT	350	6	+	Petroselinum crispum	light responsive
PH02Gene13751.t2	Box 4	ATTAAT	379	6	+	Petroselinum crispum	light responsive
PH02Gene13751.t2	Box 4	ATTAAT	436	6	+	Petroselinum crispum	light responsive
PH02Gene13751.t2	Box 4	ATTAAT	477	6	+	Petroselinum crispum	light responsive
PH02Gene13751.t2	Box 4	ATTAAT	491	6	+	Petroselinum crispum	light responsive
PH02Gene13751.t2	Box 4	ATTAAT	505	6	+	Petroselinum crispum	light responsive
PH02Gene13751.t2	Box 4	ATTAAT	548	6	+	Petroselinum crispum	light responsive
PH02Gene13751.t2	Box 4	ATTAAT	562	6	+	Petroselinum crispum	light responsive
PH02Gene13751.t2	Box 4	ATTAAT	591	6	+	Petroselinum crispum	light responsive
PH02Gene13751.t2	Box 4	ATTAAT	619	6	+	Petroselinum crispum	light responsive
PH02Gene13751.t2	Box 4	ATTAAT	651	6	+	Petroselinum crispum	light responsive
PH02Gene13751.t2	Box 4	ATTAAT	694	6	+	Petroselinum crispum	light responsive
PH02Gene13751.t2	Box 4	ATTAAT	708	6	+	Petroselinum crispum	light responsive
PH02Gene13751.t2	Box II	TGGTAATAA	424	9	-	Solanum tuberosum	light responsive
PH02Gene13751.t2	C-box	ACGAGCACCGCC	1262	11	-	Hordeum vulgare	light responsive
PH02Gene13751.t2	chs-CMA	TTACTTAA	624	8	-	Daucus carota	light responsive
PH02Gene13751.t2	GATA-motif	GATAGGA	1990	7	+	Arabidopsis thaliana	light responsive
PH02Gene13751.t2	G-box	CACGTC	90	6	+	Zea mays	light responsive
PH02Gene13751.t2	G-box	GCCACGTGGA	1208	9	+	Arabidopsis thaliana	light responsive
PH02Gene13751.t2	G-box	CACGTC	1224	6	+	Zea mays	light responsive
PH02Gene13751.t2	G-box	CACGAC	1252	6	-	Zea mays	light responsive
PH02Gene13751.t2	I-box	cCATATCCAAT	1790	10	+	Flaveria trinervia	light responsive
PH02Gene13751.t2	TCCC-motif	TCTCCCT	1631	7	-	Spinacia oleracea	light responsive
PH02Gene13751.t2	TCT-motif	TCTTAC	703	6	-	Arabidopsis thaliana	light responsive
PH02Gene13751.t2	MSA-like	(T/C)C(T/C)AACGG(T/C)(T/C)A	1176	8.5	-	Catharanthus roseus	plant growth and development
PH02Gene13751.t2	RY-element	CATGCATG	1070	8	-	Helianthus annuus	plant growth and development
PH02Gene13751.t2	RY-element	CATGCATG	1074	8	-	Helianthus annuus	plant growth and development
PH02Gene13751.t2	CAT-box	GCCACT	1320	6	-	Arabidopsis thaliana	plant growth and development
PH02Gene13751.t2	NON-box	AGATCGACG	1433	9	-	Arabidopsis thaliana	plant growth and development
PH02Gene13751.t2	WUN-motif	AAATTACTA	220	9	+	Nicotiana glutinosa	stess responsive
PH02Gene13751.t2	ARE	AAACCA	1580	6	-	Zea mays	stress responsive
PH02Gene14324.t1	TGA-element	AACGAC	482	6	+	Brassica oleracea	hormone responsive
PH02Gene14324.t1	CGTCA-motif	CGTCA	222	5	-	Hordeum vulgare	hormone responsive
PH02Gene14324.t1	TGACG-motif	TGACG	222	5	+	Hordeum vulgare	hormone responsive
PH02Gene14324.t1	CAAT-box	TGCCAAC	156	7	-	Petunia hybrida	light responsive
PH02Gene14324.t1	CAAT-box	CAAAT	241	5	+	Pisum sativum	light responsive
PH02Gene14324.t1	CAAT-box	TGCCAAC	352	7	-	Petunia hybrida	light responsive
PH02Gene14324.t1	CAAT-box	CAAAT	818	5	+	Pisum sativum	light responsive
PH02Gene14324.t1	CAAT-box	TGCCAAC	867	7	+	Petunia hybrida	light responsive
PH02Gene14324.t1	CAAT-box	CCAAT	955	5	+	Arabidopsis thaliana	light responsive
PH02Gene14324.t1	CAAT-box	CAAAT	1410	5	+	Pisum sativum	light responsive
PH02Gene14324.t1	CAAT-box	CAAAT	1614	5	+	Pisum sativum	light responsive
PH02Gene14324.t1	CAAT-box	CAACCAACTCC	1847	10	+	Arabidopsis thaliana	light responsive
PH02Gene14324.t1	CAAT-box	CCAAT	1921	5	+	Arabidopsis thaliana	light responsive
PH02Gene14324.t1	GATA-motif	GATAGGA	287	7	+	Arabidopsis thaliana	light responsive
PH02Gene14324.t1	G-box	CACGAC	97	6	-	Zea mays	light responsive
PH02Gene14324.t1	G-box	CACGAC	937	6	+	Zea mays	light responsive
PH02Gene14324.t1	I-box	gGATAAGGTG	1203	9	+	Zea mays	light responsive
PH02Gene14324.t1	Sp1	GGGCGG	1155	6	+	Oryza sativa	light responsive
PH02Gene14324.t1	Sp1	GGGCGG	1231	6	+	Oryza sativa	light responsive
PH02Gene14324.t1	TCCC-motif	TCTCCCT	1936	7	+	Spinacia oleracea	light responsive
PH02Gene14324.t1	TCCC-motif	TCTCCCT	1942	7	+	Spinacia oleracea	light responsive
PH02Gene14324.t1	TCT-motif	TCTTAC	416	6	-	Arabidopsis thaliana	light responsive
PH02Gene14324.t1	CAT-box	GCCACT	897	6	-	Arabidopsis thaliana	plant growth and development
PH02Gene14324.t1	O2-site	GATGATGTGG	10	9	-	Zea mays	plant growth and development
PH02Gene14324.t1	MBS	CAACTG	58	6	+	Arabidopsis thaliana	stess responsive
PH02Gene14324.t1	MBS	CAACTG	81	6	+	Arabidopsis thaliana	stess responsive
PH02Gene14324.t1	MBS	CAACTG	1315	6	-	Arabidopsis thaliana	stess responsive
PH02Gene14324.t1	MBS	CAACTG	1654	6	+	Arabidopsis thaliana	stess responsive
PH02Gene14324.t1	GC-motif	AGCGCGCCG	752	9	+	Oryza sativa	stress responsive
PH02Gene14324.t1	LTR	CCGAAA	610	6	+	Hordeum vulgare	stress responsive
PH02Gene14324.t1	LTR	CCGAAA	1337	6	-	Hordeum vulgare	stress responsive
PH02Gene14324.t1	LTR	CCGAAA	1861	6	+	Hordeum vulgare	stress responsive
PH02Gene14324.t1	ARE	AAACCA	393	6	-	Zea mays	stress responsive
PH02Gene15462.t1	ABRE	CGTACGTGCA	1103	9	-	Hordeum vulgare	hormone responsive
PH02Gene15462.t1	ABRE	ACGTG	1105	5	-	Arabidopsis thaliana	hormone responsive
PH02Gene15462.t1	ABRE	CGTACGTGCA	1982	9	-	Hordeum vulgare	hormone responsive
PH02Gene15462.t1	ABRE	ACGTG	1984	5	-	Arabidopsis thaliana	hormone responsive
PH02Gene15462.t1	CGTCA-motif	CGTCA	1948	5	+	Hordeum vulgare	hormone responsive
PH02Gene15462.t1	TGACG-motif	TGACG	1948	5	-	Hordeum vulgare	hormone responsive
PH02Gene15462.t1	GARE-motif	TCTGTTG	379	7	-	Brassica oleracea	hormone responsive
PH02Gene15462.t1	P-box	CCTTTTG	975	7	+	Oryza sativa	hormone responsive
PH02Gene15462.t1	CAAT-box	CAAAT	250	5	-	Pisum sativum	light responsive
PH02Gene15462.t1	CAAT-box	CCAAT	401	5	-	Arabidopsis thaliana	light responsive
PH02Gene15462.t1	CAAT-box	CCAAT	872	5	+	Arabidopsis thaliana	light responsive
PH02Gene15462.t1	CAAT-box	TGCCAAC	909	7	+	Petunia hybrida	light responsive
PH02Gene15462.t1	CAAT-box	CCAAT	1042	5	-	Arabidopsis thaliana	light responsive
PH02Gene15462.t1	CAAT-box	CCAAT	1064	5	-	Arabidopsis thaliana	light responsive
PH02Gene15462.t1	CAAT-box	CAAAT	1155	5	-	Pisum sativum	light responsive
PH02Gene15462.t1	CAAT-box	CAAAT	1165	5	-	Pisum sativum	light responsive
PH02Gene15462.t1	CAAT-box	CAAAT	1184	5	-	Pisum sativum	light responsive
PH02Gene15462.t1	CAAT-box	CAAAT	1223	5	+	Pisum sativum	light responsive
PH02Gene15462.t1	CAAT-box	CAAAT	1351	5	+	Pisum sativum	light responsive
PH02Gene15462.t1	CAAT-box	CCAAT	1606	5	+	Arabidopsis thaliana	light responsive
PH02Gene15462.t1	CAAT-box	CAAAT	1634	5	+	Pisum sativum	light responsive
PH02Gene15462.t1	3-AF1 binding site	TAAGAGAGGAA	1840	10	-	Solanum tuberosum	light responsive
PH02Gene15462.t1	Box 4	ATTAAT	139	6	+	Petroselinum crispum	light responsive
PH02Gene15462.t1	Box 4	ATTAAT	289	6	+	Petroselinum crispum	light responsive
PH02Gene15462.t1	Box 4	ATTAAT	394	6	+	Petroselinum crispum	light responsive
PH02Gene15462.t1	GATA-motif	GATAGGA	695	7	+	Arabidopsis thaliana	light responsive
PH02Gene15462.t1	G-box	TACGTG	1105	6	-	Arabidopsis thaliana	light responsive
PH02Gene15462.t1	G-box	TACGTG	1984	6	-	Arabidopsis thaliana	light responsive
PH02Gene15462.t1	GT1-motif	GGTTAA	850	6	+	Arabidopsis thaliana	light responsive
PH02Gene15462.t1	Sp1	GGGCGG	1812	6	-	Oryza sativa	light responsive
PH02Gene15462.t1	TCT-motif	TCTTAC	1522	6	+	Arabidopsis thaliana	light responsive
PH02Gene15462.t1	AE-box	AGAAACTT	1384	8	+	Arabidopsis thaliana	light responsive
PH02Gene15462.t1	CCAAT-box	CAACGG	844	6	+	Hordeum vulgare	MYBHv1 binding site
PH02Gene15462.t1	RY-element	CATGCATG	368	8	+	Helianthus annuus	plant growth and development
PH02Gene15462.t1	CAT-box	GCCACT	943	6	+	Arabidopsis thaliana	plant growth and development
PH02Gene15462.t1	CAT-box	GCCACT	1744	6	+	Arabidopsis thaliana	plant growth and development
PH02Gene15462.t1	MBS	CAACTG	1147	6	+	Arabidopsis thaliana	stess responsive
PH02Gene15462.t1	GC-motif	CGCCGCGCA	1957	9	+	Oryza sativa	stress responsive
PH02Gene15462.t1	GC-motif	CCCCCG	1021	6	+	Zea mays	stress responsive
PH02Gene15462.t1	GC-motif	CCCCCG	1809	6	+	Zea mays	stress responsive
PH02Gene15462.t1	ARE	AAACCA	1596	6	+	Zea mays	stress responsive
PH02Gene15746.t1	TGA-element	AACGAC	1153	6	-	Brassica oleracea	hormone responsive
PH02Gene15746.t1	ATCT-motif	AATCTAATCC	1685	9	-	Pisum sativum	light responsive
PH02Gene15746.t1	DRE	TACCGACAT	663	9	+	Arabidopsis thaliana	light responsive
PH02Gene15746.t1	MRE	AACCTAA	1270	7	+	Petroselinum crispum	light responsive
PH02Gene15746.t1	AE-box	AGAAACAA	1656	8	+	Arabidopsis thaliana	light responsive
PH02Gene15746.t1	CCAAT-box	CAACGG	1331	6	-	Hordeum vulgare	MYBHv1 binding site
PH02Gene15746.t1	CAT-box	GCCACT	1109	6	-	Arabidopsis thaliana	plant growth and development
PH02Gene15746.t1	CAT-box	GCCACT	1711	6	+	Arabidopsis thaliana	plant growth and development
PH02Gene15746.t1	MBS	CAACTG	316	6	-	Arabidopsis thaliana	stess responsive
PH02Gene15746.t1	MBS	CAACTG	787	6	+	Arabidopsis thaliana	stess responsive
PH02Gene15746.t1	ARE	AAACCA	907	6	-	Zea mays	stress responsive
PH02Gene15746.t1	ARE	AAACCA	1485	6	+	Zea mays	stress responsive
PH02Gene16560.t1	TATC-box	TATCCCA	1245	7	-	Oryza sativa	hormone responsive
PH02Gene16560.t1	ABRE	ACGTG	358	5	+	Arabidopsis thaliana	hormone responsive
PH02Gene16560.t1	ABRE	ACGTG	944	5	-	Arabidopsis thaliana	hormone responsive
PH02Gene16560.t1	ABRE	ACGTG	1301	5	+	Arabidopsis thaliana	hormone responsive
PH02Gene16560.t1	CGTCA-motif	CGTCA	1592	5	-	Hordeum vulgare	hormone responsive
PH02Gene16560.t1	CGTCA-motif	CGTCA	1816	5	-	Hordeum vulgare	hormone responsive
PH02Gene16560.t1	TGACG-motif	TGACG	1592	5	+	Hordeum vulgare	hormone responsive
PH02Gene16560.t1	TGACG-motif	TGACG	1816	5	+	Hordeum vulgare	hormone responsive
PH02Gene16560.t1	GARE-motif	TCTGTTG	905	7	-	Brassica oleracea	hormone responsive
PH02Gene16560.t1	CAAT-box	CAAAT	914	5	-	Pisum sativum	light responsive
PH02Gene16560.t1	CAAT-box	CAAAT	958	5	+	Pisum sativum	light responsive
PH02Gene16560.t1	CAAT-box	CAAAT	967	5	+	Pisum sativum	light responsive
PH02Gene16560.t1	CAAT-box	CAAAT	1071	5	-	Pisum sativum	light responsive
PH02Gene16560.t1	CAAT-box	CAAAT	1345	5	+	Pisum sativum	light responsive
PH02Gene16560.t1	G-box	TACGTG	357	6	+	Arabidopsis thaliana	light responsive
PH02Gene16560.t1	G-box	TACGTG	944	6	-	Arabidopsis thaliana	light responsive
PH02Gene16560.t1	G-box	TACGTG	1300	6	+	Arabidopsis thaliana	light responsive
PH02Gene16560.t1	I-box	GTATAAGGCC	1425	9	-	Larix laricina	light responsive
PH02Gene16560.t1	CCAAT-box	CAACGG	94	6	-	Hordeum vulgare	MYBHv1 binding site
PH02Gene16560.t1	CCAAT-box	CAACGG	453	6	-	Hordeum vulgare	MYBHv1 binding site
PH02Gene16560.t1	CCAAT-box	CAACGG	1488	6	-	Hordeum vulgare	MYBHv1 binding site
PH02Gene16560.t1	CAT-box	GCCACT	375	6	-	Arabidopsis thaliana	plant growth and development
PH02Gene16560.t1	CAT-box	GCCACT	1422	6	-	Arabidopsis thaliana	plant growth and development
PH02Gene16560.t1	MBS	CAACTG	744	6	-	Arabidopsis thaliana	stess responsive
PH02Gene16560.t1	WUN-motif	AAATTACTA	1280	9	-	Nicotiana glutinosa	stess responsive
PH02Gene16560.t1	WUN-motif	AAATTACT	1281	8	-	Nicotiana glutinosa	stess responsive
PH02Gene16560.t1	GC-motif	CCCCCG	1640	6	+	Zea mays	stress responsive
PH02Gene16560.t1	GC-motif	CCCCCG	1931	6	-	Zea mays	stress responsive
PH02Gene18855.t1	TCA-element	CCATCTTTTT	1838	9	-	Nicotiana tabacum	hormone responsive
PH02Gene18855.t1	ABRE	CACGTG	370	6	+	Arabidopsis thaliana	hormone responsive
PH02Gene18855.t1	ABRE	ACGTG	371	5	+	Arabidopsis thaliana	hormone responsive
PH02Gene18855.t1	ABRE	ACGTG	1131	5	-	Arabidopsis thaliana	hormone responsive
PH02Gene18855.t1	ABRE	ACGTG	1267	5	+	Arabidopsis thaliana	hormone responsive
PH02Gene18855.t1	CGTCA-motif	CGTCA	280	5	+	Hordeum vulgare	hormone responsive
PH02Gene18855.t1	CGTCA-motif	CGTCA	1047	5	-	Hordeum vulgare	hormone responsive
PH02Gene18855.t1	CGTCA-motif	CGTCA	1244	5	-	Hordeum vulgare	hormone responsive
PH02Gene18855.t1	TGACG-motif	TGACG	280	5	-	Hordeum vulgare	hormone responsive
PH02Gene18855.t1	TGACG-motif	TGACG	1047	5	+	Hordeum vulgare	hormone responsive
PH02Gene18855.t1	TGACG-motif	TGACG	1244	5	+	Hordeum vulgare	hormone responsive
PH02Gene18855.t1	P-box	CCTTTTG	340	7	+	Oryza sativa	hormone responsive
PH02Gene18855.t1	P-box	CCTTTTG	1753	7	+	Oryza sativa	hormone responsive
PH02Gene18855.t1	CAAT-box	CAAAT	2	5	-	Pisum sativum	light responsive
PH02Gene18855.t1	CAAT-box	CCAAT	55	5	+	Arabidopsis thaliana	light responsive
PH02Gene18855.t1	CAAT-box	CAAAT	103	5	+	Pisum sativum	light responsive
PH02Gene18855.t1	CAAT-box	CAAAT	464	5	+	Pisum sativum	light responsive
PH02Gene18855.t1	CAAT-box	CCAAT	499	5	-	Arabidopsis thaliana	light responsive
PH02Gene18855.t1	CAAT-box	CCAAT	563	5	-	Arabidopsis thaliana	light responsive
PH02Gene18855.t1	CAAT-box	CAAAT	776	5	+	Pisum sativum	light responsive
PH02Gene18855.t1	CAAT-box	CAAAT	817	5	+	Pisum sativum	light responsive
PH02Gene18855.t1	CAAT-box	CAAAT	850	5	+	Pisum sativum	light responsive
PH02Gene18855.t1	CAAT-box	CCAAT	1279	5	+	Arabidopsis thaliana	light responsive
PH02Gene18855.t1	CAAT-box	CAAAT	1378	5	+	Pisum sativum	light responsive
PH02Gene18855.t1	CAAT-box	CAAAT	1458	5	+	Pisum sativum	light responsive
PH02Gene18855.t1	CAAT-box	CCAAT	1701	5	+	Arabidopsis thaliana	light responsive
PH02Gene18855.t1	CAAT-box	CCAAT	1970	5	-	Arabidopsis thaliana	light responsive
PH02Gene18855.t1	ACE	GACACGTATG	1129	9	+	Petroselinum crispum	light responsive
PH02Gene18855.t1	GATA-motif	AAGGATAAGG	994	9	+	Solanum tuberosum	light responsive
PH02Gene18855.t1	G-box	CACGTG	370	6	+	Arabidopsis thaliana	light responsive
PH02Gene18855.t1	G-box	TACGTG	1131	6	-	Arabidopsis thaliana	light responsive
PH02Gene18855.t1	G-box	CACGTC	1266	6	-	Zea mays	light responsive
PH02Gene18855.t1	G-Box	CACGTG	370	6	+	Pisum sativum	light responsive
PH02Gene18855.t1	GTGGC-motif	CATCGTGTGGC	1008	10	+	Arabidopsis thaliana	light responsive
PH02Gene18855.t1	I-box	cGATAAGGCG	215	9	-	Zea mays	light responsive
PH02Gene18855.t1	I-box	cGATAAGGCG	1860	9	+	Zea mays	light responsive
PH02Gene18855.t1	Sp1	GGGCGG	502	6	+	Oryza sativa	light responsive
PH02Gene18855.t1	Sp1	GGGCGG	1218	6	+	Oryza sativa	light responsive
PH02Gene18855.t1	AE-box	AGAAACAA	913	8	+	Arabidopsis thaliana	light responsive
PH02Gene18855.t1	CCAAT-box	CAACGG	127	6	+	Hordeum vulgare	MYBHv1 binding site
PH02Gene18855.t1	A-box	CCGTCC	1935	6	+	Petroselinum crispum	plant growth and development
PH02Gene18855.t1	circadian	CAAAGATATC	833	9	+	Lycopersicon esculentum	plant growth and development
PH02Gene18855.t1	CAT-box	GCCACT	1013	6	-	Arabidopsis thaliana	plant growth and development
PH02Gene18855.t1	ARE	AAACCA	738	6	+	Zea mays	stress responsive
PH02Gene18855.t1	ARE	AAACCA	829	6	+	Zea mays	stress responsive
PH02Gene18855.t1	TC-rich repeats	GTTTTCTTAC	512	9	+	Nicotiana tabacum	stress responsive
PH02Gene19136.t1	ABRE	CGTACGTGCA	1825	9	+	Hordeum vulgare	hormone responsive
PH02Gene19136.t1	ABRE	ACGTG	1941	5	-	Arabidopsis thaliana	hormone responsive
PH02Gene19136.t1	CGTCA-motif	CGTCA	949	5	-	Hordeum vulgare	hormone responsive
PH02Gene19136.t1	CGTCA-motif	CGTCA	1843	5	+	Hordeum vulgare	hormone responsive
PH02Gene19136.t1	TGACG-motif	TGACG	949	5	+	Hordeum vulgare	hormone responsive
PH02Gene19136.t1	TGACG-motif	TGACG	1843	5	-	Hordeum vulgare	hormone responsive
PH02Gene19136.t1	ERE	ATTTTAAA	1419	8	+	Nicotiana glutinos	hormone responsive
PH02Gene19136.t1	ERE	ATTTTAAA	1421	8	-	Nicotiana glutinos	hormone responsive
PH02Gene19136.t1	CAAT-box	CAAAT	21	5	-	Pisum sativum	light responsive
PH02Gene19136.t1	CAAT-box	CAAAT	106	5	-	Pisum sativum	light responsive
PH02Gene19136.t1	CAAT-box	CAAAT	272	5	-	Pisum sativum	light responsive
PH02Gene19136.t1	CAAT-box	CAAAT	355	5	+	Pisum sativum	light responsive
PH02Gene19136.t1	CAAT-box	CAAAT	562	5	+	Pisum sativum	light responsive
PH02Gene19136.t1	CAAT-box	CAAAT	696	5	-	Pisum sativum	light responsive
PH02Gene19136.t1	CAAT-box	TGCCAAC	884	7	-	Petunia hybrida	light responsive
PH02Gene19136.t1	CAAT-box	CAAAT	992	5	+	Pisum sativum	light responsive
PH02Gene19136.t1	CAAT-box	CAAAT	1109	5	+	Pisum sativum	light responsive
PH02Gene19136.t1	CAAT-box	CCAAT	1221	5	+	Arabidopsis thaliana	light responsive
PH02Gene19136.t1	CAAT-box	CAAAT	1293	5	-	Pisum sativum	light responsive
PH02Gene19136.t1	CAAT-box	CAAAT	1704	5	+	Pisum sativum	light responsive
PH02Gene19136.t1	CAAT-box	CCAAT	1853	5	+	Arabidopsis thaliana	light responsive
PH02Gene19136.t1	CAAT-box	CAAAT	1876	5	-	Pisum sativum	light responsive
PH02Gene19136.t1	Box 4	ATTAAT	709	6	+	Petroselinum crispum	light responsive
PH02Gene19136.t1	G-box	TAACACGTAG	297	9	+	Brassica oleracea	light responsive
PH02Gene19136.t1	G-box	CACGAC	1095	6	+	Zea mays	light responsive
PH02Gene19136.t1	G-box	CACGTC	1941	6	+	Zea mays	light responsive
PH02Gene19136.t1	CCAAT-box	CAACGG	98	6	-	Hordeum vulgare	MYBHv1 binding site
PH02Gene19136.t1	CAT-box	GCCACT	789	6	-	Arabidopsis thaliana	plant growth and development
PH02Gene19136.t1	MBS	CAACTG	389	6	-	Arabidopsis thaliana	stess responsive
PH02Gene19136.t1	MBS	CAACTG	882	6	-	Arabidopsis thaliana	stess responsive
PH02Gene19136.t1	MBS	CAACTG	1212	6	-	Arabidopsis thaliana	stess responsive
PH02Gene19136.t1	LTR	CCGAAA	613	6	-	Hordeum vulgare	stress responsive
PH02Gene19136.t1	LTR	CCGAAA	1401	6	+	Hordeum vulgare	stress responsive
PH02Gene19136.t1	LTR	CCGAAA	1503	6	-	Hordeum vulgare	stress responsive
PH02Gene19136.t1	LTR	CCGAAA	1519	6	-	Hordeum vulgare	stress responsive
PH02Gene19136.t1	GC-motif	CCCCCG	1799	6	+	Zea mays	stress responsive
PH02Gene19136.t1	ARE	AAACCA	744	6	-	Zea mays	stress responsive
PH02Gene19136.t1	ARE	AAACCA	772	6	-	Zea mays	stress responsive
PH02Gene19136.t1	ARE	AAACCA	1317	6	+	Zea mays	stress responsive
PH02Gene19136.t1	ARE	AAACCA	1543	6	+	Zea mays	stress responsive
PH02Gene19161.t1	ABRE	ACGTG	691	5	-	Arabidopsis thaliana	hormone responsive
PH02Gene19161.t1	ABRE	ACGTG	988	5	+	Arabidopsis thaliana	hormone responsive
PH02Gene19161.t1	ABRE	ACGTG	1587	5	-	Arabidopsis thaliana	hormone responsive
PH02Gene19161.t1	P-box	CCTTTTG	1750	7	+	Oryza sativa	hormone responsive
PH02Gene19161.t1	CAAT-box	CCAAT	513	5	+	Arabidopsis thaliana	light responsive
PH02Gene19161.t1	CAAT-box	CAAAT	551	5	-	Pisum sativum	light responsive
PH02Gene19161.t1	CAAT-box	CAAAT	560	5	+	Pisum sativum	light responsive
PH02Gene19161.t1	CAAT-box	AGCTCAATTTCA	1040	11	+	Daucus carota	light responsive
PH02Gene19161.t1	CAAT-box	CCAAT	1224	5	+	Arabidopsis thaliana	light responsive
PH02Gene19161.t1	CAAT-box	CAAAT	1279	5	+	Pisum sativum	light responsive
PH02Gene19161.t1	CAAT-box	CAAAT	1382	5	+	Pisum sativum	light responsive
PH02Gene19161.t1	CAAT-box	CCAAT	1410	5	+	Arabidopsis thaliana	light responsive
PH02Gene19161.t1	CAAT-box	CAAAT	1451	5	+	Pisum sativum	light responsive
PH02Gene19161.t1	CAAT-box	CCAAT	1699	5	+	Arabidopsis thaliana	light responsive
PH02Gene19161.t1	CAAT-box	CAAAT	1780	5	+	Pisum sativum	light responsive
PH02Gene19161.t1	ACE	CTAACGTATT	319	9	+	Petroselinum crispum	light responsive
PH02Gene19161.t1	ACE	CTAACGTATT	593	9	-	Petroselinum crispum	light responsive
PH02Gene19161.t1	ACE	CTAACGTATT	1021	9	-	Petroselinum crispum	light responsive
PH02Gene19161.t1	Box 4	ATTAAT	80	6	+	Petroselinum crispum	light responsive
PH02Gene19161.t1	Box 4	ATTAAT	341	6	+	Petroselinum crispum	light responsive
PH02Gene19161.t1	G-box	TACGTG	691	6	-	Arabidopsis thaliana	light responsive
PH02Gene19161.t1	G-Box	CACGTT	987	6	-	Pisum sativum	light responsive
PH02Gene19161.t1	G-Box	CACGTT	1587	6	+	Pisum sativum	light responsive
PH02Gene19161.t1	MRE	AACCTAA	1140	7	+	Petroselinum crispum	light responsive
PH02Gene19161.t1	AE-box	AGAAACAA	745	8	+	Arabidopsis thaliana	light responsive
PH02Gene19161.t1	A-box	CCGTCC	1992	6	+	Petroselinum crispum	plant growth and development
PH02Gene19161.t1	O2-site	GATGATGTGG	186	9	+	Zea mays	plant growth and development
PH02Gene19161.t1	ARE	AAACCA	371	6	+	Zea mays	stress responsive
PH02Gene19161.t1	ARE	AAACCA	631	6	+	Zea mays	stress responsive
PH02Gene19161.t1	ARE	AAACCA	973	6	-	Zea mays	stress responsive
PH02Gene19161.t1	ARE	AAACCA	1076	6	+	Zea mays	stress responsive
PH02Gene19161.t1	TC-rich repeats	GTTTTCTTAC	1268	9	-	Nicotiana tabacum	stress responsive
PH02Gene20094.t2	ABRE	ACGTG	491	5	-	Arabidopsis thaliana	hormone responsive
PH02Gene20094.t2	ABRE	CGCACGTGTC	1005	9	+	Hordeum vulgare	hormone responsive
PH02Gene20094.t2	ABRE	CACGTG	1007	6	-	Arabidopsis thaliana	hormone responsive
PH02Gene20094.t2	ABRE	ACGTG	1008	5	+	Arabidopsis thaliana	hormone responsive
PH02Gene20094.t2	ABRE	ACGTG	1156	5	-	Arabidopsis thaliana	hormone responsive
PH02Gene20094.t2	ABRE	ACGTG	1513	5	+	Arabidopsis thaliana	hormone responsive
PH02Gene20094.t2	CGTCA-motif	CGTCA	1499	5	-	Hordeum vulgare	hormone responsive
PH02Gene20094.t2	CGTCA-motif	CGTCA	1708	5	+	Hordeum vulgare	hormone responsive
PH02Gene20094.t2	TGACG-motif	TGACG	1499	5	+	Hordeum vulgare	hormone responsive
PH02Gene20094.t2	TGACG-motif	TGACG	1708	5	-	Hordeum vulgare	hormone responsive
PH02Gene20094.t2	GARE-motif	TCTGTTG	277	7	-	Brassica oleracea	hormone responsive
PH02Gene20094.t2	P-box	CCTTTTG	144	7	-	Oryza sativa	hormone responsive
PH02Gene20094.t2	ERE	ATTTTAAA	335	8	+	Nicotiana glutinos	hormone responsive
PH02Gene20094.t2	ERE	ATTTTAAA	668	8	+	Nicotiana glutinos	hormone responsive
PH02Gene20094.t2	CAAT-box	CCAAT	71	5	-	Arabidopsis thaliana	light responsive
PH02Gene20094.t2	CAAT-box	CCAAT	158	5	+	Arabidopsis thaliana	light responsive
PH02Gene20094.t2	CAAT-box	CAAAT	267	5	+	Pisum sativum	light responsive
PH02Gene20094.t2	CAAT-box	CCAAT	442	5	+	Arabidopsis thaliana	light responsive
PH02Gene20094.t2	CAAT-box	CCAAT	785	5	-	Arabidopsis thaliana	light responsive
PH02Gene20094.t2	CAAT-box	CAAAT	1381	5	-	Pisum sativum	light responsive
PH02Gene20094.t2	CAAT-box	CCAAT	1466	5	+	Arabidopsis thaliana	light responsive
PH02Gene20094.t2	CAAT-box	CAAAT	1612	5	+	Pisum sativum	light responsive
PH02Gene20094.t2	CAAT-box	CAAAT	1682	5	+	Pisum sativum	light responsive
PH02Gene20094.t2	CAAT-box	CAAAT	1685	5	-	Pisum sativum	light responsive
PH02Gene20094.t2	Box 4	ATTAAT	1828	6	-	Petroselinum crispum	light responsive
PH02Gene20094.t2	GATA-motif	AAGATAAGATT	729	10	+	Arabidopsis thaliana	light responsive
PH02Gene20094.t2	GATA-motif	GATAGGA	1394	7	+	Arabidopsis thaliana	light responsive
PH02Gene20094.t2	G-Box	CACGTG	1007	6	-	Pisum sativum	light responsive
PH02Gene20094.t2	G-Box	CACGTT	1512	6	-	Pisum sativum	light responsive
PH02Gene20094.t2	G-box	CACGTC	491	6	+	Zea mays	light responsive
PH02Gene20094.t2	G-box	CACGTG	1007	6	-	Arabidopsis thaliana	light responsive
PH02Gene20094.t2	G-box	CACGTC	1156	6	+	Zea mays	light responsive
PH02Gene20094.t2	MRE	AACCTAA	46	7	+	Petroselinum crispum	light responsive
PH02Gene20094.t2	TCCC-motif	TCTCCCT	1319	7	-	Spinacia oleracea	light responsive
PH02Gene20094.t2	TCT-motif	TCTTAC	466	6	-	Arabidopsis thaliana	light responsive
PH02Gene20094.t2	AE-box	AGAAACTT	711	8	-	Arabidopsis thaliana	light responsive
PH02Gene20094.t2	CCAAT-box	CAACGG	618	6	+	Hordeum vulgare	MYBHv1 binding site
PH02Gene20094.t2	A-box	CCGTCC	994	6	+	Petroselinum crispum	plant growth and development
PH02Gene20094.t2	A-box	CCGTCC	1484	6	+	Petroselinum crispum	plant growth and development
PH02Gene20094.t2	CAT-box	GCCACT	510	6	+	Arabidopsis thaliana	plant growth and development
PH02Gene20094.t2	LTR	CCGAAA	1849	6	+	Hordeum vulgare	stress responsive
PH02Gene20094.t2	GC-motif	CCCCCG	1389	6	-	Zea mays	stress responsive
PH02Gene20094.t2	ARE	AAACCA	73	6	-	Zea mays	stress responsive
PH02Gene20094.t2	ARE	AAACCA	95	6	+	Zea mays	stress responsive
PH02Gene20094.t2	ARE	AAACCA	741	6	+	Zea mays	stress responsive
PH02Gene20272.t1	AT-rich sequence	TAAAATACT	1303	9	-	Pisum sativum	element for maximal elicitor-mediated activation (2copies)
PH02Gene20272.t1	TATC-box	TATCCCA	1222	7	-	Oryza sativa	hormone responsive
PH02Gene20272.t1	AuxRR-core	GGTCCAT	1786	7	-	Nicotiana tabacum	hormone responsive
PH02Gene20272.t1	CGTCA-motif	CGTCA	534	5	-	Hordeum vulgare	hormone responsive
PH02Gene20272.t1	CGTCA-motif	CGTCA	887	5	-	Hordeum vulgare	hormone responsive
PH02Gene20272.t1	CGTCA-motif	CGTCA	1635	5	+	Hordeum vulgare	hormone responsive
PH02Gene20272.t1	TGACG-motif	TGACG	534	5	+	Hordeum vulgare	hormone responsive
PH02Gene20272.t1	TGACG-motif	TGACG	887	5	+	Hordeum vulgare	hormone responsive
PH02Gene20272.t1	TGACG-motif	TGACG	1635	5	-	Hordeum vulgare	hormone responsive
PH02Gene20272.t1	CAAT-box	CCAAT	335	5	+	Arabidopsis thaliana	light responsive
PH02Gene20272.t1	CAAT-box	CAAAT	393	5	-	Pisum sativum	light responsive
PH02Gene20272.t1	CAAT-box	CAAAT	441	5	-	Pisum sativum	light responsive
PH02Gene20272.t1	CAAT-box	CAAAT	549	5	+	Pisum sativum	light responsive
PH02Gene20272.t1	CAAT-box	CCAAT	572	5	+	Arabidopsis thaliana	light responsive
PH02Gene20272.t1	CAAT-box	CAAAT	945	5	-	Pisum sativum	light responsive
PH02Gene20272.t1	CAAT-box	CCAAT	1024	5	-	Arabidopsis thaliana	light responsive
PH02Gene20272.t1	CAAT-box	CAAAT	1074	5	-	Pisum sativum	light responsive
PH02Gene20272.t1	CAAT-box	CCCAATTT	1136	8	-	Arabidopsis thaliana	light responsive
PH02Gene20272.t1	CAAT-box	CCAAT	1138	5	-	Arabidopsis thaliana	light responsive
PH02Gene20272.t1	CAAT-box	CCAAT	1452	5	-	Arabidopsis thaliana	light responsive
PH02Gene20272.t1	CAAT-box	CCAAT	1873	5	-	Arabidopsis thaliana	light responsive
PH02Gene20272.t1	Box 4	ATTAAT	1666	6	-	Petroselinum crispum	light responsive
PH02Gene20272.t1	Box 4	ATTAAT	1968	6	-	Petroselinum crispum	light responsive
PH02Gene20272.t1	chs-CMA	TTACTTAA	1084	8	-	Daucus carota	light responsive
PH02Gene20272.t1	GATA-motif	GATAGGG	1225	7	+	Pisum sativum	light responsive
PH02Gene20272.t1	GT1-motif	GGTTAA	1082	6	+	Arabidopsis thaliana	light responsive
PH02Gene20272.t1	GTGGC-motif	CATCGTGTGGC	108	10	-	Arabidopsis thaliana	light responsive
PH02Gene20272.t1	MRE	AACCTAA	1098	7	+	Petroselinum crispum	light responsive
PH02Gene20272.t1	MRE	AACCTAA	1392	7	+	Petroselinum crispum	light responsive
PH02Gene20272.t1	O2-site	GATGA(C/T)(A/G)TG(A/G)	1626	8	-	Zea mays	plant growth and development
PH02Gene20272.t1	GC-motif	CCCCCG	489	6	+	Zea mays	stress responsive
PH02Gene20682.t1	TGA-element	AACGAC	632	6	-	Brassica oleracea	hormone responsive
PH02Gene20682.t1	ABRE	ACGTG	623	5	+	Arabidopsis thaliana	hormone responsive
PH02Gene20682.t1	ABRE	ACGTG	1311	5	+	Arabidopsis thaliana	hormone responsive
PH02Gene20682.t1	CGTCA-motif	CGTCA	462	5	-	Hordeum vulgare	hormone responsive
PH02Gene20682.t1	CGTCA-motif	CGTCA	603	5	-	Hordeum vulgare	hormone responsive
PH02Gene20682.t1	CGTCA-motif	CGTCA	655	5	-	Hordeum vulgare	hormone responsive
PH02Gene20682.t1	CGTCA-motif	CGTCA	734	5	+	Hordeum vulgare	hormone responsive
PH02Gene20682.t1	CGTCA-motif	CGTCA	1309	5	-	Hordeum vulgare	hormone responsive
PH02Gene20682.t1	CGTCA-motif	CGTCA	1518	5	+	Hordeum vulgare	hormone responsive
PH02Gene20682.t1	CGTCA-motif	CGTCA	1903	5	+	Hordeum vulgare	hormone responsive
PH02Gene20682.t1	TGACG-motif	TGACG	462	5	+	Hordeum vulgare	hormone responsive
PH02Gene20682.t1	TGACG-motif	TGACG	603	5	+	Hordeum vulgare	hormone responsive
PH02Gene20682.t1	TGACG-motif	TGACG	655	5	+	Hordeum vulgare	hormone responsive
PH02Gene20682.t1	TGACG-motif	TGACG	734	5	-	Hordeum vulgare	hormone responsive
PH02Gene20682.t1	TGACG-motif	TGACG	1309	5	+	Hordeum vulgare	hormone responsive
PH02Gene20682.t1	TGACG-motif	TGACG	1518	5	-	Hordeum vulgare	hormone responsive
PH02Gene20682.t1	TGACG-motif	TGACG	1903	5	-	Hordeum vulgare	hormone responsive
PH02Gene20682.t1	P-box	CCTTTTG	11	7	-	Oryza sativa	hormone responsive
PH02Gene20682.t1	ERE	ATTTTAAA	1360	8	-	Nicotiana glutinos	hormone responsive
PH02Gene20682.t1	ERE	ATTTTAAA	1368	8	+	Nicotiana glutinos	hormone responsive
PH02Gene20682.t1	CAAT-box	CCAAT	27	5	+	Arabidopsis thaliana	light responsive
PH02Gene20682.t1	CAAT-box	CAAAT	46	5	+	Pisum sativum	light responsive
PH02Gene20682.t1	CAAT-box	CCAAT	54	5	-	Arabidopsis thaliana	light responsive
PH02Gene20682.t1	CAAT-box	CCAAT	70	5	-	Arabidopsis thaliana	light responsive
PH02Gene20682.t1	CAAT-box	CCAAT	130	5	-	Arabidopsis thaliana	light responsive
PH02Gene20682.t1	CAAT-box	CAAAT	749	5	+	Pisum sativum	light responsive
PH02Gene20682.t1	CAAT-box	CAAAT	964	5	-	Pisum sativum	light responsive
PH02Gene20682.t1	CAAT-box	CCAAT	1108	5	-	Arabidopsis thaliana	light responsive
PH02Gene20682.t1	CAAT-box	CAAAT	1288	5	-	Pisum sativum	light responsive
PH02Gene20682.t1	CAAT-box	CCAAT	1626	5	+	Arabidopsis thaliana	light responsive
PH02Gene20682.t1	CAAT-box	CAACCAACTCC	1964	10	-	Arabidopsis thaliana	light responsive
PH02Gene20682.t1	Box 4	ATTAAT	218	6	+	Petroselinum crispum	light responsive
PH02Gene20682.t1	G-box	CACGTC	622	6	-	Zea mays	light responsive
PH02Gene20682.t1	G-box	CACGTC	1310	6	-	Zea mays	light responsive
PH02Gene20682.t1	I-box	gGATAAGGTG	1889	9	-	Zea mays	light responsive
PH02Gene20682.t1	LAMP-element	CTTTATCA	94	8	-	Pisum sativum	light responsive
PH02Gene20682.t1	plant_AP-2-like	CGACCAGG	559	8	-	Oryza sativa	plant growth and development
PH02Gene20682.t1	A-box	CCGTCC	413	6	-	Petroselinum crispum	plant growth and development
PH02Gene20682.t1	CAT-box	GCCACT	352	6	-	Arabidopsis thaliana	plant growth and development
PH02Gene20682.t1	Box III	atCATTTTCACt	86	11	-	Pisum sativum	protein binding site
PH02Gene20682.t1	MBS	CAACTG	1810	6	-	Arabidopsis thaliana	stess responsive
PH02Gene20682.t1	GC-motif	CCCCCG	1244	6	-	Zea mays	stress responsive
PH02Gene20842.t1	ABRE	ACGTG	1743	5	-	Arabidopsis thaliana	hormone responsive
PH02Gene20842.t1	ABRE	GCAACGTGTC	1817	9	-	Hordeum vulgare	hormone responsive
PH02Gene20842.t1	ABRE	ACGTG	1819	5	-	Arabidopsis thaliana	hormone responsive
PH02Gene20842.t1	CAAT-box	CCAAT	929	5	+	Arabidopsis thaliana	light responsive
PH02Gene20842.t1	CAAT-box	CAAAT	937	5	+	Pisum sativum	light responsive
PH02Gene20842.t1	CAAT-box	CAAAT	1207	5	-	Pisum sativum	light responsive
PH02Gene20842.t1	CAAT-box	CAAAT	1252	5	+	Pisum sativum	light responsive
PH02Gene20842.t1	CAAT-box	CCAAT	1260	5	+	Arabidopsis thaliana	light responsive
PH02Gene20842.t1	CAAT-box	CCAAT	1263	5	-	Arabidopsis thaliana	light responsive
PH02Gene20842.t1	CAAT-box	CAAAT	1337	5	+	Pisum sativum	light responsive
PH02Gene20842.t1	CAAT-box	CCAAT	1403	5	+	Arabidopsis thaliana	light responsive
PH02Gene20842.t1	CAAT-box	CCAAT	1737	5	+	Arabidopsis thaliana	light responsive
PH02Gene20842.t1	CAAT-box	CAAAT	1905	5	+	Pisum sativum	light responsive
PH02Gene20842.t1	G-Box	CACGTT	1819	6	+	Pisum sativum	light responsive
PH02Gene20842.t1	G-box	TACGTG	1743	6	-	Arabidopsis thaliana	light responsive
PH02Gene20842.t1	Sp1	GGGCGG	1583	6	+	Oryza sativa	light responsive
PH02Gene20842.t1	CCAAT-box	CAACGG	1895	6	+	Hordeum vulgare	MYBHv1 binding site
PH02Gene20842.t1	CAT-box	GCCACT	1825	6	+	Arabidopsis thaliana	plant growth and development
PH02Gene21914.t1	TGA-element	AACGAC	119	6	-	Brassica oleracea	hormone responsive
PH02Gene21914.t1	TCA-element	TCAGAAGAGG	321	9	+	Brassica oleracea	hormone responsive
PH02Gene21914.t1	TCA-element	CCATCTTTTT	868	9	-	Nicotiana tabacum	hormone responsive
PH02Gene21914.t1	TCA-element	CCATCTTTTT	1758	9	+	Nicotiana tabacum	hormone responsive
PH02Gene21914.t1	TCA-element	TCAGAAGAGG	1953	9	+	Brassica oleracea	hormone responsive
PH02Gene21914.t1	CGTCA-motif	CGTCA	104	5	+	Hordeum vulgare	hormone responsive
PH02Gene21914.t1	CGTCA-motif	CGTCA	1110	5	-	Hordeum vulgare	hormone responsive
PH02Gene21914.t1	TGACG-motif	TGACG	104	5	-	Hordeum vulgare	hormone responsive
PH02Gene21914.t1	TGACG-motif	TGACG	1110	5	+	Hordeum vulgare	hormone responsive
PH02Gene21914.t1	P-box	CCTTTTG	953	7	+	Oryza sativa	hormone responsive
PH02Gene21914.t1	ERE	ATTTCATA	1115	8	+	Nicotiana glutinos	hormone responsive
PH02Gene21914.t1	ERE	ATTTCATA	1187	8	-	Nicotiana glutinos	hormone responsive
PH02Gene21914.t1	CAAT-box	CAAAT	74	5	+	Pisum sativum	light responsive
PH02Gene21914.t1	CAAT-box	CAAAT	644	5	+	Pisum sativum	light responsive
PH02Gene21914.t1	CAAT-box	CAAAT	854	5	+	Pisum sativum	light responsive
PH02Gene21914.t1	CAAT-box	CAAAT	1006	5	+	Pisum sativum	light responsive
PH02Gene21914.t1	CAAT-box	CCAAT	1163	5	+	Arabidopsis thaliana	light responsive
PH02Gene21914.t1	CAAT-box	CAAAT	1166	5	-	Pisum sativum	light responsive
PH02Gene21914.t1	CAAT-box	CAAAT	1244	5	+	Pisum sativum	light responsive
PH02Gene21914.t1	Box 4	ATTAAT	93	6	+	Petroselinum crispum	light responsive
PH02Gene21914.t1	G-box	TAACACGTAG	197	9	+	Brassica oleracea	light responsive
PH02Gene21914.t1	GT1-motif	GGTTAA	661	6	-	Arabidopsis thaliana	light responsive
PH02Gene21914.t1	GT1-motif	GGTTAA	1679	6	-	Arabidopsis thaliana	light responsive
PH02Gene21914.t1	GTGGC-motif	CAGCGTGTGGC	455	10	+	Hordeum vulgare	light responsive
PH02Gene21914.t1	Pc-CMA2c	GCCCACGCA	1428	9	+	Pisum sativum	light responsive
PH02Gene21914.t1	AE-box	AGAAACAA	639	8	+	Arabidopsis thaliana	light responsive
PH02Gene21914.t1	A-box	CCGTCC	533	6	-	Petroselinum crispum	plant growth and development
PH02Gene21914.t1	GC-motif	CCCCCG	1146	6	+	Zea mays	stress responsive
PH02Gene21914.t1	GC-motif	CCCCCG	1908	6	+	Zea mays	stress responsive
PH02Gene21914.t1	ARE	AAACCA	1519	6	-	Zea mays	stress responsive
PH02Gene21914.t1	TC-rich repeats	GTTTTCTTAC	1127	9	+	Nicotiana tabacum	stress responsive
PH02Gene22033.t1	AuxRR-core	GGTCCAT	1311	7	+	Nicotiana tabacum	hormone responsive
PH02Gene22033.t1	CGTCA-motif	CGTCA	425	5	-	Hordeum vulgare	hormone responsive
PH02Gene22033.t1	TGACG-motif	TGACG	425	5	+	Hordeum vulgare	hormone responsive
PH02Gene22033.t1	CAAT-box	CAAAT	589	5	-	Pisum sativum	light responsive
PH02Gene22033.t1	CAAT-box	CAAAT	759	5	+	Pisum sativum	light responsive
PH02Gene22033.t1	CAAT-box	CCAAT	907	5	-	Arabidopsis thaliana	light responsive
PH02Gene22033.t1	CAAT-box	CCAAT	958	5	-	Arabidopsis thaliana	light responsive
PH02Gene22033.t1	CAAT-box	CAAAT	1019	5	-	Pisum sativum	light responsive
PH02Gene22033.t1	CAAT-box	CCAAT	1090	5	+	Arabidopsis thaliana	light responsive
PH02Gene22033.t1	CAAT-box	CCAAT	1361	5	+	Arabidopsis thaliana	light responsive
PH02Gene22033.t1	CAAT-box	CAAAT	1526	5	-	Pisum sativum	light responsive
PH02Gene22033.t1	CAAT-box	CAAAT	1548	5	-	Pisum sativum	light responsive
PH02Gene22033.t1	CAAT-box	CAAAT	1558	5	+	Pisum sativum	light responsive
PH02Gene22033.t1	CAAT-box	CAAAT	1620	5	+	Pisum sativum	light responsive
PH02Gene22033.t1	CAAT-box	CAAAT	1876	5	-	Pisum sativum	light responsive
PH02Gene22033.t1	CAAT-box	TGCAAATCT	1978	9	-	Brassica juncea	light responsive
PH02Gene22033.t1	CAAT-box	CAAAT	1980	5	-	Pisum sativum	light responsive
PH02Gene22033.t1	3-AF1 binding site	TAAGAGAGGAA	524	10	-	Solanum tuberosum	light responsive
PH02Gene22033.t1	Box 4	ATTAAT	609	6	+	Petroselinum crispum	light responsive
PH02Gene22033.t1	Box 4	ATTAAT	1364	6	-	Petroselinum crispum	light responsive
PH02Gene22033.t1	GT1-motif	GGTTAA	1650	6	+	Arabidopsis thaliana	light responsive
PH02Gene22033.t1	TCCC-motif	TCTCCCT	399	7	-	Spinacia oleracea	light responsive
PH02Gene22033.t1	TCT-motif	TCTTAC	1512	6	-	Arabidopsis thaliana	light responsive
PH02Gene22033.t1	AE-box	AGAAACAA	664	8	-	Arabidopsis thaliana	light responsive
PH02Gene22033.t1	CAT-box	GCCACT	474	6	+	Arabidopsis thaliana	plant growth and development
PH02Gene22033.t1	CAT-box	GCCACT	754	6	-	Arabidopsis thaliana	plant growth and development
PH02Gene22033.t1	CAT-box	GCCACT	1411	6	-	Arabidopsis thaliana	plant growth and development
PH02Gene22033.t1	MBS	CAACTG	332	6	-	Arabidopsis thaliana	stess responsive
PH02Gene22033.t1	MBS	CAACTG	813	6	+	Arabidopsis thaliana	stess responsive
PH02Gene22033.t1	MBS	CAACTG	965	6	-	Arabidopsis thaliana	stess responsive
PH02Gene22033.t1	MBS	CAACTG	1224	6	-	Arabidopsis thaliana	stess responsive
PH02Gene22033.t1	MBS	CAACTG	1286	6	+	Arabidopsis thaliana	stess responsive
PH02Gene22033.t1	MBS	CAACTG	1501	6	-	Arabidopsis thaliana	stess responsive
PH02Gene22033.t1	MBS	CAACTG	1728	6	-	Arabidopsis thaliana	stess responsive
PH02Gene22033.t1	ARE	AAACCA	684	6	-	Zea mays	stress responsive
PH02Gene22033.t1	ARE	AAACCA	1243	6	-	Zea mays	stress responsive
PH02Gene22462.t1	TCA-element	TCAGAAGAGG	665	9	-	Brassica oleracea	hormone responsive
PH02Gene22462.t1	ABRE	ACGTG	3	5	-	Arabidopsis thaliana	hormone responsive
PH02Gene22462.t1	ABRE	GCAACGTGTC	360	9	+	Hordeum vulgare	hormone responsive
PH02Gene22462.t1	ABRE	CACGTG	362	6	+	Arabidopsis thaliana	hormone responsive
PH02Gene22462.t1	ABRE	ACGTG	363	5	+	Arabidopsis thaliana	hormone responsive
PH02Gene22462.t1	ABRE	CACGTG	501	6	+	Arabidopsis thaliana	hormone responsive
PH02Gene22462.t1	ABRE	ACGTG	502	5	+	Arabidopsis thaliana	hormone responsive
PH02Gene22462.t1	ABRE	CACGTG	1771	6	-	Arabidopsis thaliana	hormone responsive
PH02Gene22462.t1	ABRE	ACGTG	1772	5	+	Arabidopsis thaliana	hormone responsive
PH02Gene22462.t1	ABRE	GCAACGTGTC	1785	9	+	Hordeum vulgare	hormone responsive
PH02Gene22462.t1	ABRE	CACGTG	1787	6	-	Arabidopsis thaliana	hormone responsive
PH02Gene22462.t1	ABRE	ACGTG	1788	5	+	Arabidopsis thaliana	hormone responsive
PH02Gene22462.t1	ABRE	CACGTG	1826	6	-	Arabidopsis thaliana	hormone responsive
PH02Gene22462.t1	ABRE	ACGTG	1827	5	+	Arabidopsis thaliana	hormone responsive
PH02Gene22462.t1	CGTCA-motif	CGTCA	1363	5	-	Hordeum vulgare	hormone responsive
PH02Gene22462.t1	TGACG-motif	TGACG	1363	5	+	Hordeum vulgare	hormone responsive
PH02Gene22462.t1	ERE	ATTTCATA	1119	8	-	Nicotiana glutinos	hormone responsive
PH02Gene22462.t1	CAAT-box	CAAAT	722	5	+	Pisum sativum	light responsive
PH02Gene22462.t1	CAAT-box	CAAAT	793	5	+	Pisum sativum	light responsive
PH02Gene22462.t1	CAAT-box	CAAAT	799	5	+	Pisum sativum	light responsive
PH02Gene22462.t1	CAAT-box	CAAAT	805	5	+	Pisum sativum	light responsive
PH02Gene22462.t1	CAAT-box	CAAAT	828	5	+	Pisum sativum	light responsive
PH02Gene22462.t1	CAAT-box	CAAAT	834	5	+	Pisum sativum	light responsive
PH02Gene22462.t1	CAAT-box	CCAAT	991	5	+	Arabidopsis thaliana	light responsive
PH02Gene22462.t1	CAAT-box	CAAAT	1044	5	+	Pisum sativum	light responsive
PH02Gene22462.t1	CAAT-box	CAAAT	1160	5	-	Pisum sativum	light responsive
PH02Gene22462.t1	CAAT-box	CAAAT	1173	5	+	Pisum sativum	light responsive
PH02Gene22462.t1	CAAT-box	CAAAT	1273	5	-	Pisum sativum	light responsive
PH02Gene22462.t1	CAAT-box	CCAAT	1343	5	+	Arabidopsis thaliana	light responsive
PH02Gene22462.t1	CAAT-box	CAAAT	1403	5	+	Pisum sativum	light responsive
PH02Gene22462.t1	CAAT-box	CAAAT	1438	5	-	Pisum sativum	light responsive
PH02Gene22462.t1	CAAT-box	CAAAT	1506	5	+	Pisum sativum	light responsive
PH02Gene22462.t1	CAAT-box	CAAAT	1556	5	-	Pisum sativum	light responsive
PH02Gene22462.t1	CAAT-box	CCAAT	1883	5	+	Arabidopsis thaliana	light responsive
PH02Gene22462.t1	CAAT-box	CAAAT	1985	5	+	Pisum sativum	light responsive
PH02Gene22462.t1	ACE	GCGACGTACC	1667	9	+	Petroselinum crispum	light responsive
PH02Gene22462.t1	GA-motif	ATAGATAA	936	8	-	Arabidopsis thaliana	light responsive
PH02Gene22462.t1	G-Box	CACGTG	362	6	+	Pisum sativum	light responsive
PH02Gene22462.t1	G-Box	CACGTG	501	6	+	Pisum sativum	light responsive
PH02Gene22462.t1	G-Box	CACGTG	1771	6	-	Pisum sativum	light responsive
PH02Gene22462.t1	G-Box	CACGTG	1787	6	-	Pisum sativum	light responsive
PH02Gene22462.t1	G-Box	CACGTG	1826	6	-	Pisum sativum	light responsive
PH02Gene22462.t1	G-box	TACGTG	3	6	-	Arabidopsis thaliana	light responsive
PH02Gene22462.t1	G-box	tgACACGTGGCA	359	11	-	Lycopersicon esculentum	light responsive
PH02Gene22462.t1	G-box	ACACGTGGC	360	9	-	Brassica napus	light responsive
PH02Gene22462.t1	G-box	CACGTG	362	6	+	Arabidopsis thaliana	light responsive
PH02Gene22462.t1	G-box	CACGAC	468	6	+	Zea mays	light responsive
PH02Gene22462.t1	G-box	CACGTG	501	6	+	Arabidopsis thaliana	light responsive
PH02Gene22462.t1	G-box	CACGTG	1771	6	-	Arabidopsis thaliana	light responsive
PH02Gene22462.t1	G-box	ACACGTGGC	1785	9	-	Brassica napus	light responsive
PH02Gene22462.t1	G-box	CACGTG	1787	6	-	Arabidopsis thaliana	light responsive
PH02Gene22462.t1	G-box	CACGTG	1826	6	-	Arabidopsis thaliana	light responsive
PH02Gene22462.t1	GT1-motif	GGTTAAT	42	7	-	Avena sativa	light responsive
PH02Gene22462.t1	GT1-motif	GGTTAA	43	6	-	Arabidopsis thaliana	light responsive
PH02Gene22462.t1	Sp1	GGGCGG	289	6	+	Oryza sativa	light responsive
PH02Gene22462.t1	Sp1	GGGCGG	320	6	-	Oryza sativa	light responsive
PH02Gene22462.t1	Sp1	GGGCGG	1763	6	-	Oryza sativa	light responsive
PH02Gene22462.t1	AE-box	AGAAACTT	1280	8	-	Arabidopsis thaliana	light responsive
PH02Gene22462.t1	CCAAT-box	CAACGG	1314	6	+	Hordeum vulgare	MYBHv1 binding site
PH02Gene22462.t1	plant_AP-2-like	CGACCAGG	303	8	+	Oryza sativa	plant growth and development
PH02Gene22462.t1	plant_AP-2-like	CGACCAGG	369	8	-	Oryza sativa	plant growth and development
PH02Gene22462.t1	WUN-motif	AAATTACTA	1433	9	-	Nicotiana glutinosa	stess responsive
PH02Gene22462.t1	WUN-motif	AAATTACT	1434	8	-	Nicotiana glutinosa	stess responsive
PH02Gene22462.t1	LTR	CCGAAA	771	6	+	Hordeum vulgare	stress responsive
PH02Gene22462.t1	LTR	CCGAAA	1463	6	+	Hordeum vulgare	stress responsive
PH02Gene22462.t1	LTR	CCGAAA	1660	6	-	Hordeum vulgare	stress responsive
PH02Gene22462.t1	ARE	AAACCA	1600	6	+	Zea mays	stress responsive
PH02Gene22682.t2	TCA-element	CCATCTTTTT	358	9	+	Nicotiana tabacum	hormone responsive
PH02Gene22682.t2	TCA-element	CCATCTTTTT	1682	9	+	Nicotiana tabacum	hormone responsive
PH02Gene22682.t2	ABRE	ACGTG	293	5	+	Arabidopsis thaliana	hormone responsive
PH02Gene22682.t2	ABRE	CACGTG	630	6	+	Arabidopsis thaliana	hormone responsive
PH02Gene22682.t2	ABRE	ACGTG	631	5	+	Arabidopsis thaliana	hormone responsive
PH02Gene22682.t2	ABRE	ACGTG	649	5	+	Arabidopsis thaliana	hormone responsive
PH02Gene22682.t2	ABRE	ACGTG	1361	5	+	Arabidopsis thaliana	hormone responsive
PH02Gene22682.t2	ABRE	GCAACGTGTC	1657	9	-	Hordeum vulgare	hormone responsive
PH02Gene22682.t2	ABRE	ACGTG	1659	5	-	Arabidopsis thaliana	hormone responsive
PH02Gene22682.t2	CGTCA-motif	CGTCA	82	5	-	Hordeum vulgare	hormone responsive
PH02Gene22682.t2	CGTCA-motif	CGTCA	600	5	-	Hordeum vulgare	hormone responsive
PH02Gene22682.t2	CGTCA-motif	CGTCA	647	5	-	Hordeum vulgare	hormone responsive
PH02Gene22682.t2	TGACG-motif	TGACG	82	5	+	Hordeum vulgare	hormone responsive
PH02Gene22682.t2	TGACG-motif	TGACG	600	5	+	Hordeum vulgare	hormone responsive
PH02Gene22682.t2	TGACG-motif	TGACG	647	5	+	Hordeum vulgare	hormone responsive
PH02Gene22682.t2	ERE	ATTTCATA	1015	8	-	Nicotiana glutinos	hormone responsive
PH02Gene22682.t2	CAAT-box	CCAAT	10	5	-	Arabidopsis thaliana	light responsive
PH02Gene22682.t2	CAAT-box	CAAAT	65	5	+	Pisum sativum	light responsive
PH02Gene22682.t2	CAAT-box	CAAAT	107	5	-	Pisum sativum	light responsive
PH02Gene22682.t2	CAAT-box	CAAAT	467	5	+	Pisum sativum	light responsive
PH02Gene22682.t2	CAAT-box	CAAAT	487	5	+	Pisum sativum	light responsive
PH02Gene22682.t2	CAAT-box	CAAAT	492	5	-	Pisum sativum	light responsive
[truncated: 2,997 more rows]

## Sheet: Table S6
Table S6 Primers used in this study
Primer	Forward primer (5’-3’)	Reverse primer (5’-3’)	Strategy
TIP41	AAAATCATTGTAGGCCATTGTCG	ACTAAATTAAGCCAGCGGGAGTG	qRT-PCR analysis
PePUB01	TCGCTTTCTGGACTGCTGG	CACTGGTCTCCCTGTGCTGTTA	qRT-PCR analysis
PePUB15	GTGGACCTCCTACAGAATGGG	TTCAGCAATGCCGTCACAAT	qRT-PCR analysis
PePUB60	TGGACAAGCAGGCAGTGGA	TGGACAACACCGTTGGGAT	qRT-PCR analysis
PePUB92	TCATGGGTGATGTATGGTGGC	CCTTTGCATTTATGCGTTGC	qRT-PCR analysis
PePUB105	ATTACCCAAGACAGCAACCAAC	CCGCATCATCCTGCCATTA	qRT-PCR analysis
PePUB117	GAGTGCTTTCGCTGCTCGTA	TGGCAGACTTTGTCACCGATT	qRT-PCR analysis
PePUB118	CCATTGCCCTAGTAAGCGACAT	CACGCATTGCACAGCATACAC	qRT-PCR analysis
PePUB120	GGTGCTGGACTGGATTAGGAG	TGTATCTGTGGATAAGAGGCAAACT	qRT-PCR analysis
